# Supplementary material
Source: PubMed Central journal article supplement (PMC3112462)
Supplement: NIHMS293213-supplement-2_si_002.pdf [file NIHMS293213-supplement-2_si_002.pdf]

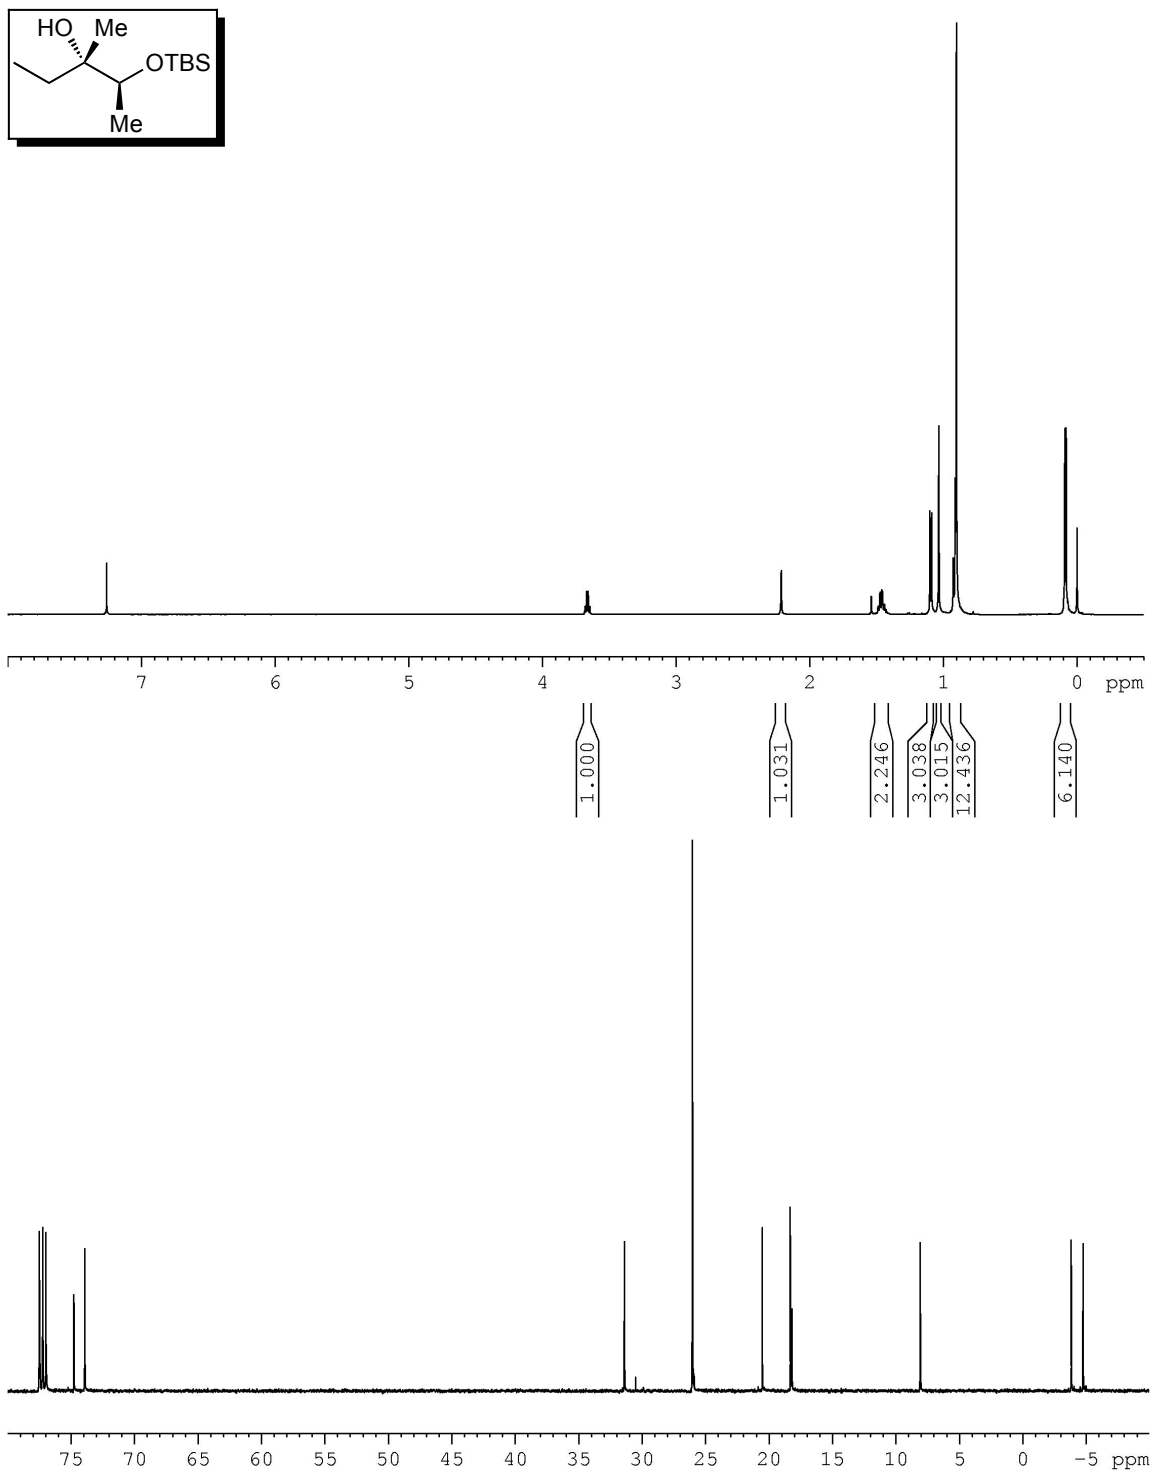

**Figure SI-1.** 500 MHz  $^1\text{H}$  and 125 MHz  $^{13}\text{C}\{^1\text{H}\}$  NMR in  $\text{CDCl}_3$ .

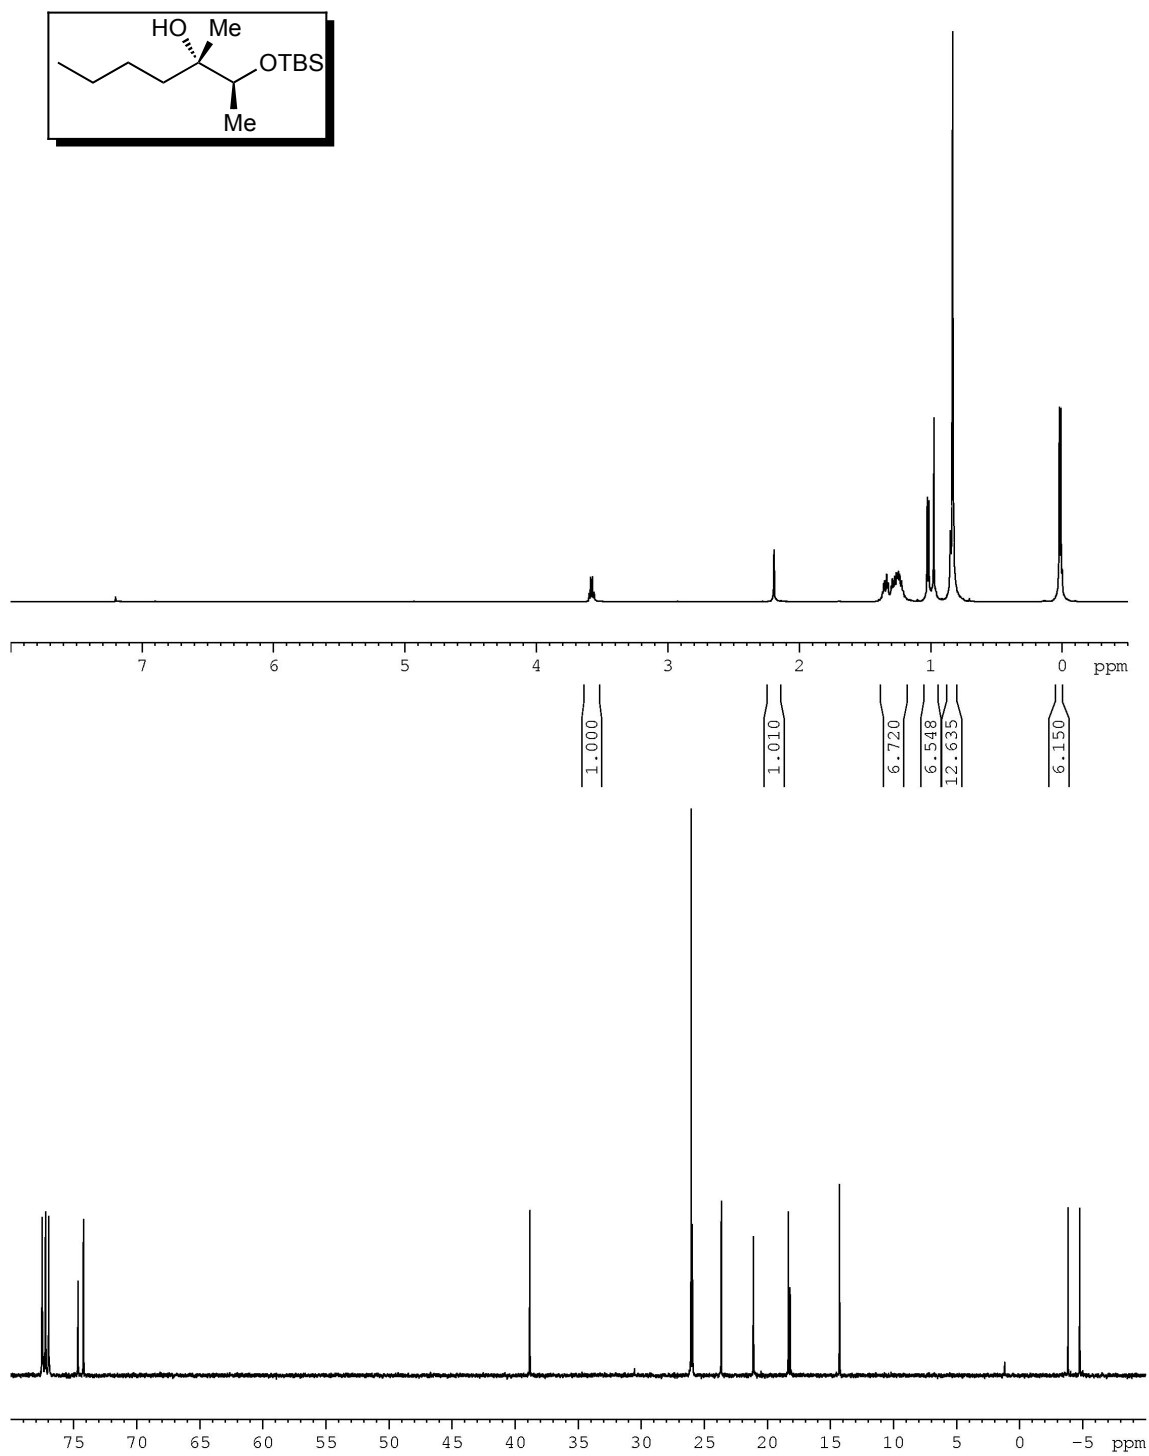

**Figure SI-2.** 500 MHz  $^1\text{H}$  and 125 MHz  $^{13}\text{C}\{^1\text{H}\}$  NMR in  $\text{CDCl}_3$ .

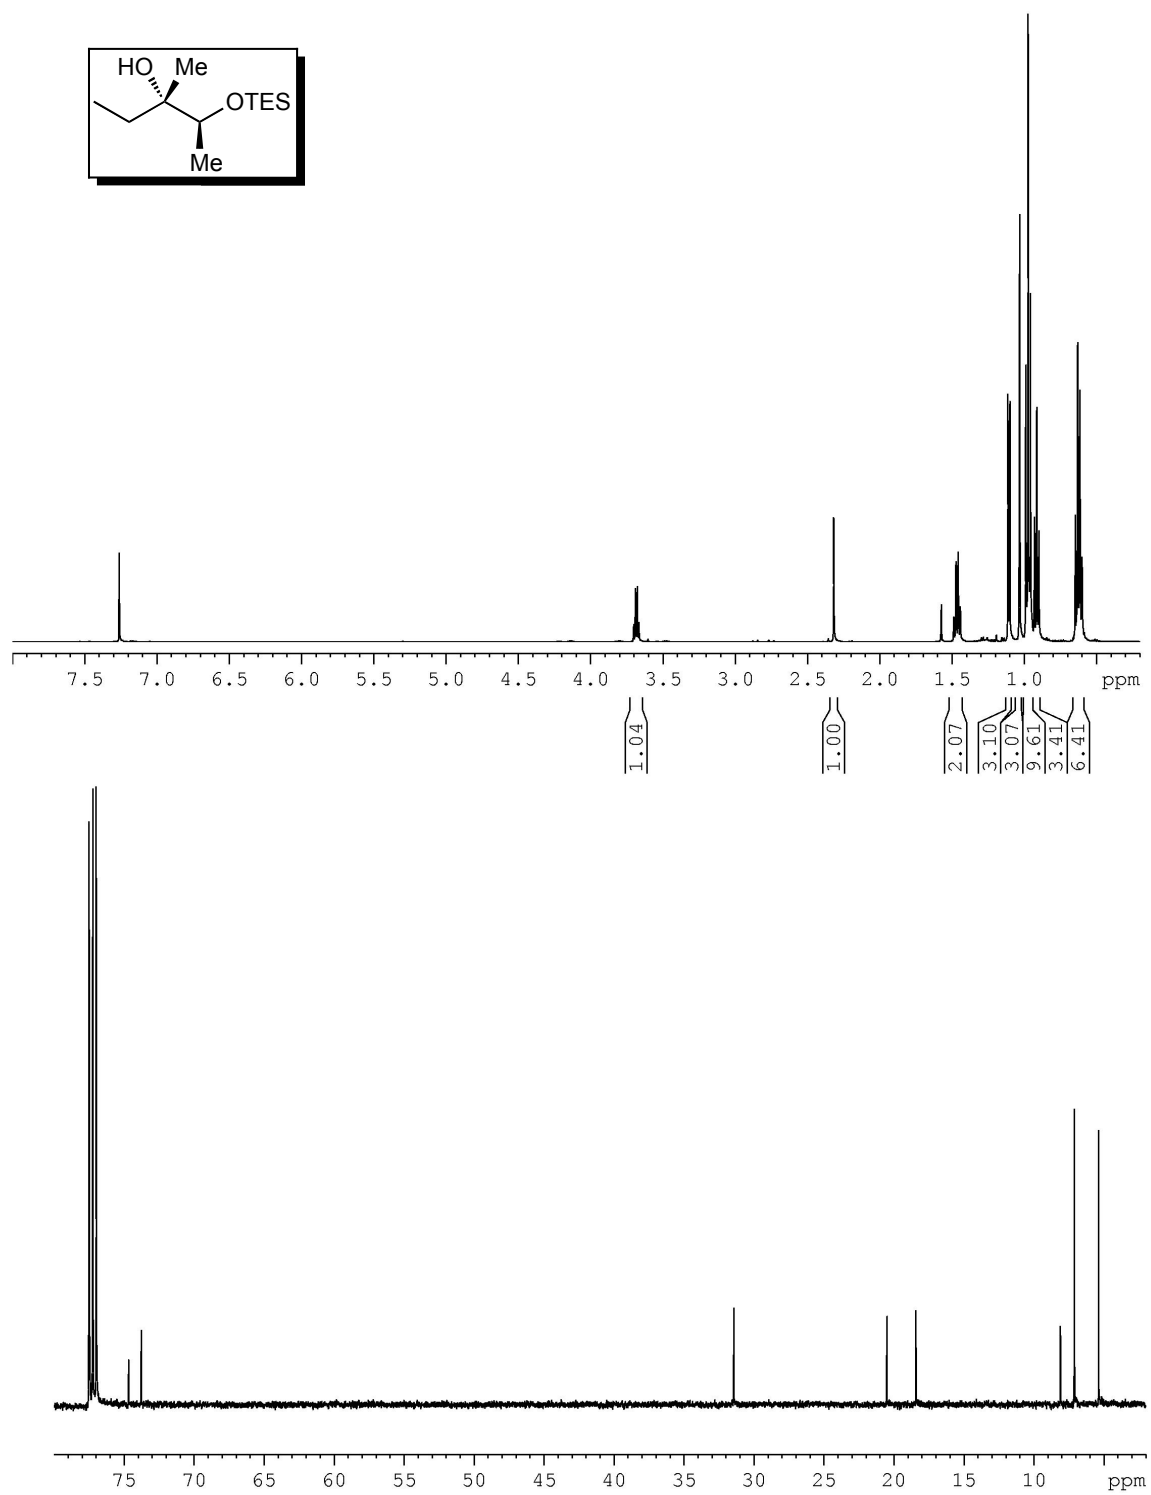

**Figure SI-3.** 300 MHz <sup>1</sup>H and 125 MHz <sup>13</sup>C{<sup>1</sup>H} NMR in CDCl<sub>3</sub>.

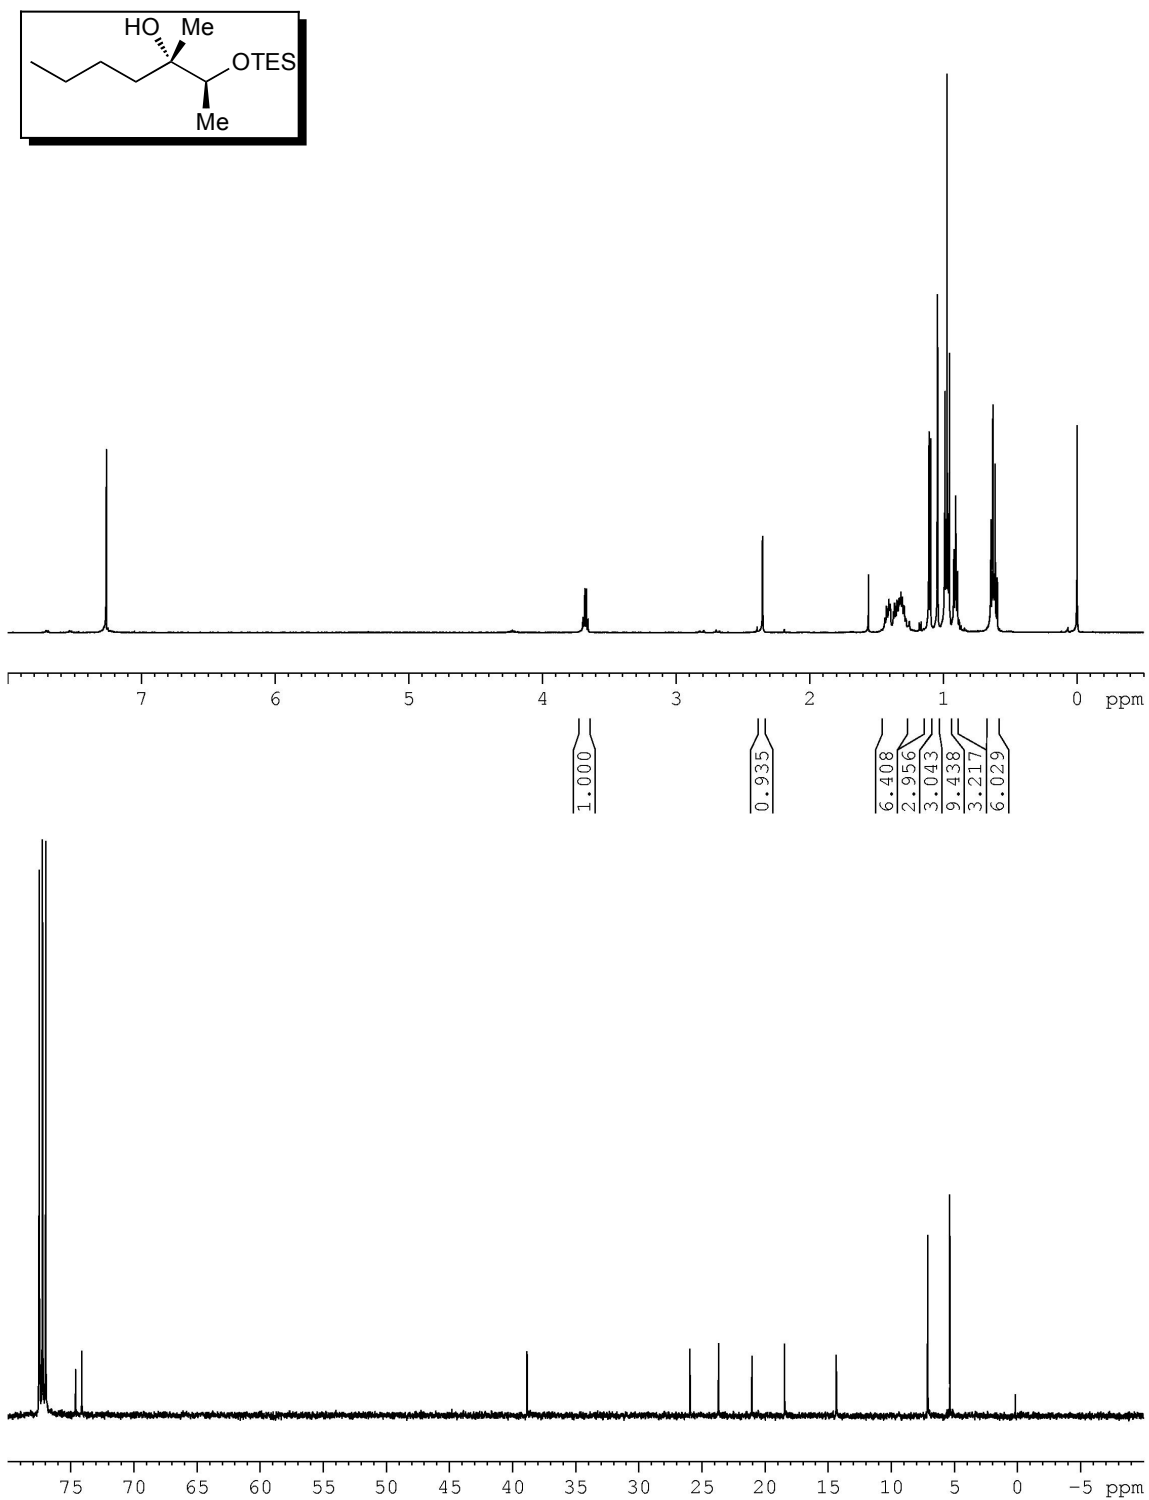

**Figure SI-4.** 500 MHz  $^1\text{H}$  and 125 MHz  $^{13}\text{C}\{^1\text{H}\}$  NMR in  $\text{CDCl}_3$ .



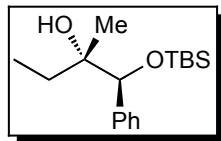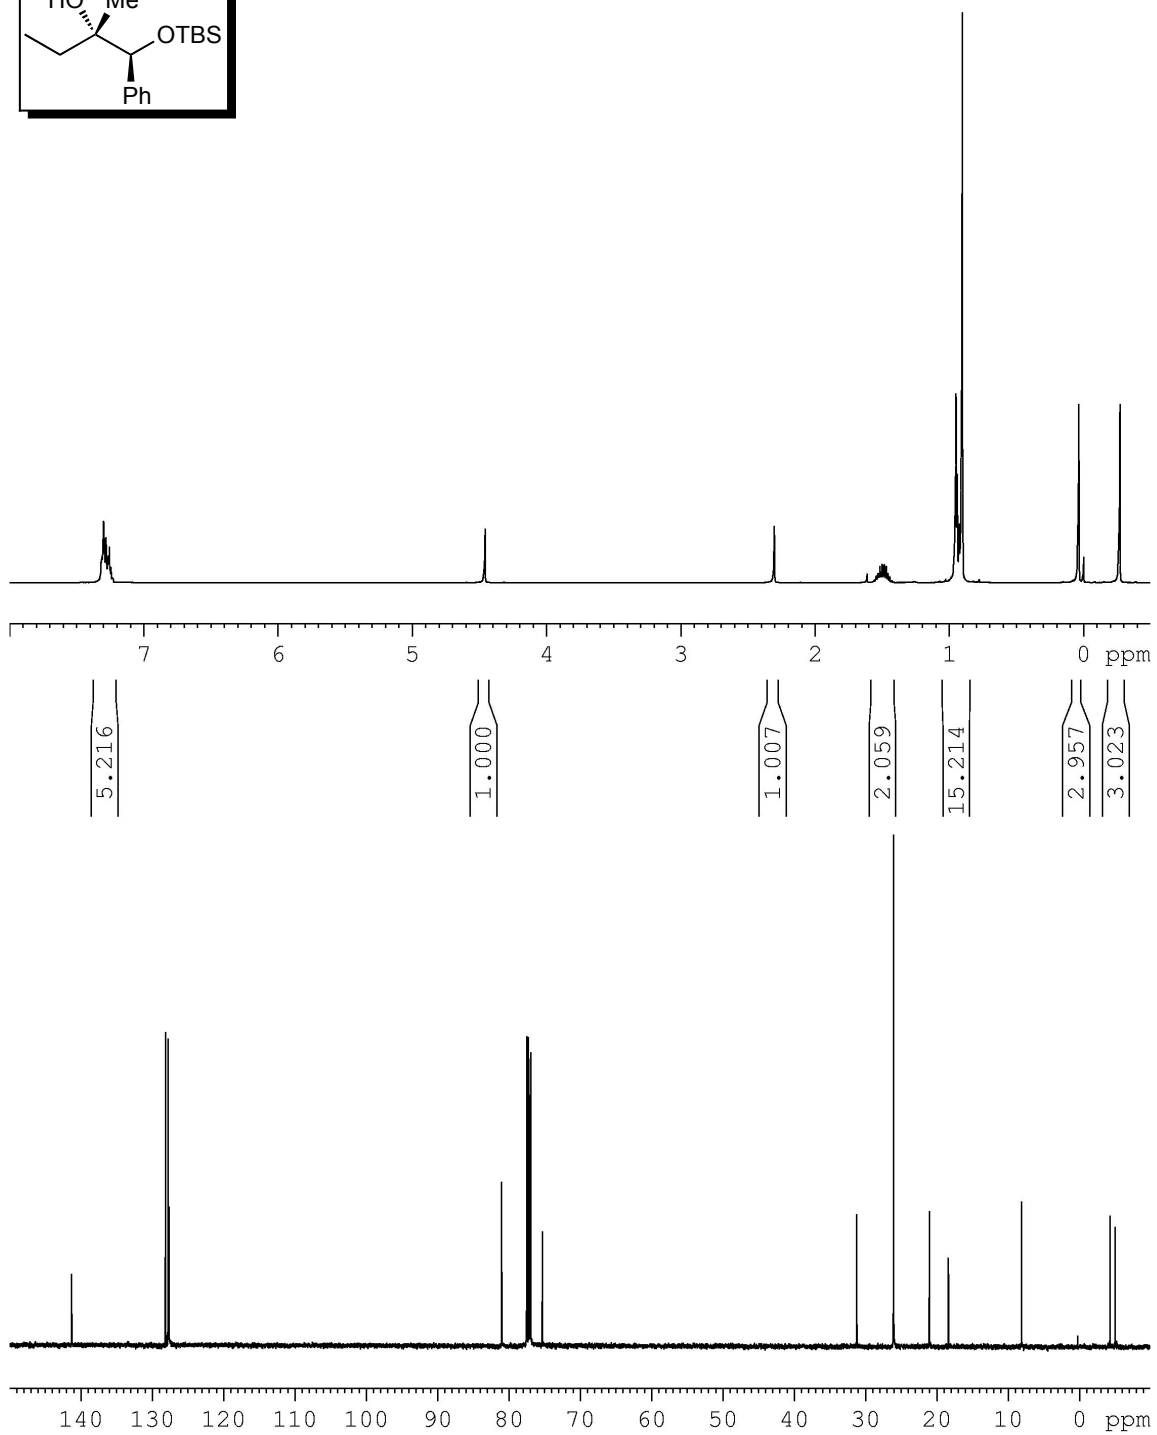

**Figure SI-5.** 500 MHz  $^1\text{H}$  and 125 MHz  $^{13}\text{C}\{^1\text{H}\}$  NMR in  $\text{CDCl}_3$ .

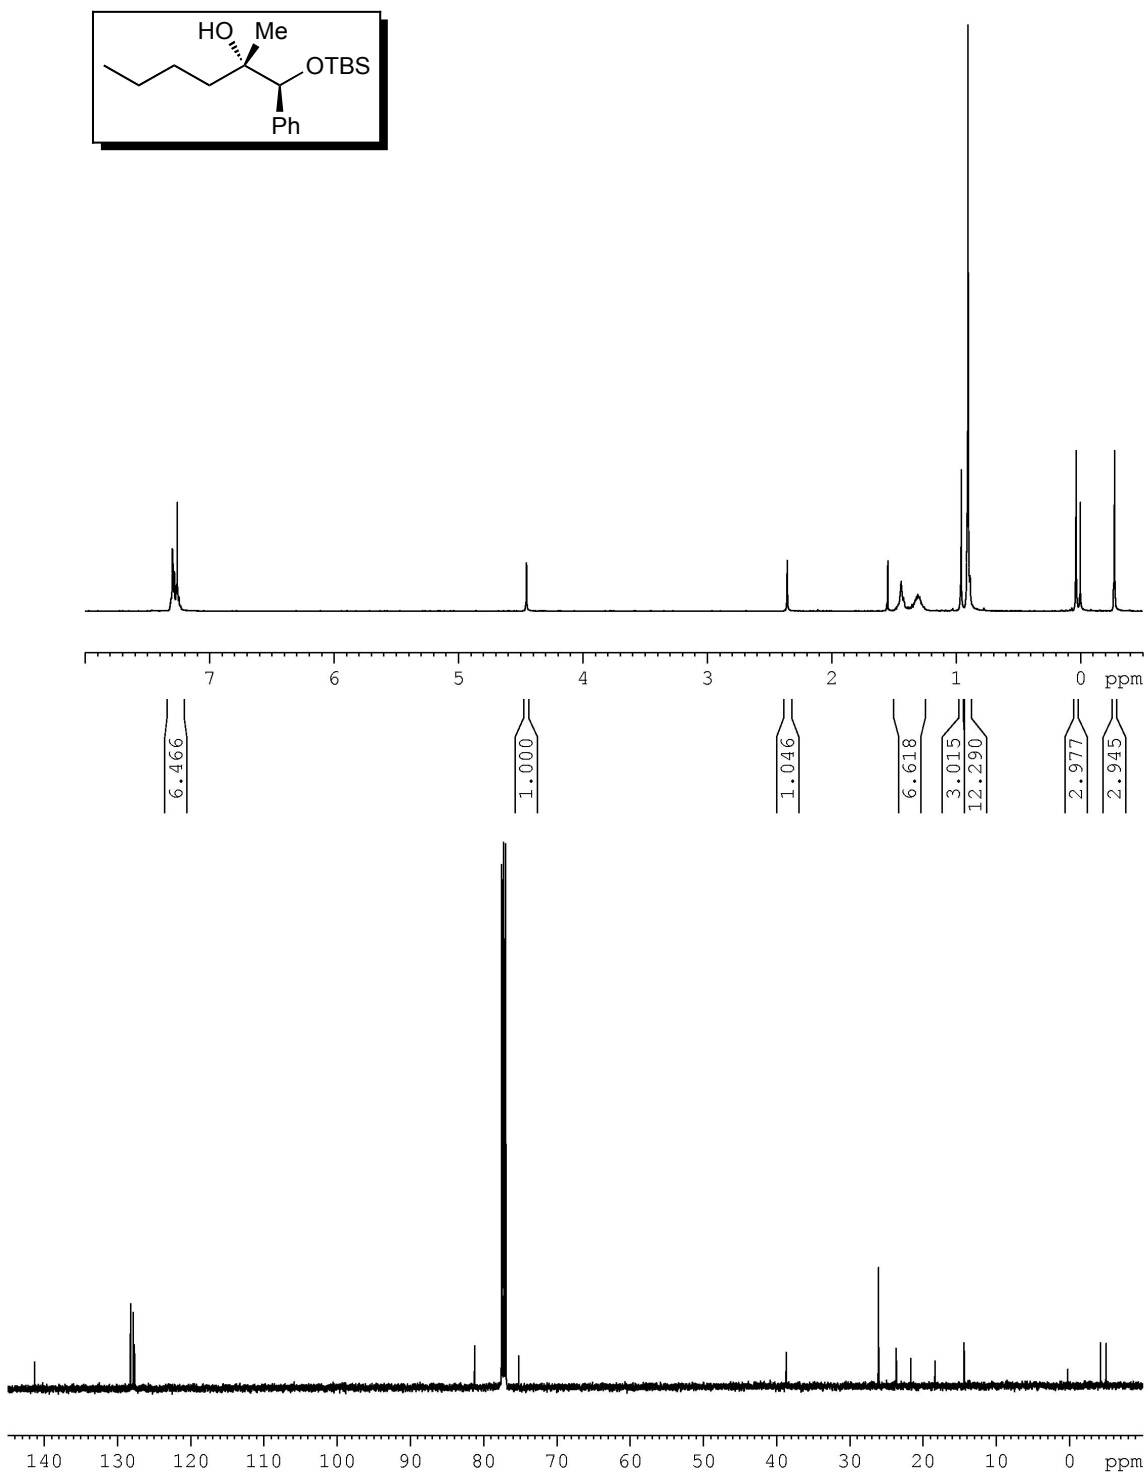

Figure SI-6. 500 MHz  $^1\text{H}$  and 125 MHz  $^{13}\text{C}\{^1\text{H}\}$  NMR in  $\text{CDCl}_3$ .

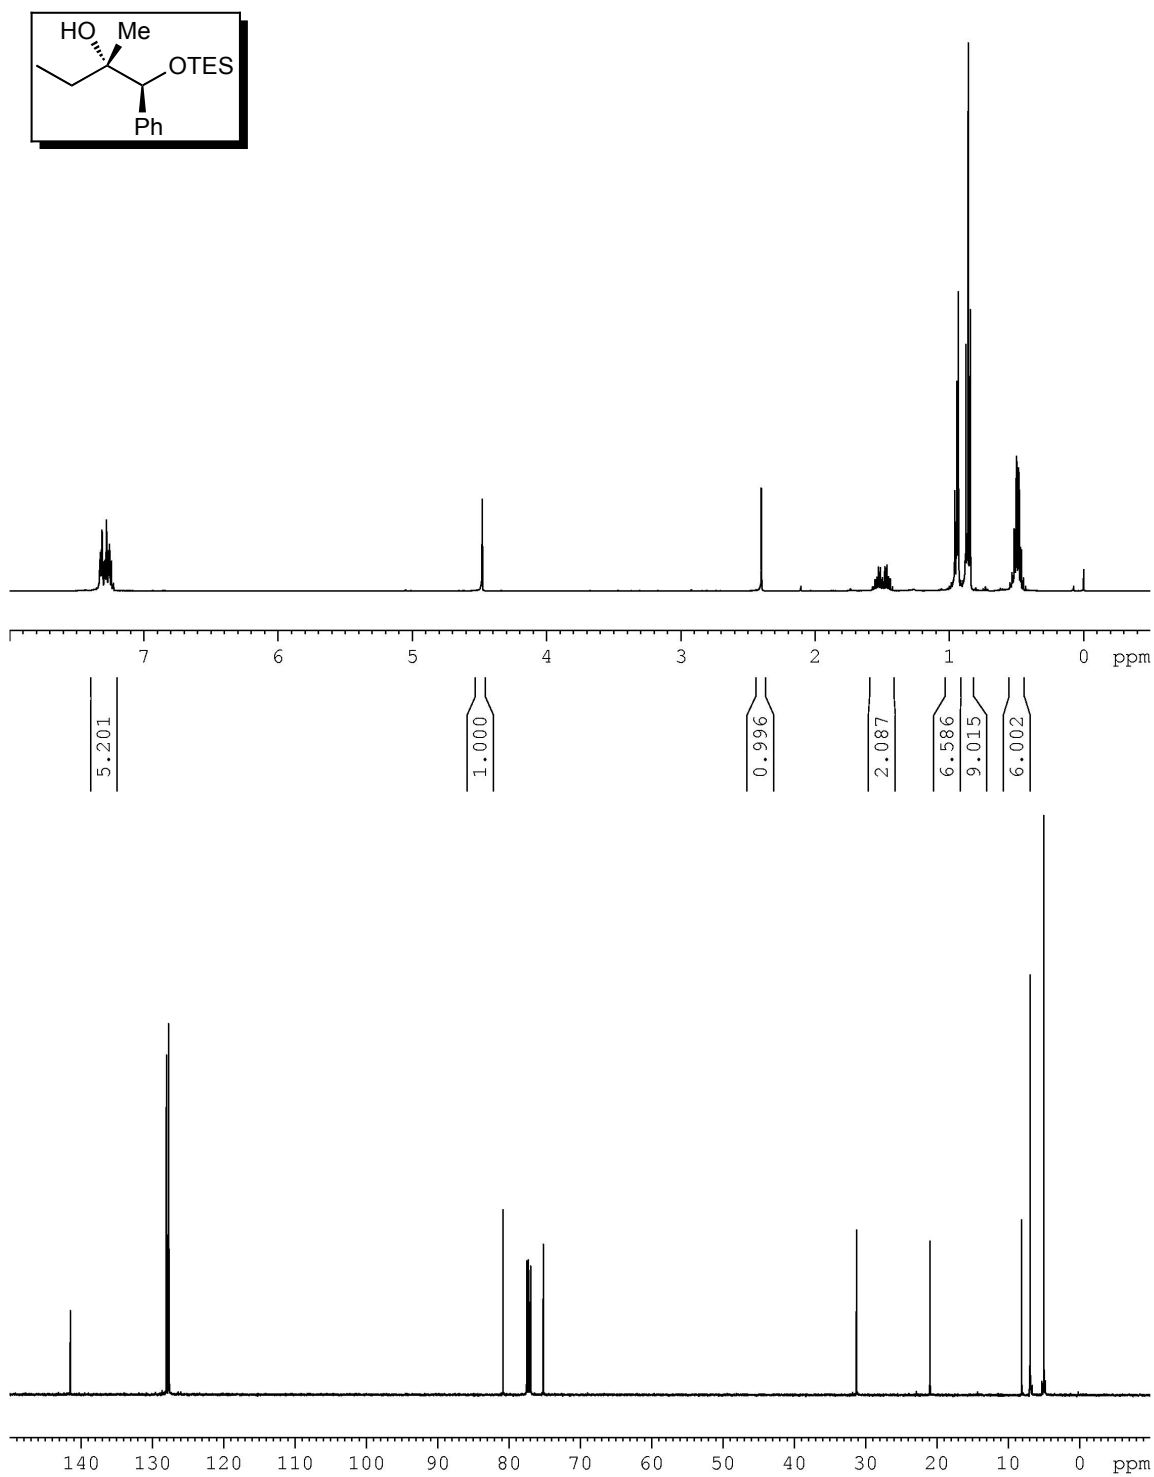

**Figure SI-7.** 500 MHz  $^1\text{H}$  and 125 MHz  $^{13}\text{C}\{^1\text{H}\}$  NMR in  $\text{CDCl}_3$ .

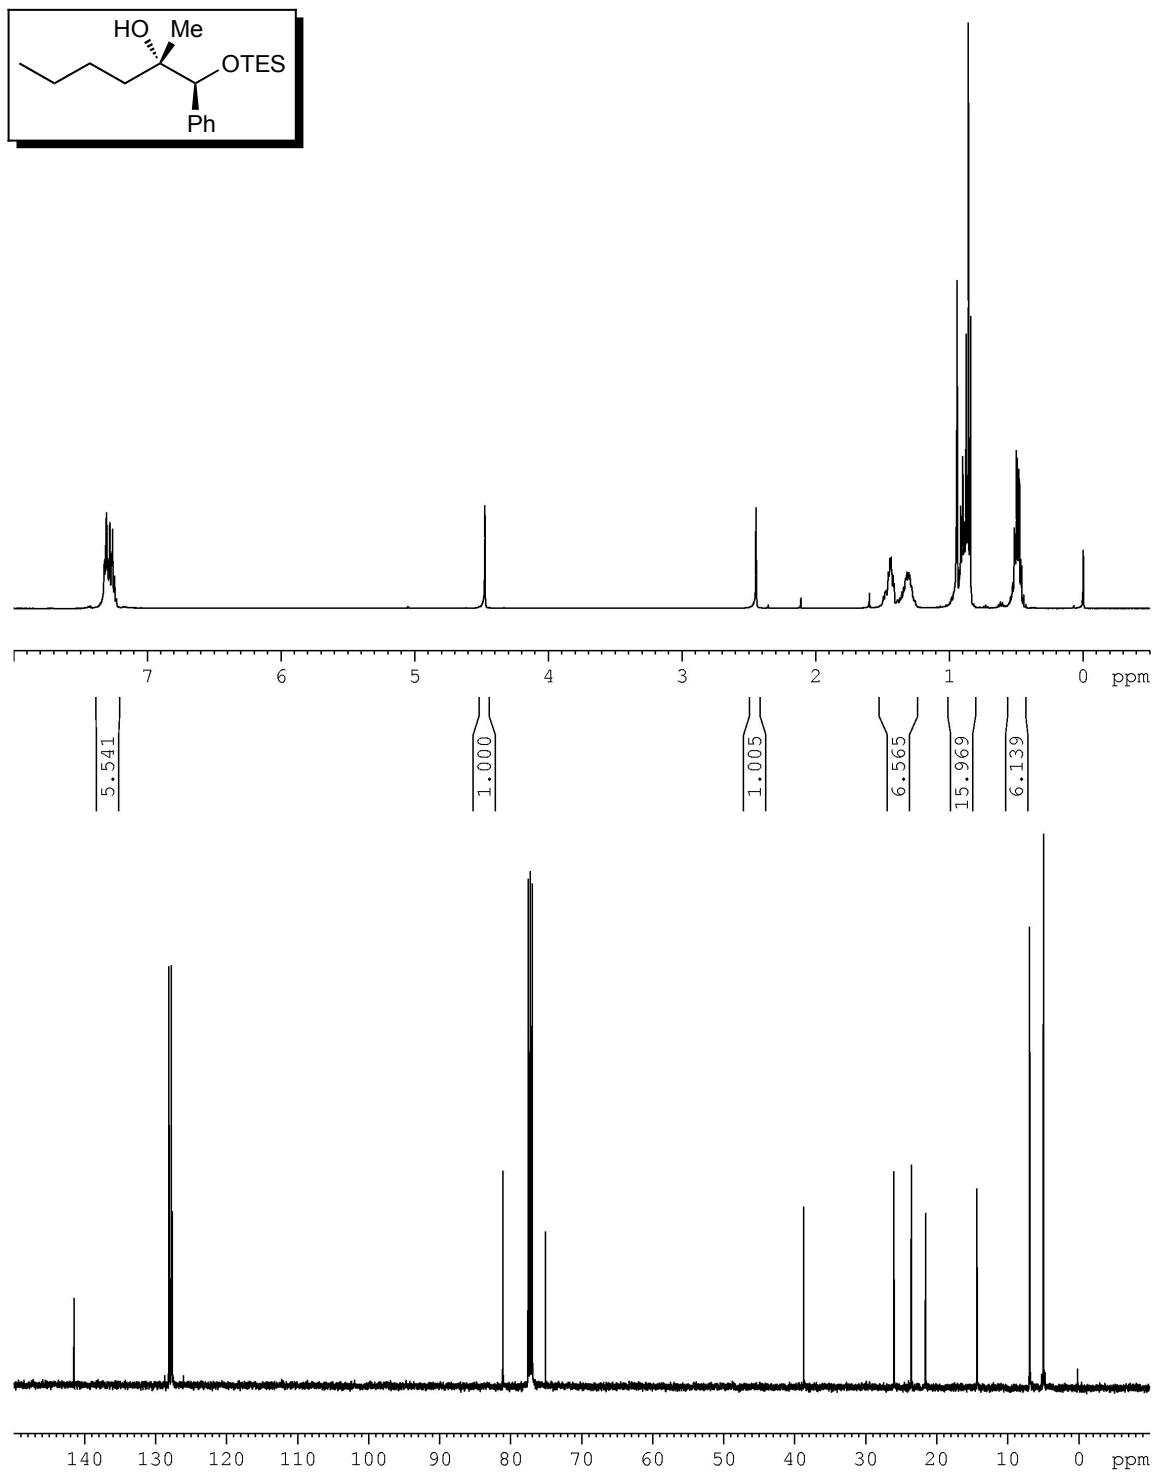

**Figure SI-8.** 500 MHz  $^1\text{H}$  and 125 MHz  $^{13}\text{C}\{^1\text{H}\}$  NMR in  $\text{CDCl}_3$ .

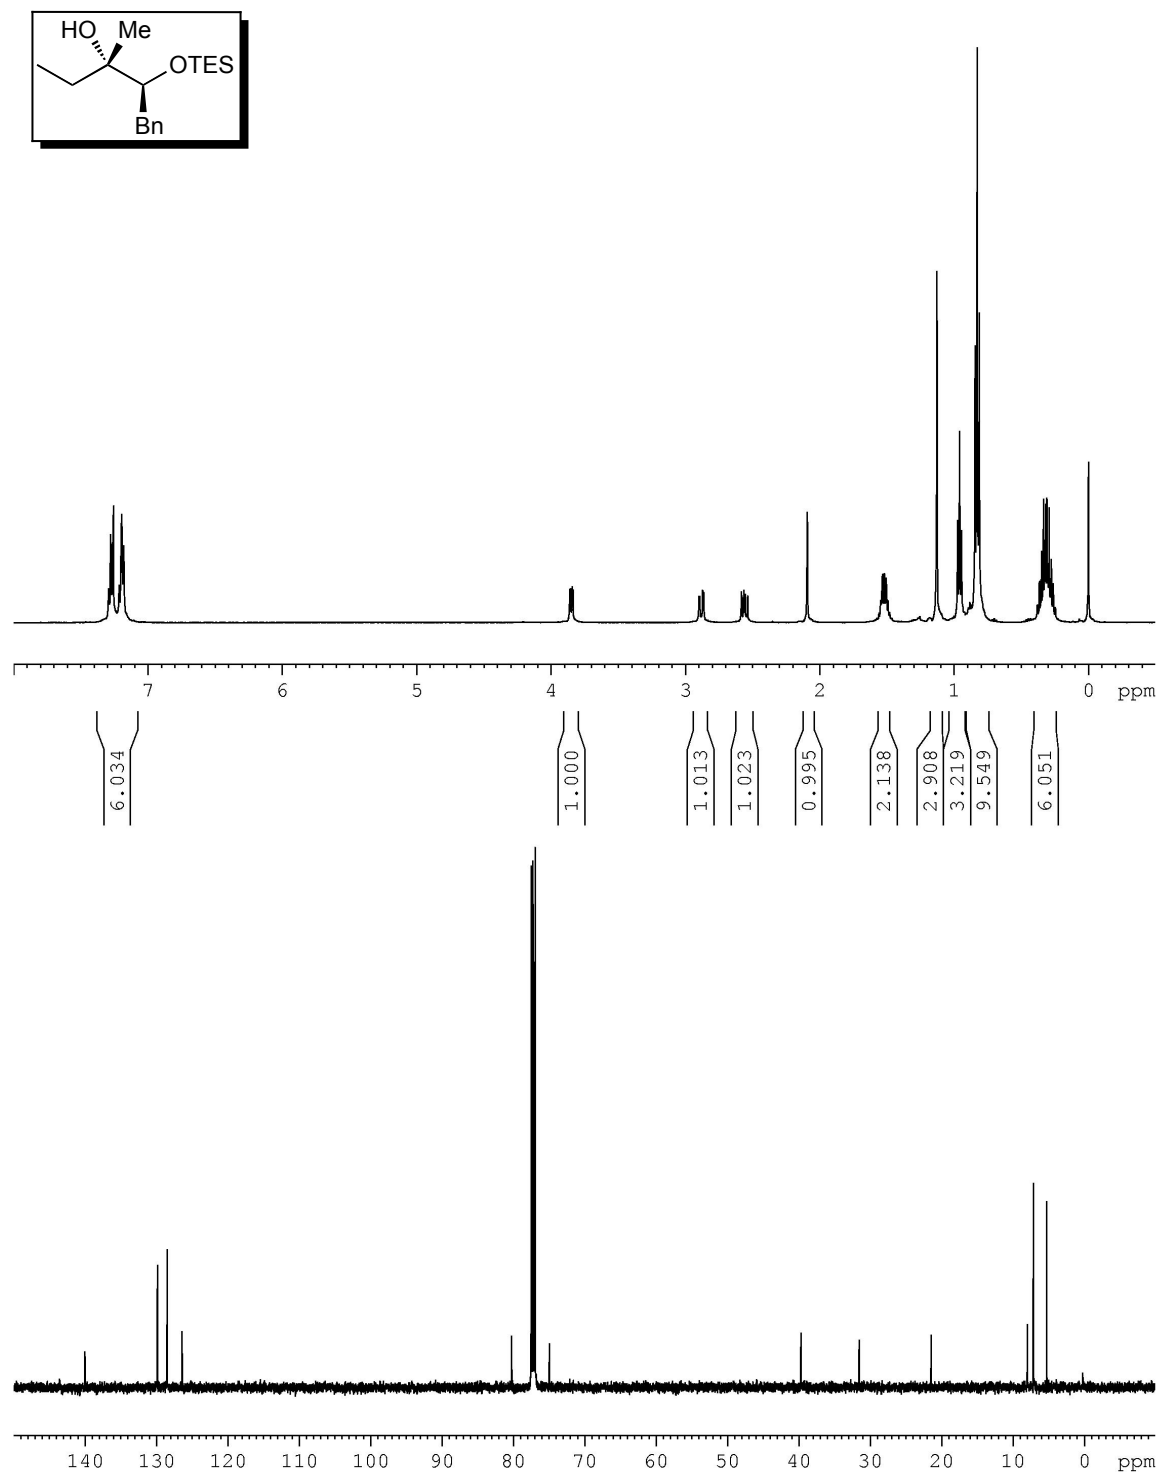

**Figure SI-9.** 500 MHz <sup>1</sup>H and 125 MHz <sup>13</sup>C{<sup>1</sup>H} NMR in CDCl<sub>3</sub>.

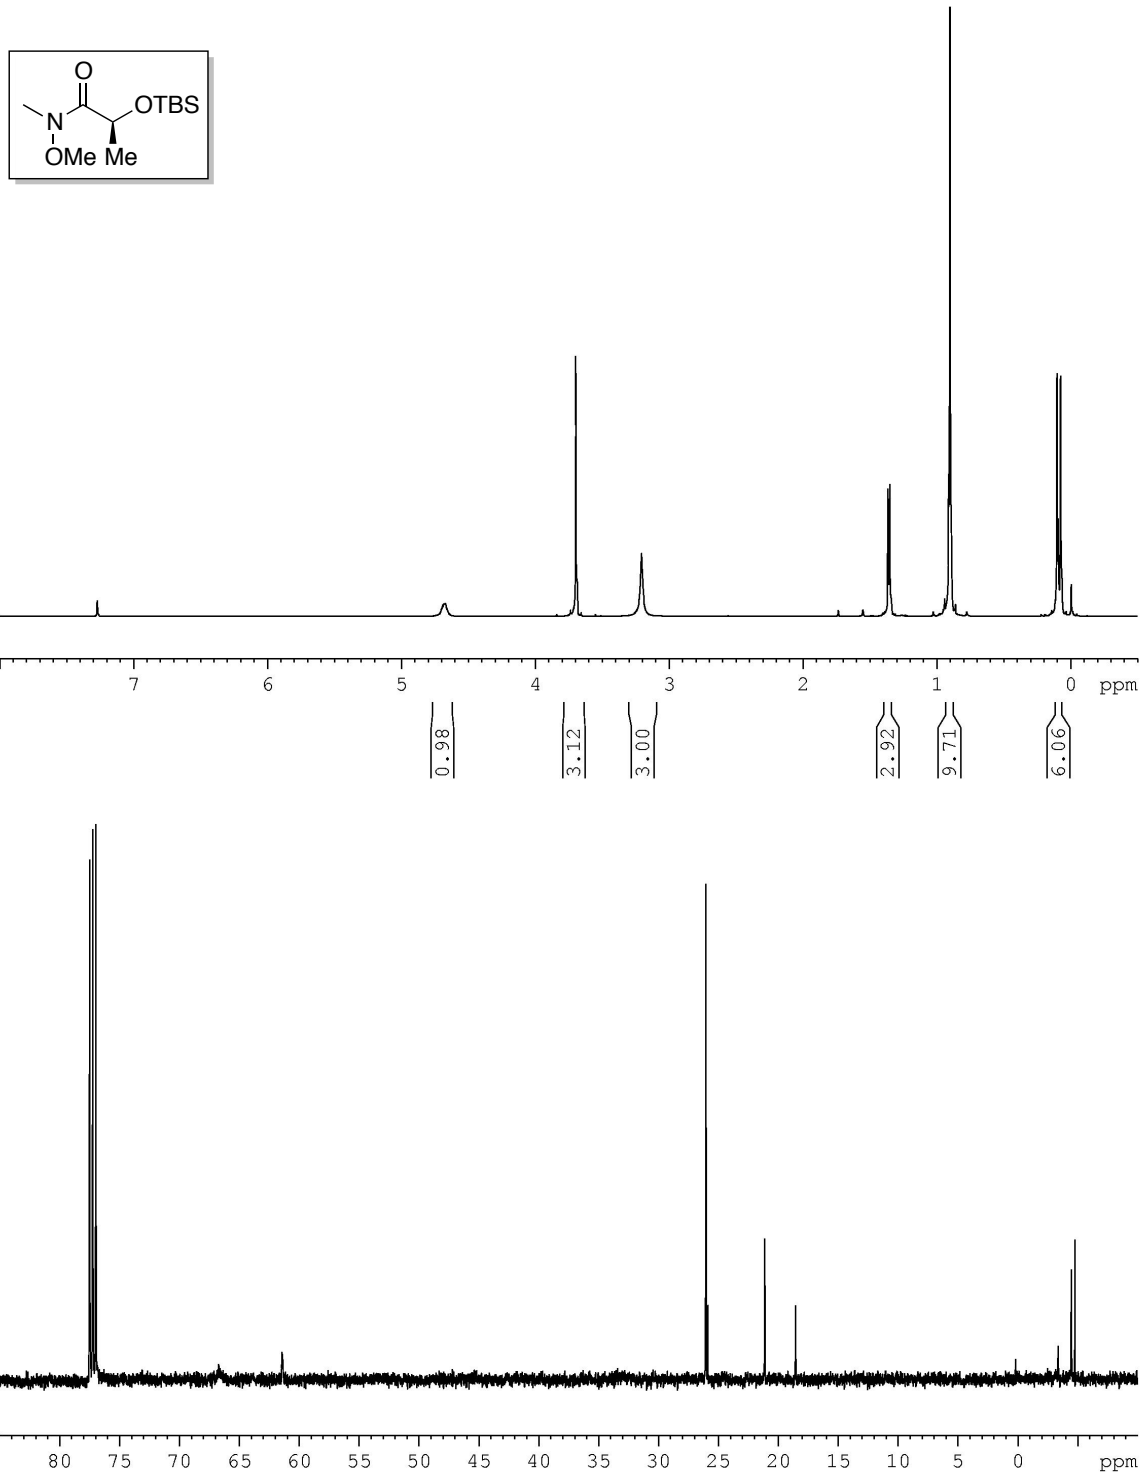

**Figure SI-10.** 500 MHz <sup>1</sup>H and 125 MHz <sup>13</sup>C{<sup>1</sup>H} NMR in CDCl<sub>3</sub>.

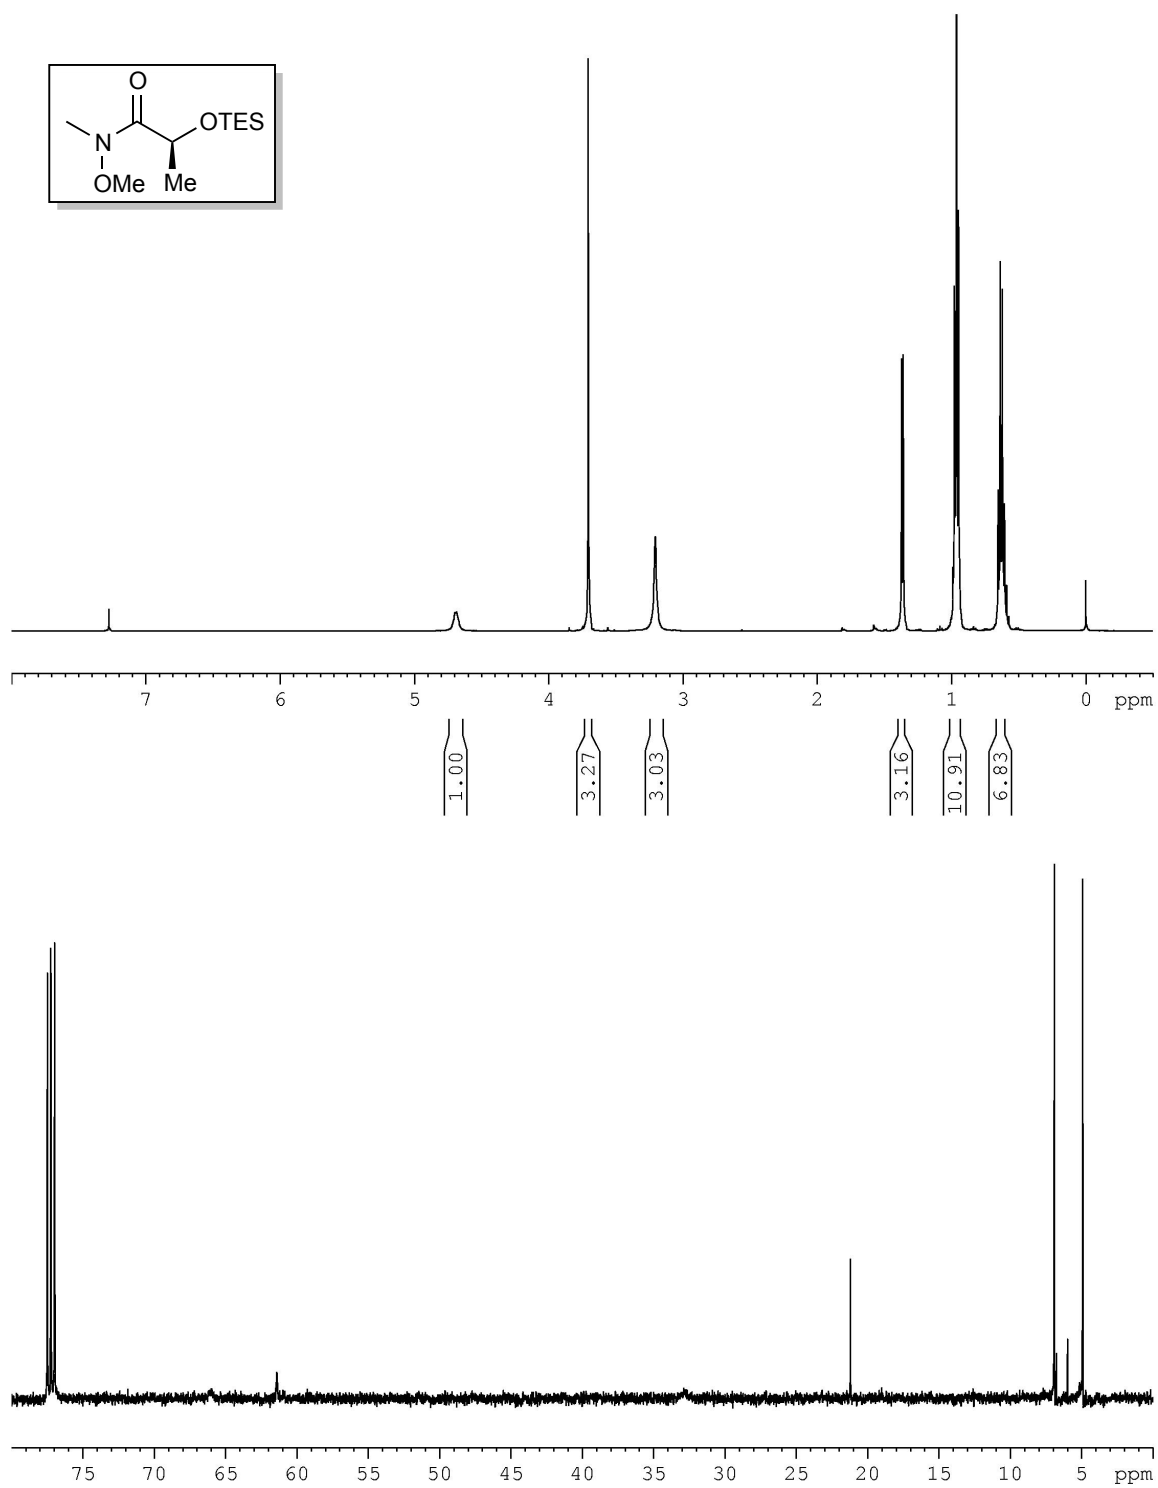

**Figure SI-11.** 500 MHz  $^1\text{H}$  and 125 MHz  $^{13}\text{C}\{^1\text{H}\}$  NMR in  $\text{CDCl}_3$ .

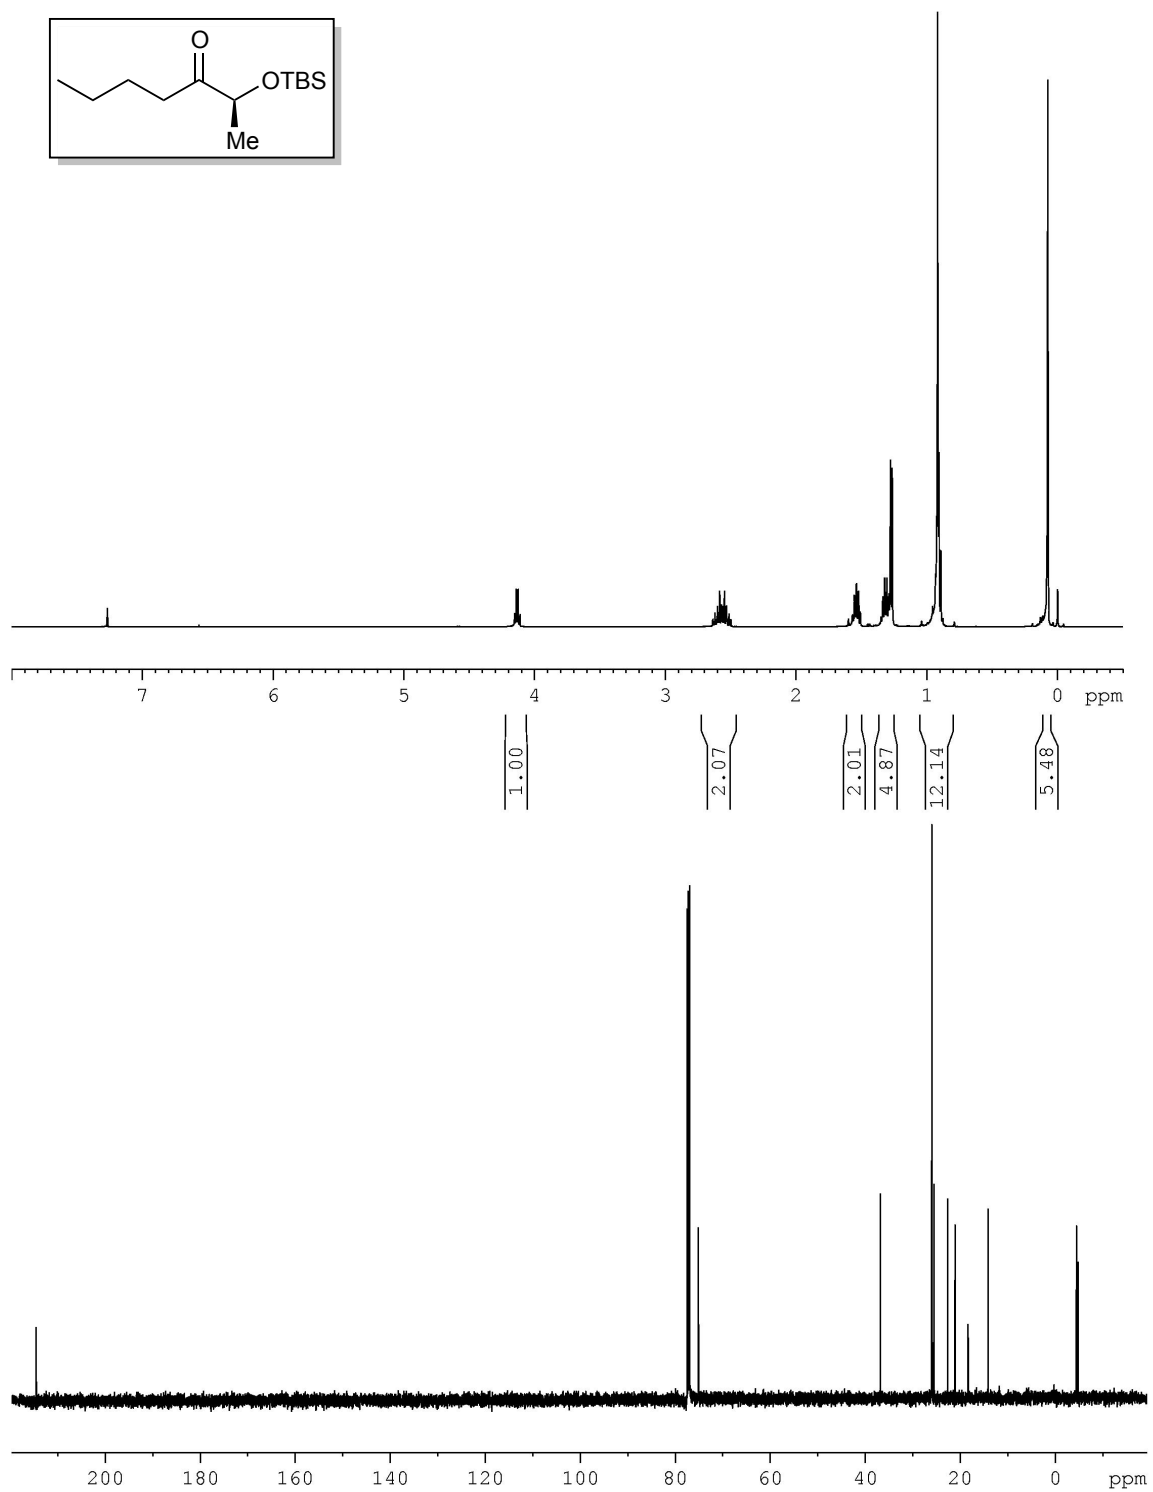

**Figure SI-12.** 500 MHz  $^1\text{H}$  and 125 MHz  $^{13}\text{C}\{^1\text{H}\}$  NMR in  $\text{CDCl}_3$ .



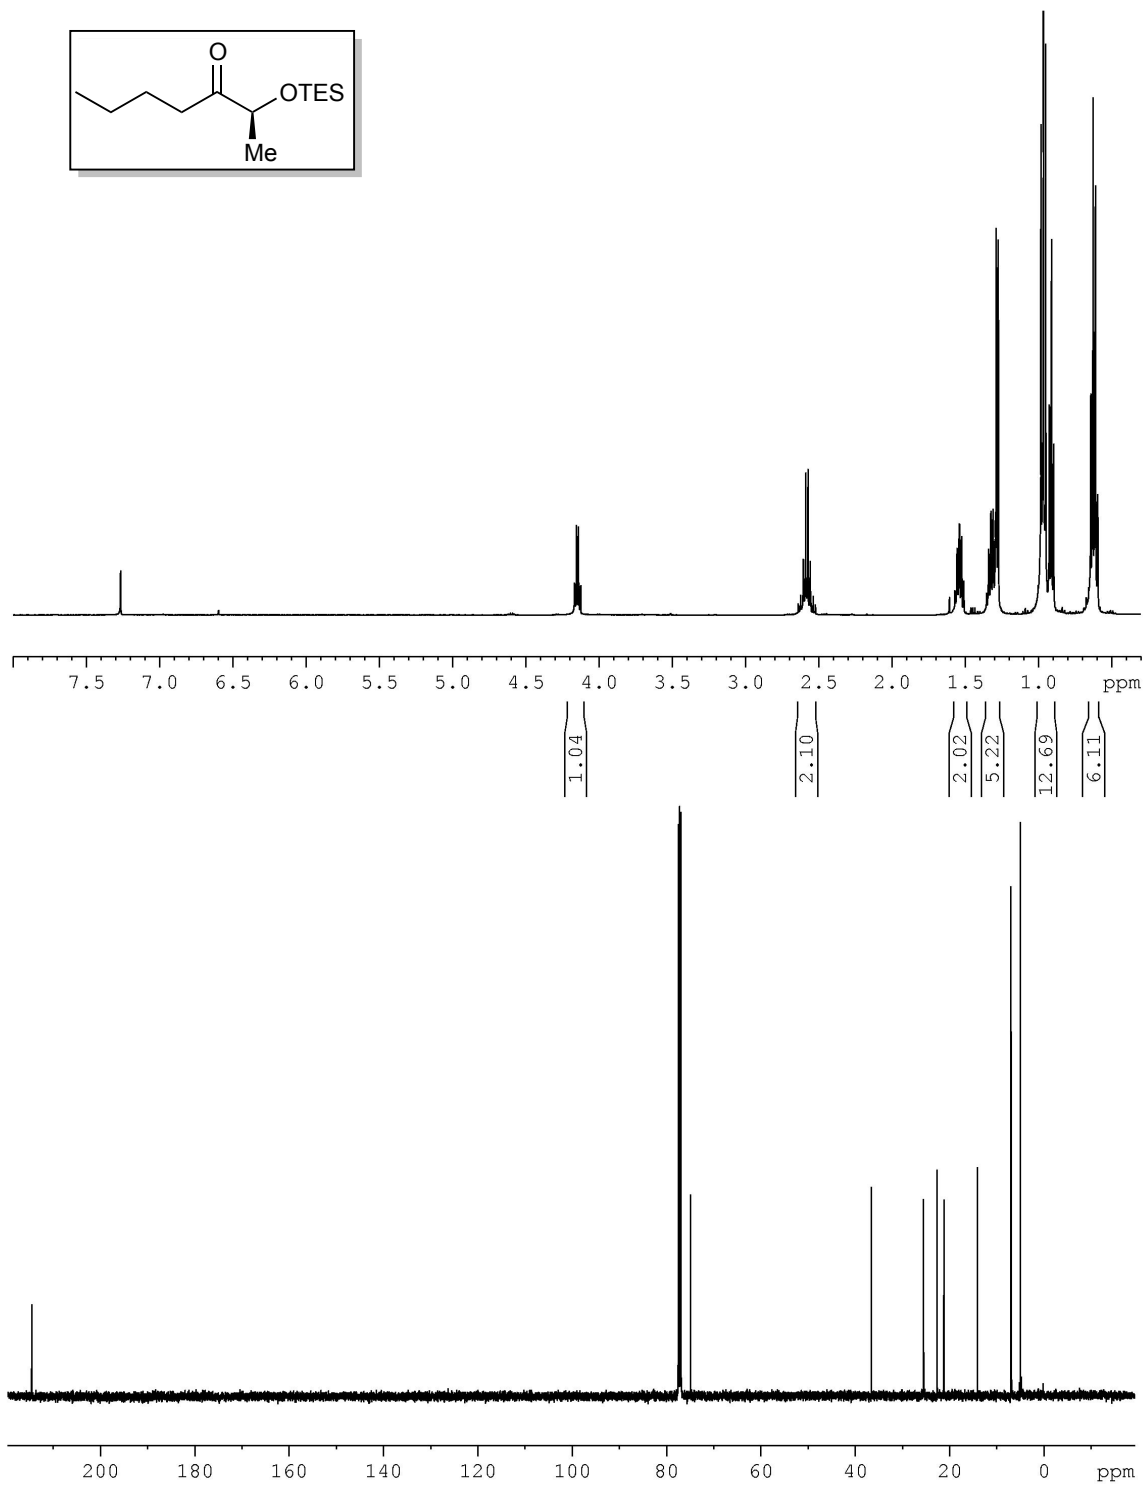

Figure SI-13. 500 MHz  $^1\text{H}$  and 125 MHz  $^{13}\text{C}\{^1\text{H}\}$  NMR in  $\text{CDCl}_3$ .

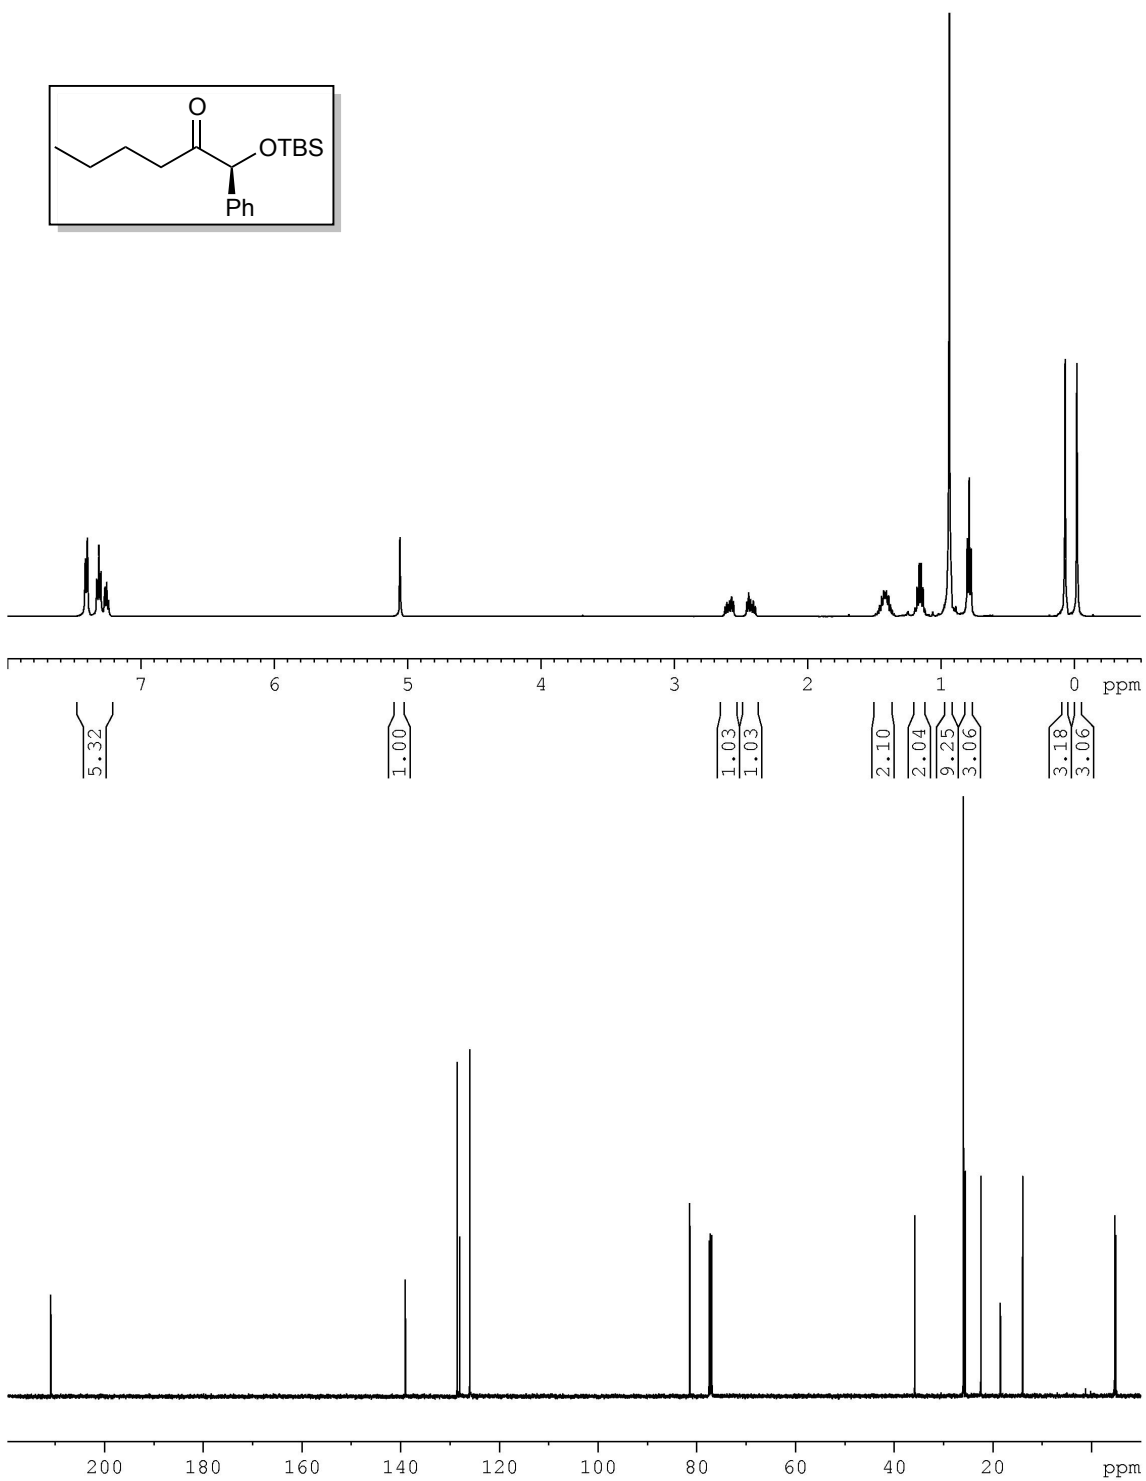

**Figure SI-14.** 500 MHz <sup>1</sup>H and 125 MHz <sup>13</sup>C{<sup>1</sup>H} NMR in CDCl<sub>3</sub>.

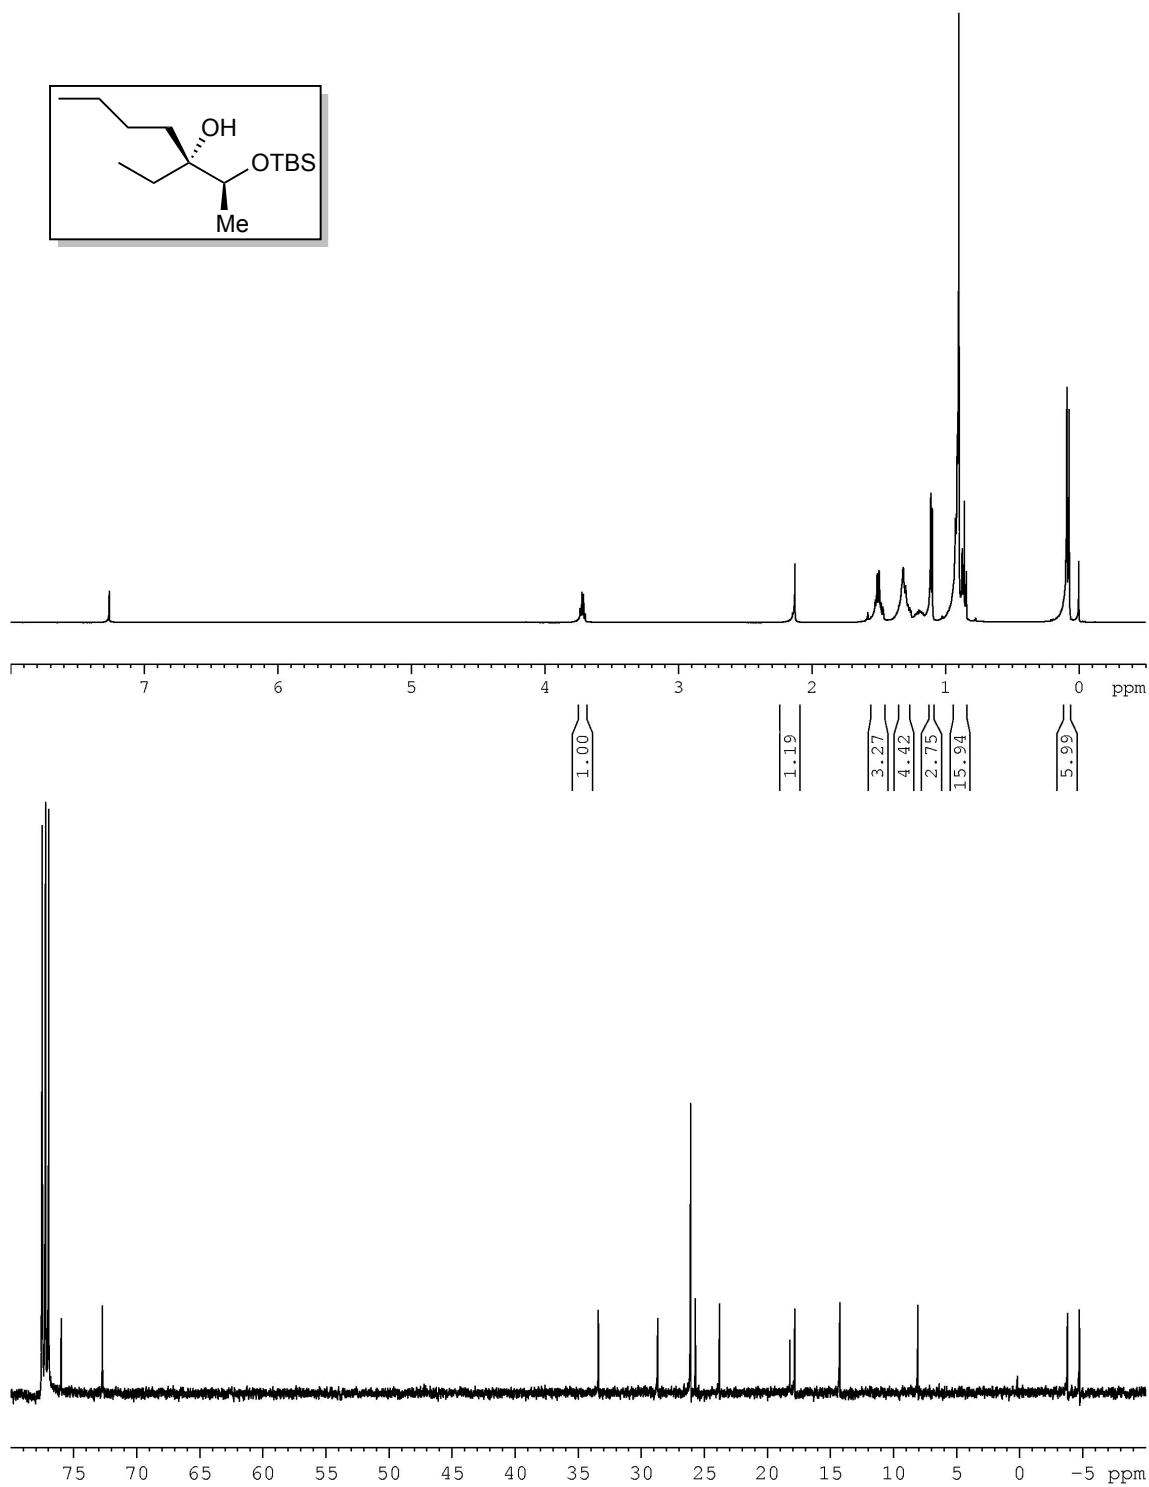

Figure SI-15. 500 MHz <sup>1</sup>H and 125 MHz <sup>13</sup>C{<sup>1</sup>H} NMR in CDCl<sub>3</sub>.

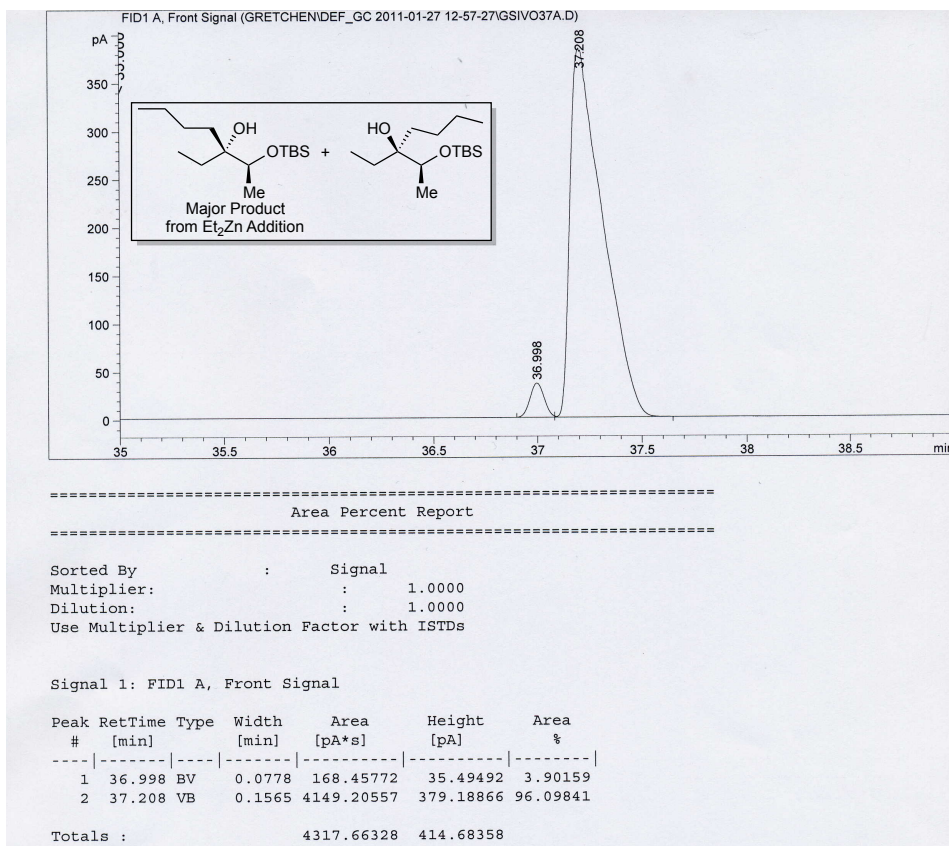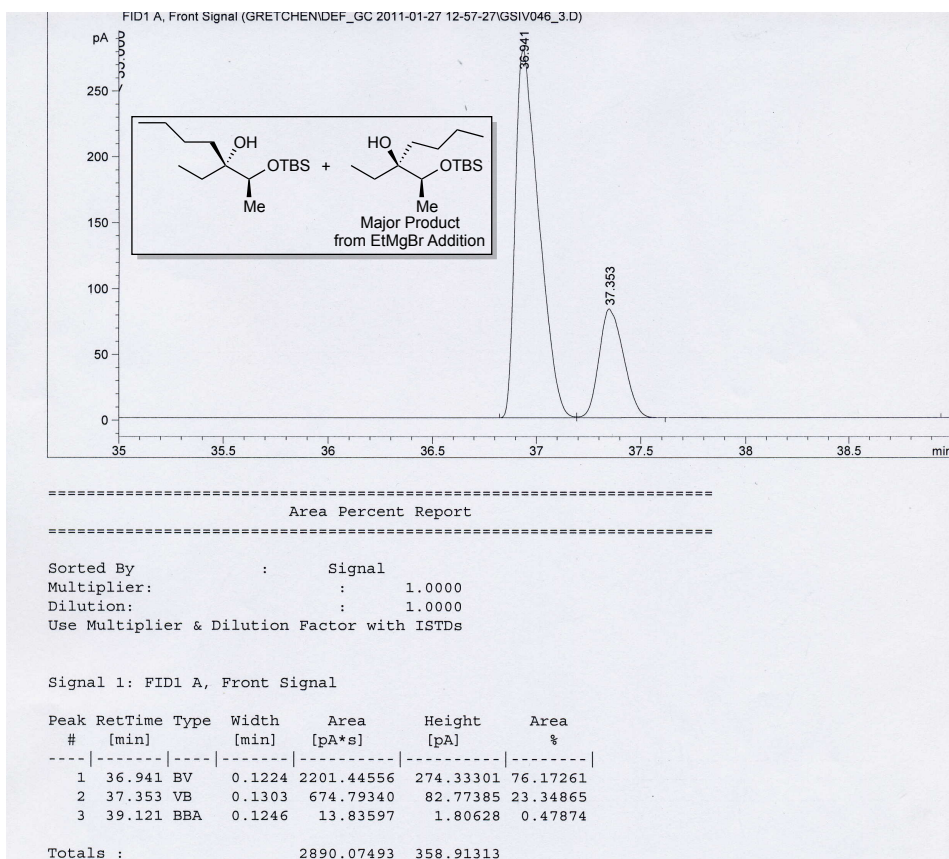

Figure SI-16. GC analysis of ethyl addition to butyl silyloxyketone.

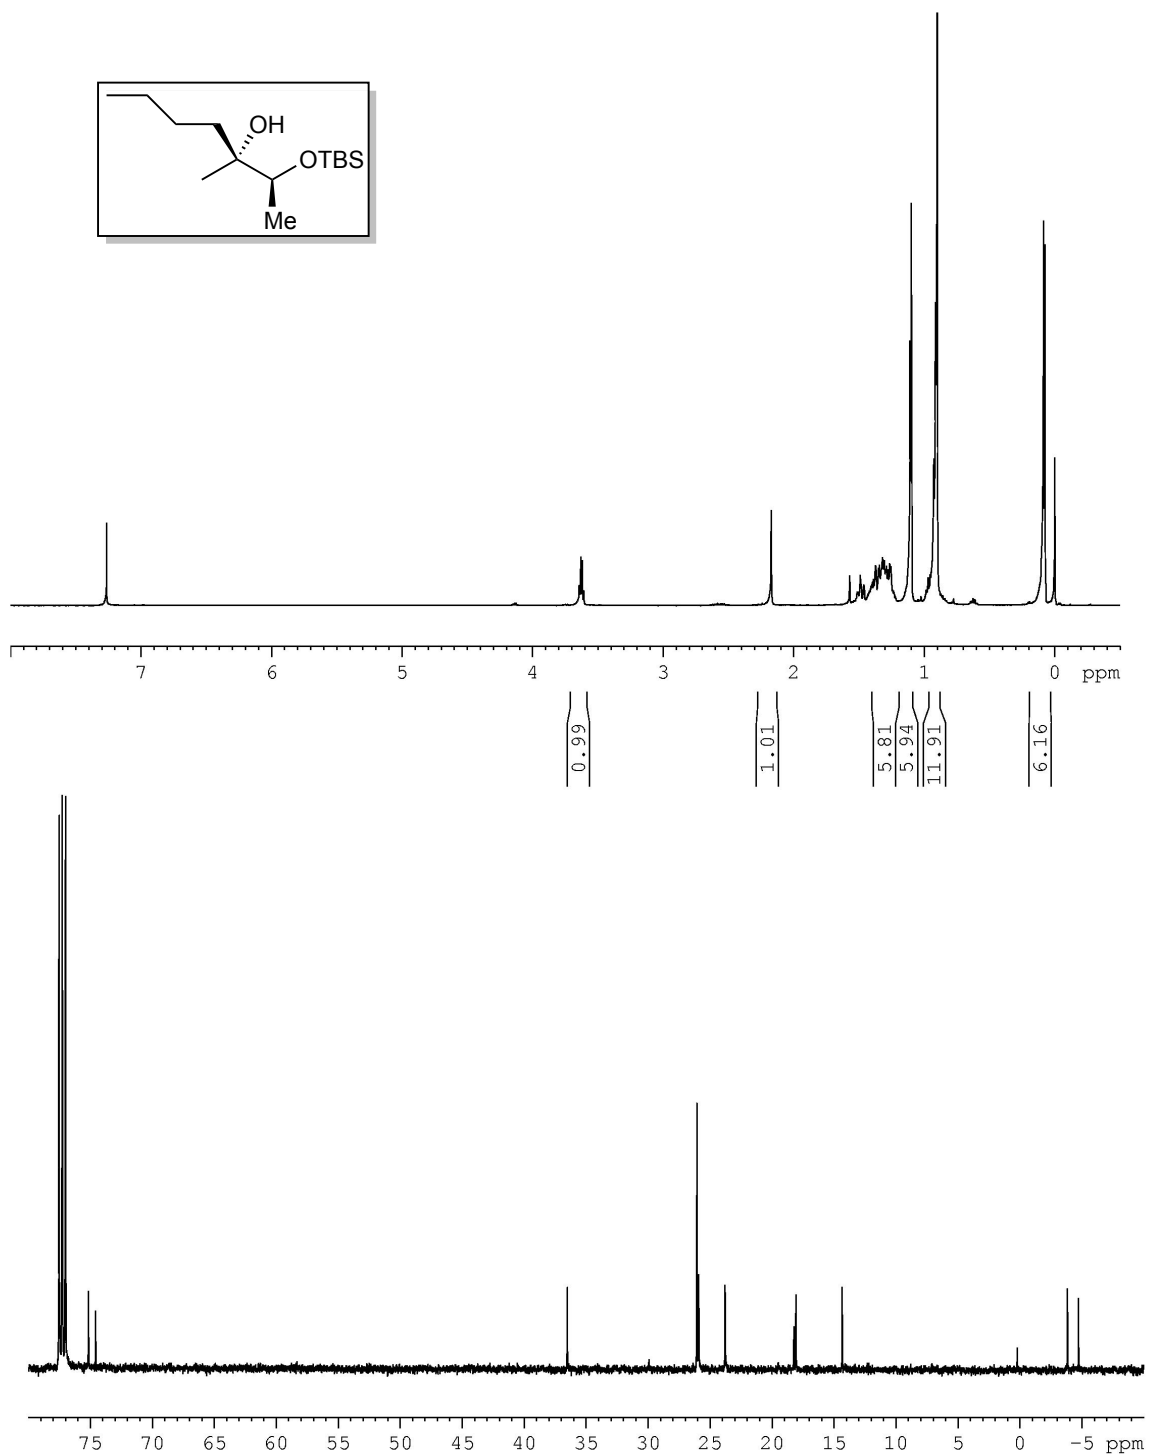

**Figure SI-17.** 500 MHz <sup>1</sup>H and 125 MHz <sup>13</sup>C{<sup>1</sup>H} NMR in CDCl<sub>3</sub>.

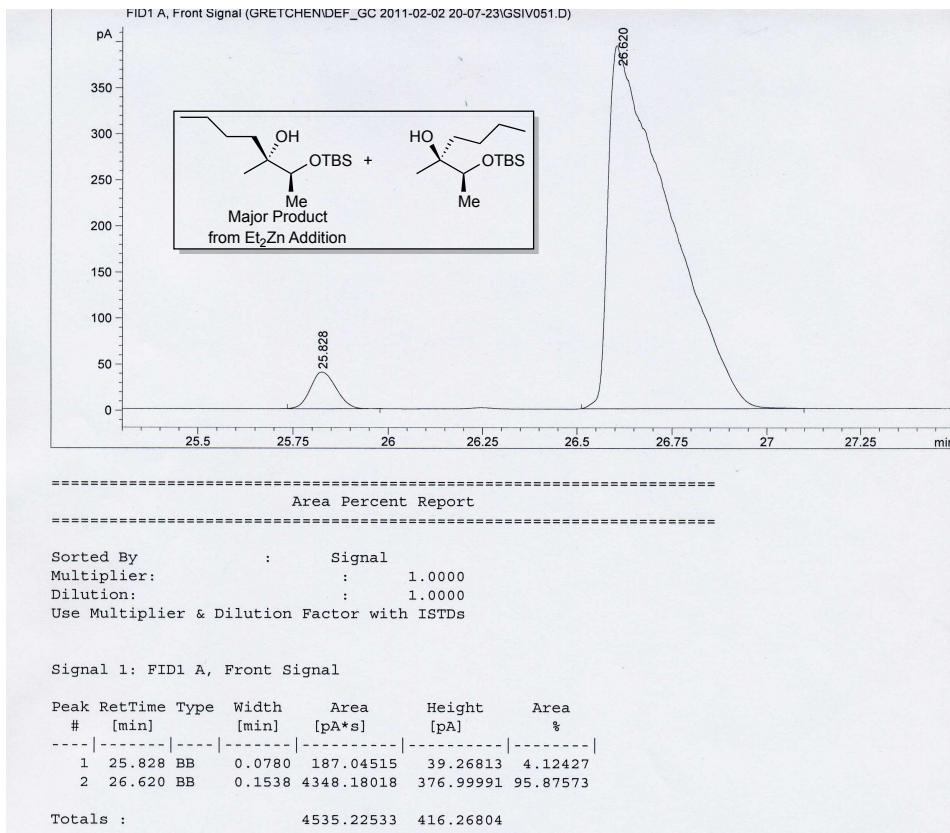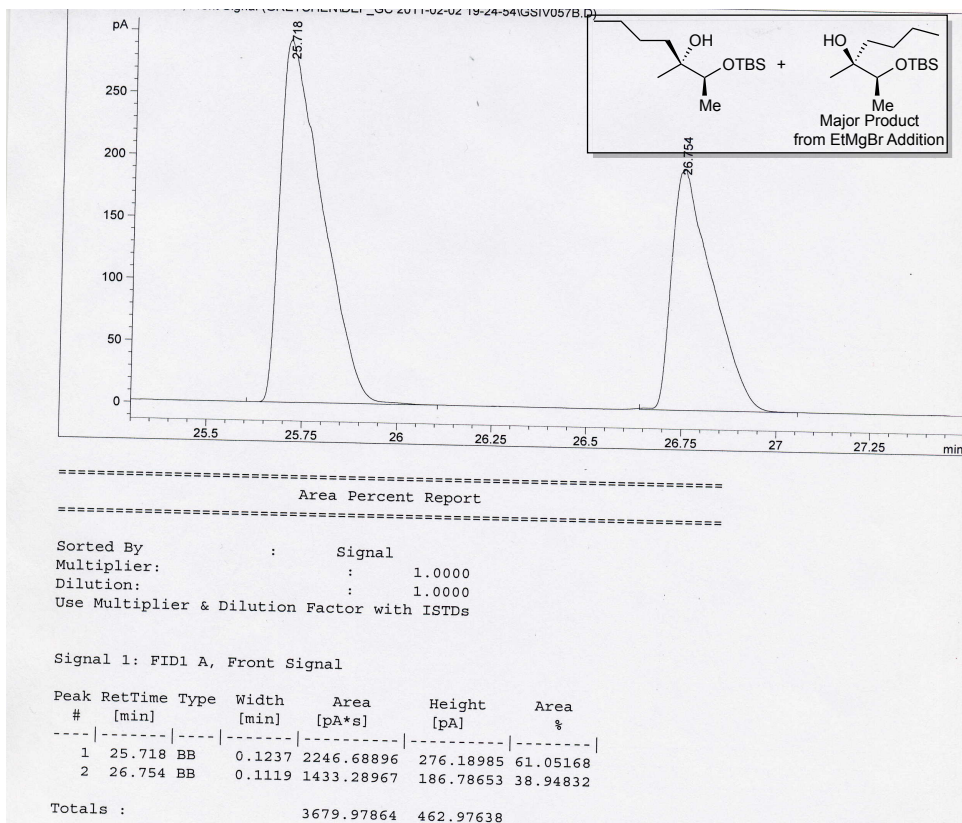

Figure SI-18. GC analysis of methyl addition to butyl silyloxyketone.

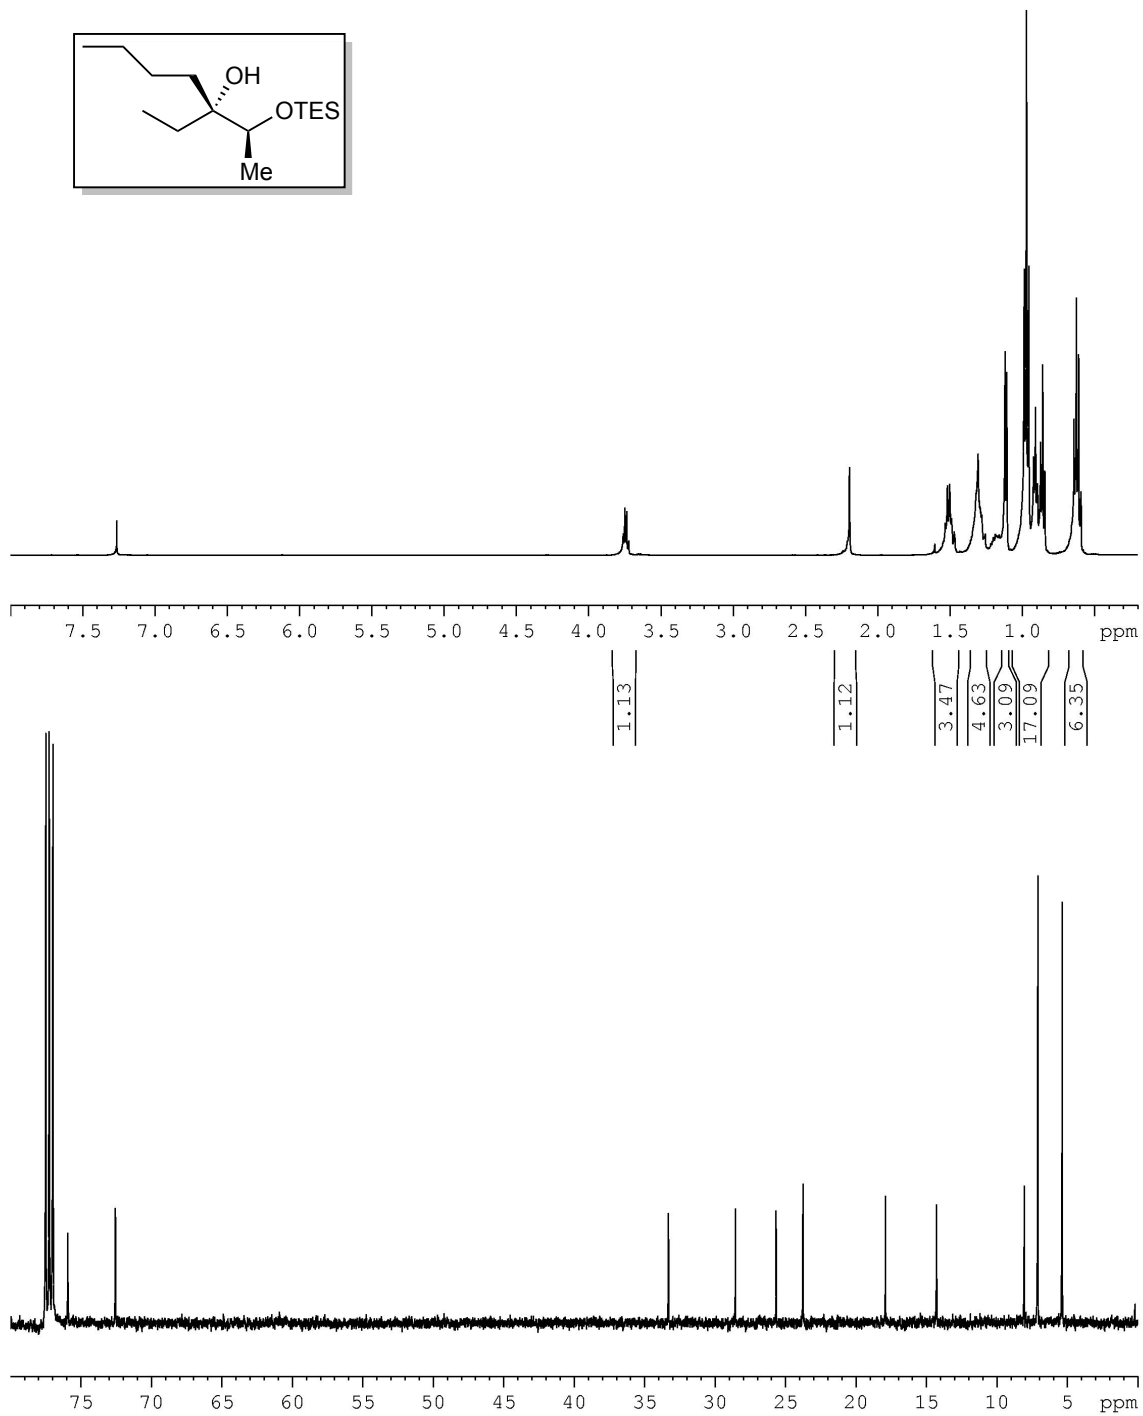

**Figure SI-19.** 500 MHz  $^1\text{H}$  and 125 MHz  $^{13}\text{C}\{^1\text{H}\}$  NMR in  $\text{CDCl}_3$ .

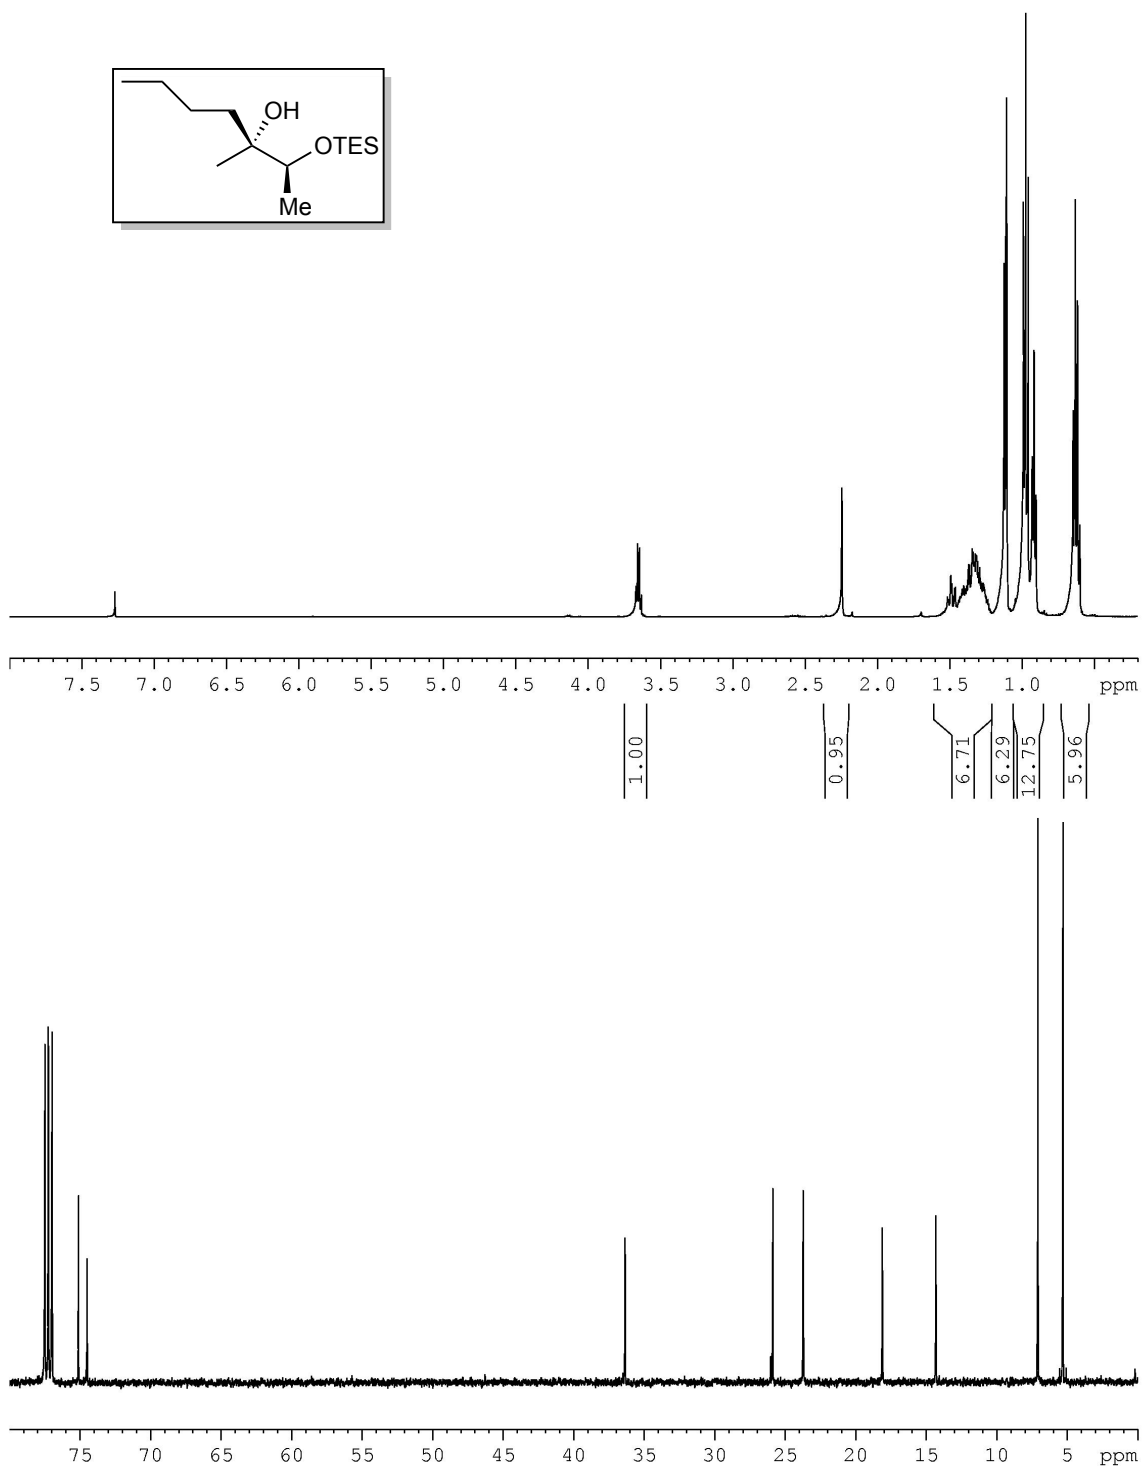

Figure SI-20. 500 MHz <sup>1</sup>H and 125 MHz <sup>13</sup>C{<sup>1</sup>H} NMR in CDCl<sub>3</sub>.



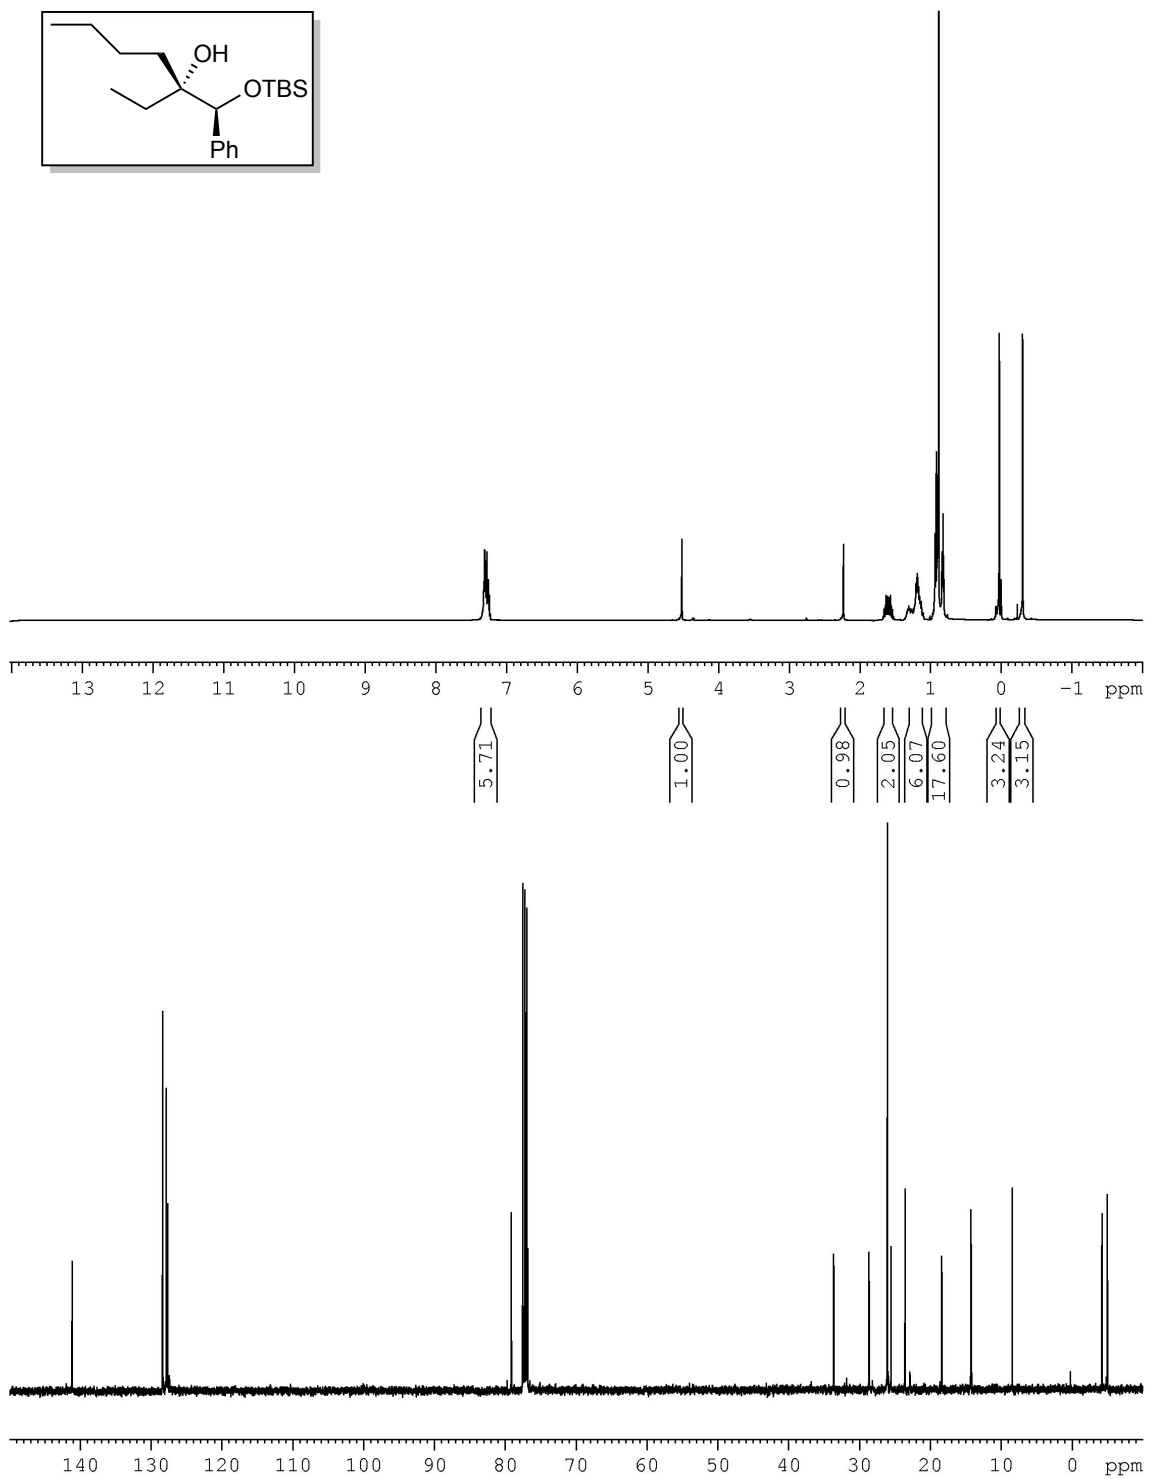

**Figure SI-21.** 500 MHz  $^1\text{H}$  and 125 MHz  $^{13}\text{C}\{^1\text{H}\}$  NMR in  $\text{CDCl}_3$ .

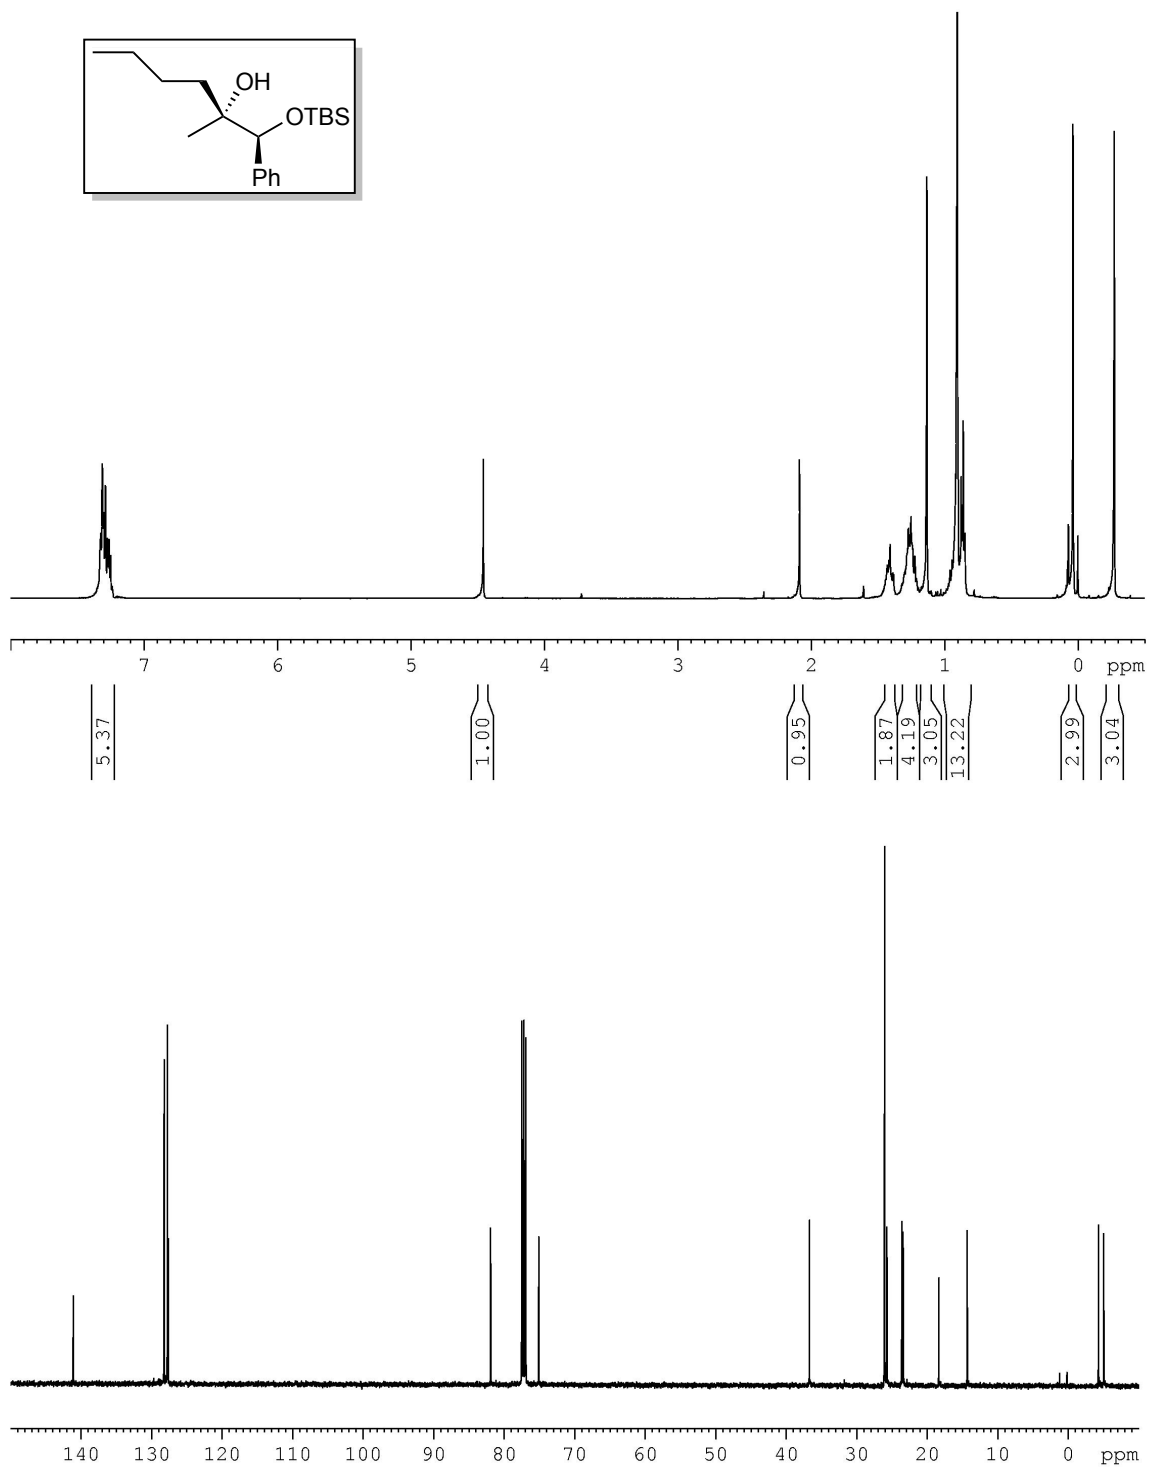

**Figure SI-22.** 500 MHz  $^1\text{H}$  and 125 MHz  $^{13}\text{C}\{^1\text{H}\}$  NMR in  $\text{CDCl}_3$ .

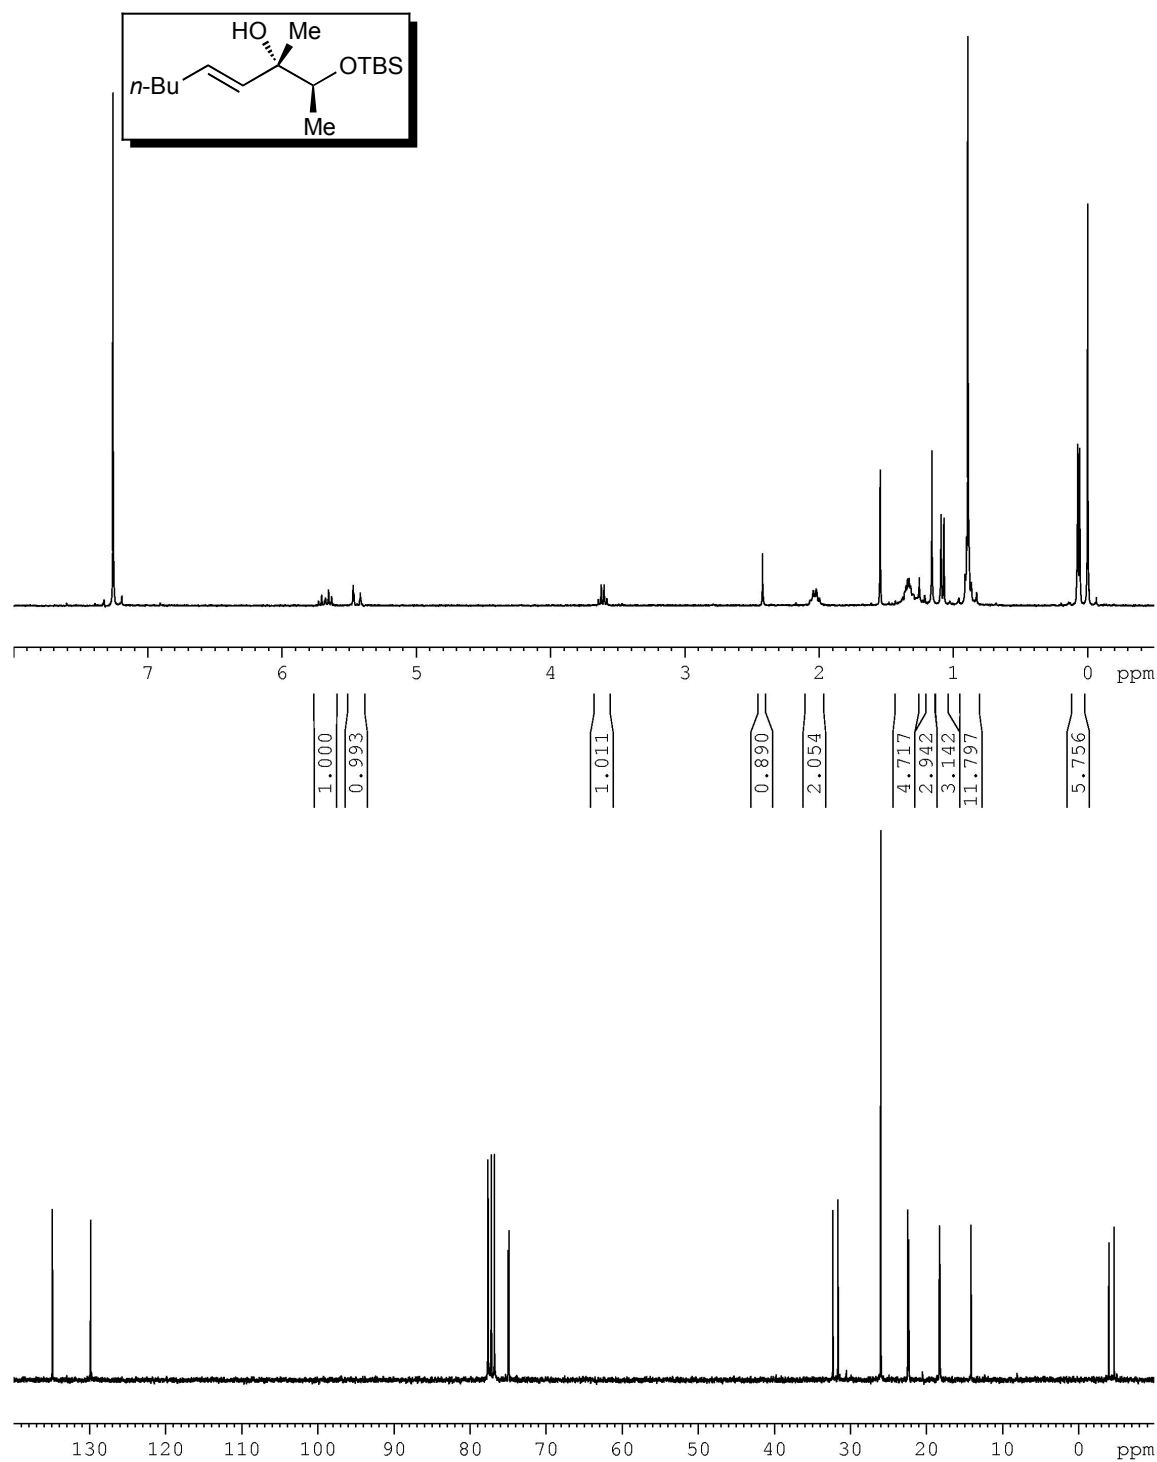

**Figure SI-23.** 300 MHz  $^1\text{H}$  and 125 MHz  $^{13}\text{C}\{^1\text{H}\}$  NMR in  $\text{CDCl}_3$ .

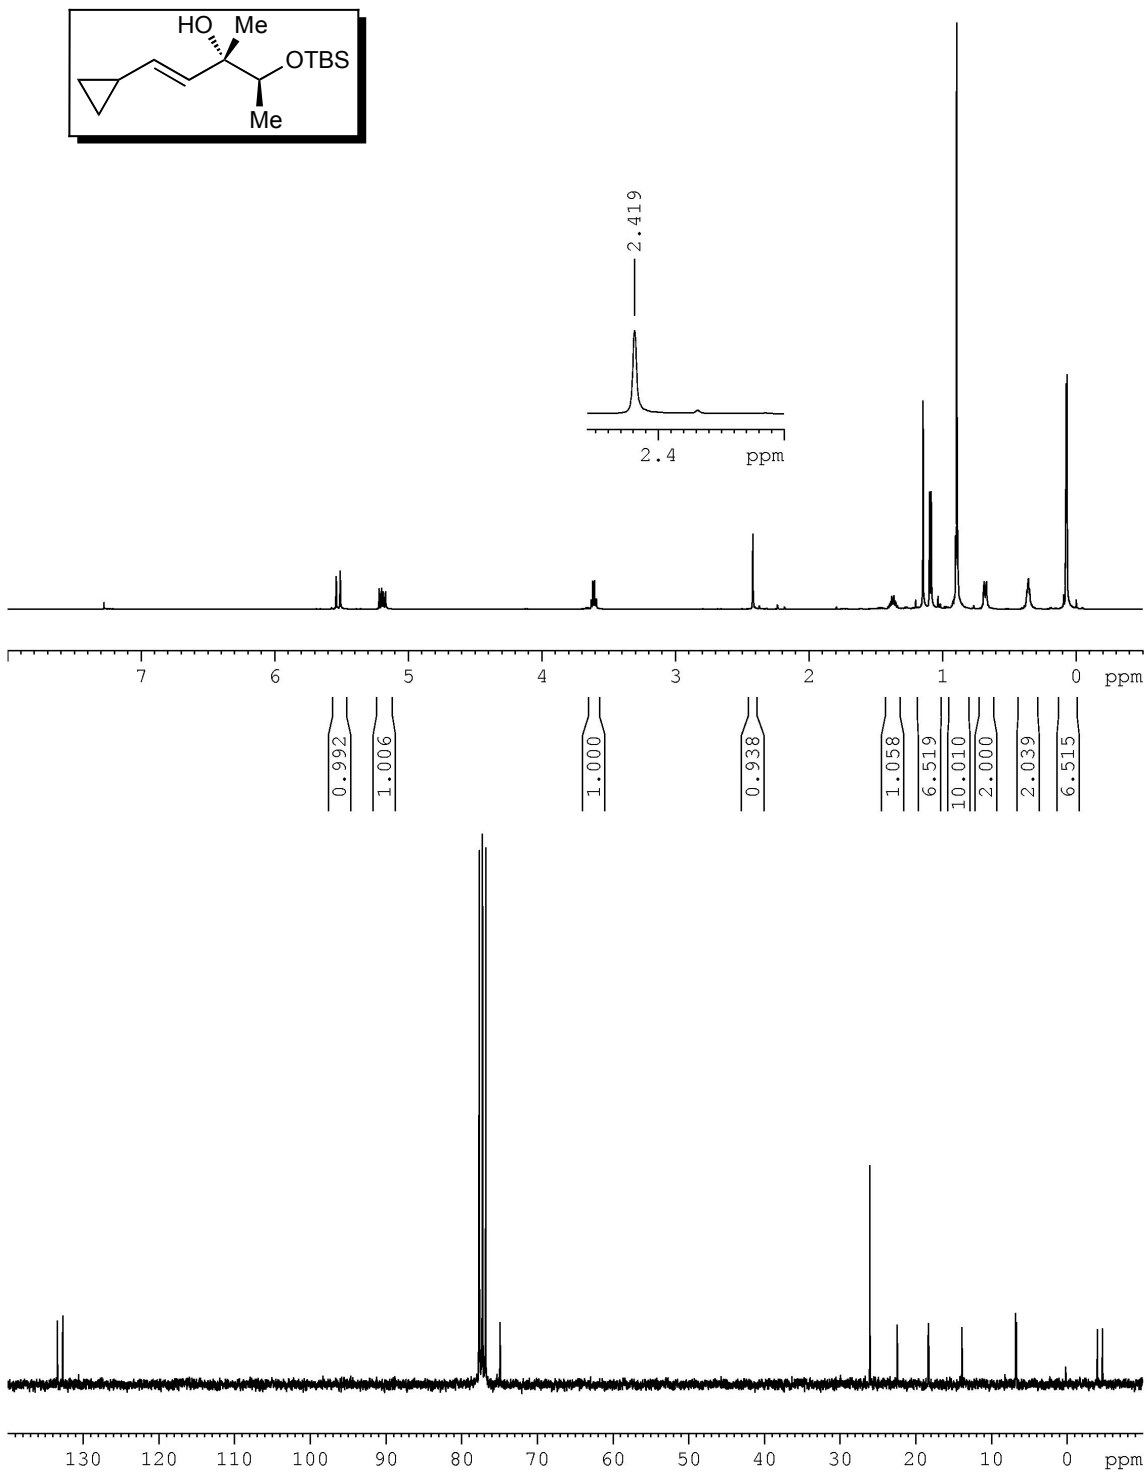

**Figure SI-24.** 500 MHz <sup>1</sup>H and 125 MHz <sup>13</sup>C{<sup>1</sup>H} NMR in CDCl<sub>3</sub>.

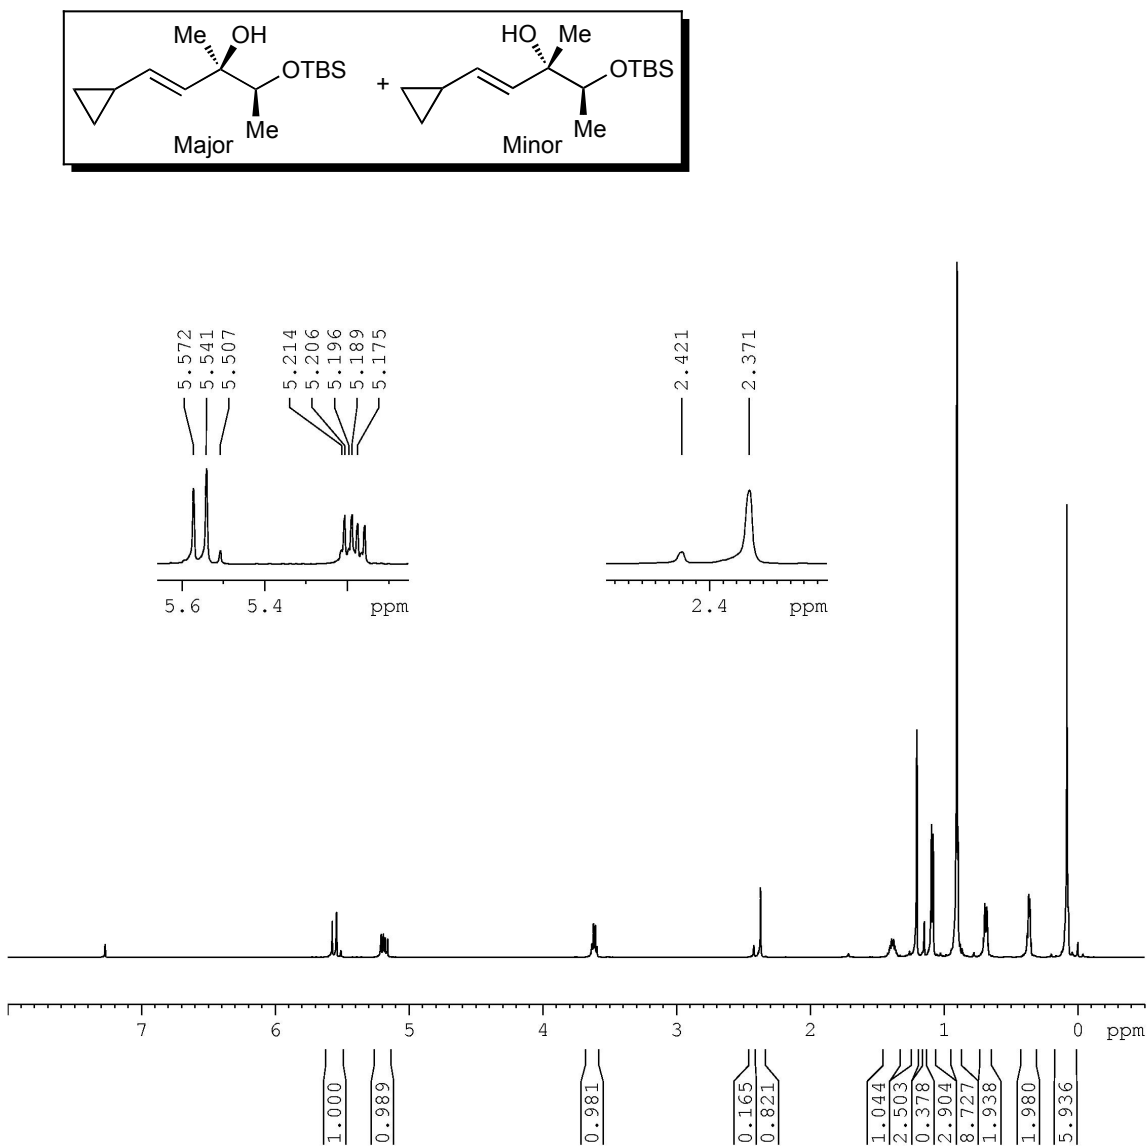

Figure SI-25. 500 MHz <sup>1</sup>H NMR in CDCl<sub>3</sub> (from vinyl lithium addition).

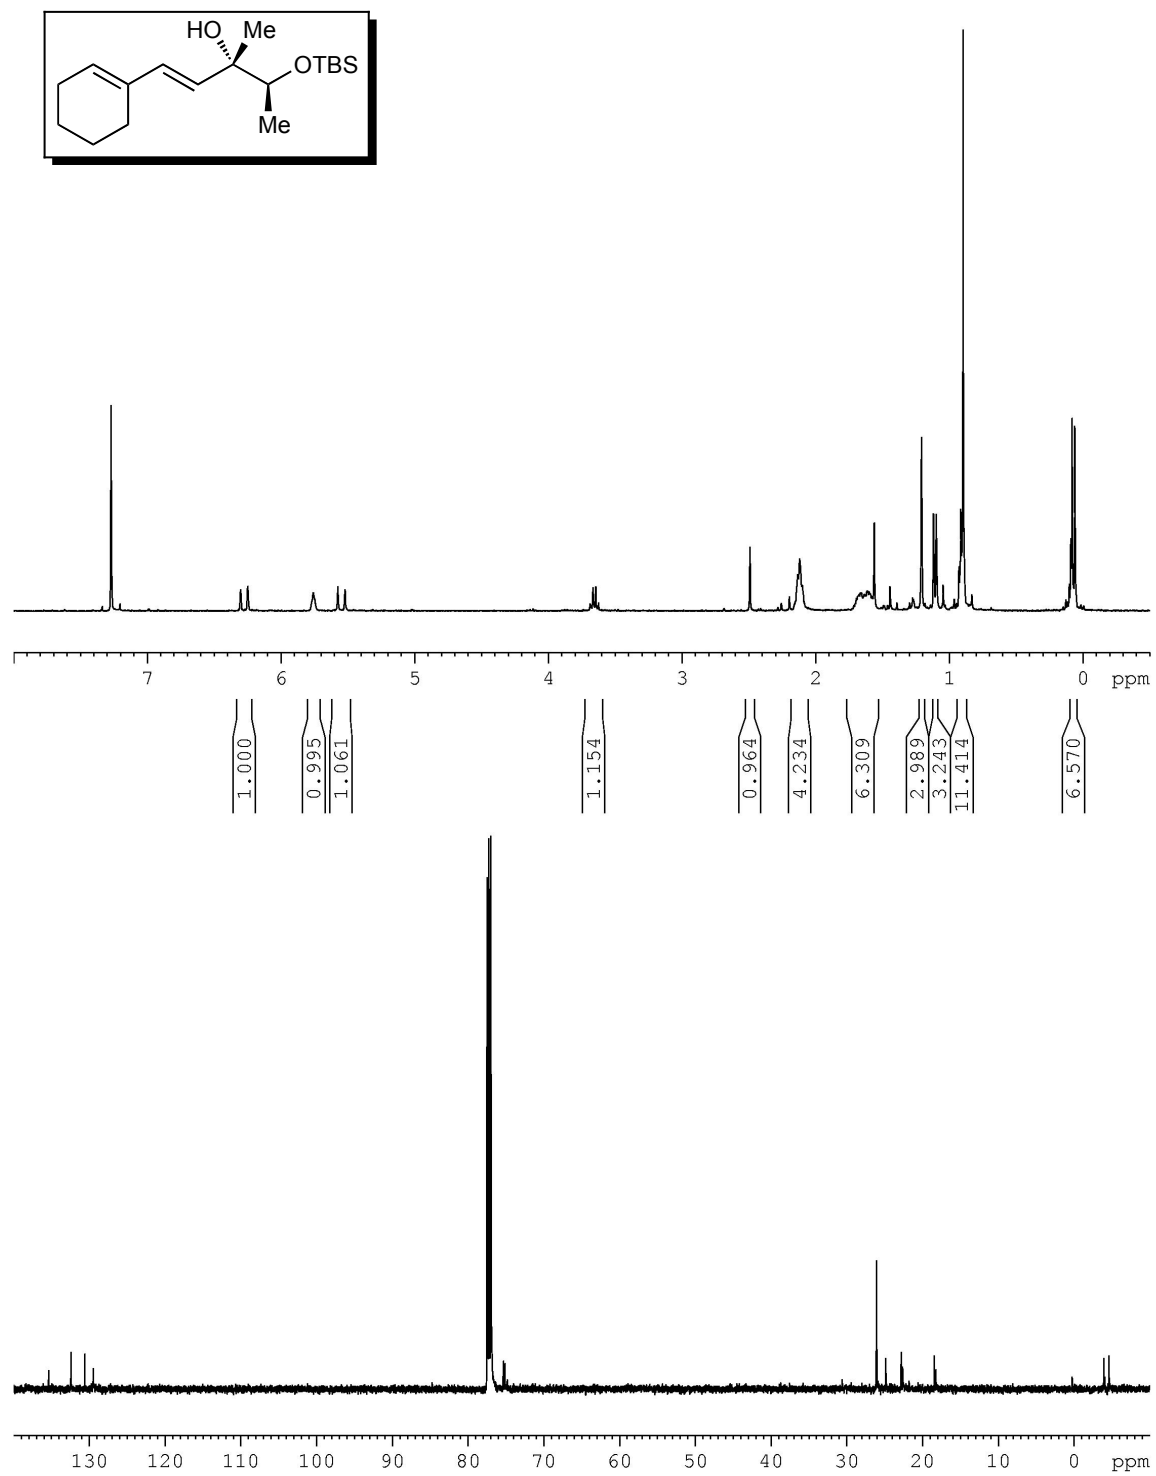

Figure SI-26. 300 MHz  $^1\text{H}$  and 125 MHz  $^{13}\text{C}\{^1\text{H}\}$  NMR in  $\text{CDCl}_3$ .

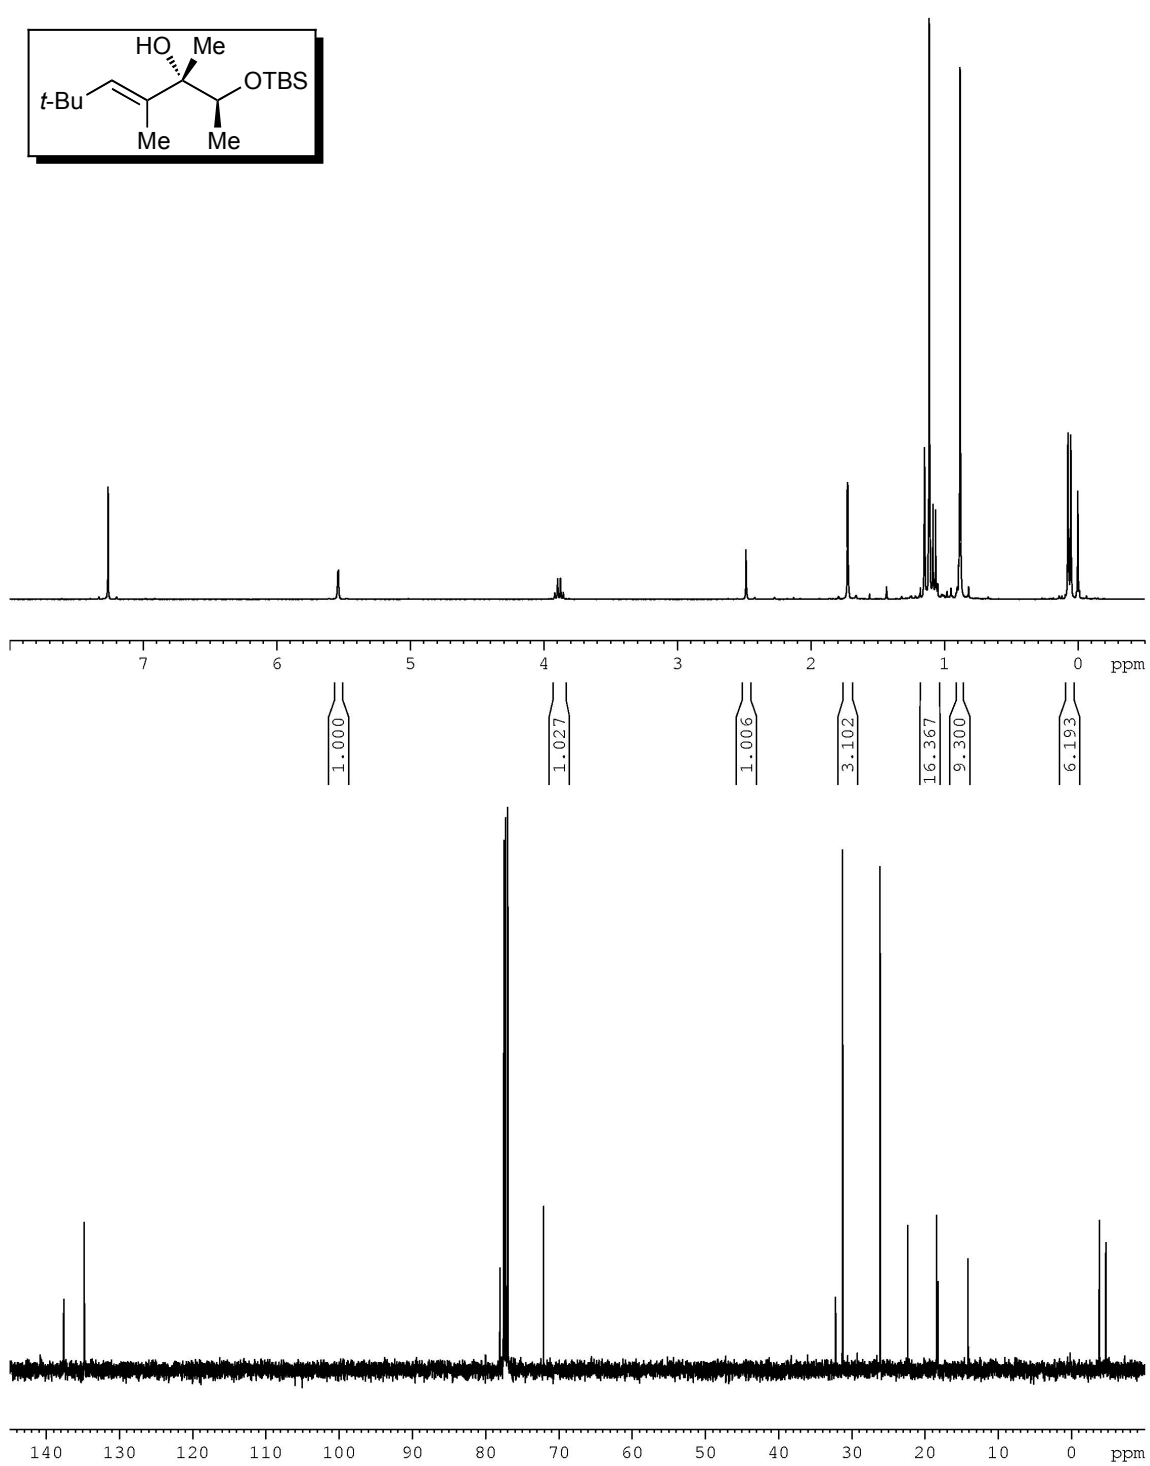

Figure SI-27. 300 MHz  $^1\text{H}$  and 125 MHz  $^{13}\text{C}\{^1\text{H}\}$  NMR in  $\text{CDCl}_3$ .

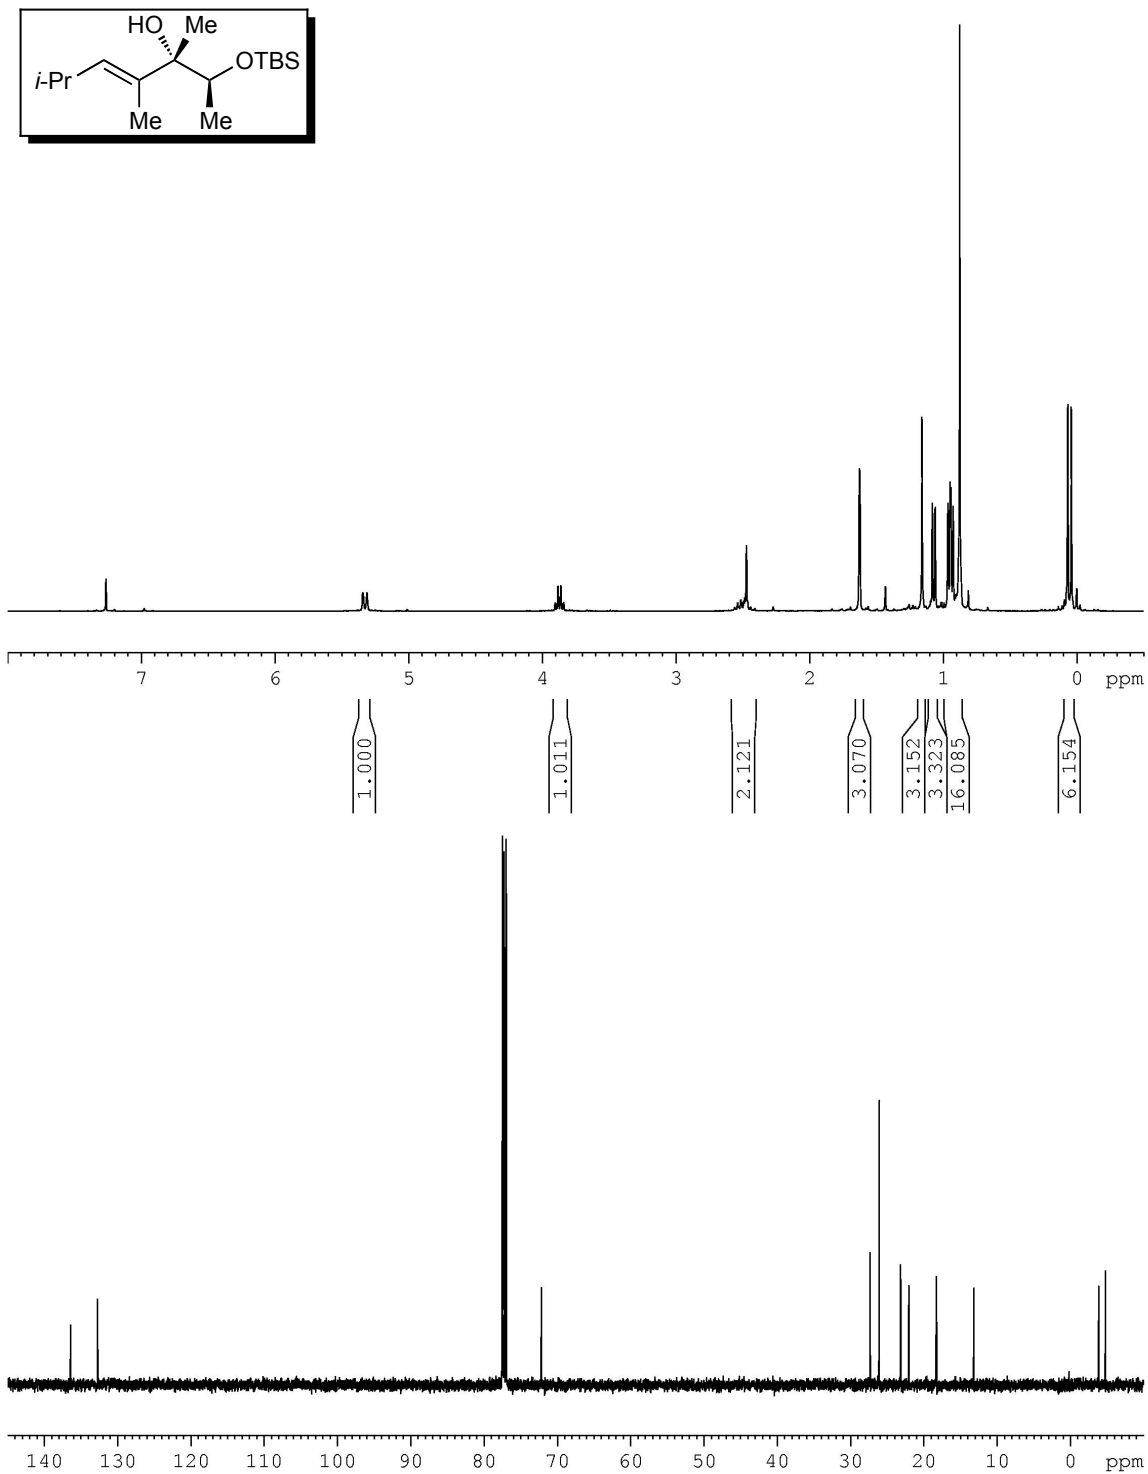

Figure SI-28. 300 MHz  $^1\text{H}$  and 125 MHz  $^{13}\text{C}\{^1\text{H}\}$  NMR in  $\text{CDCl}_3$ .



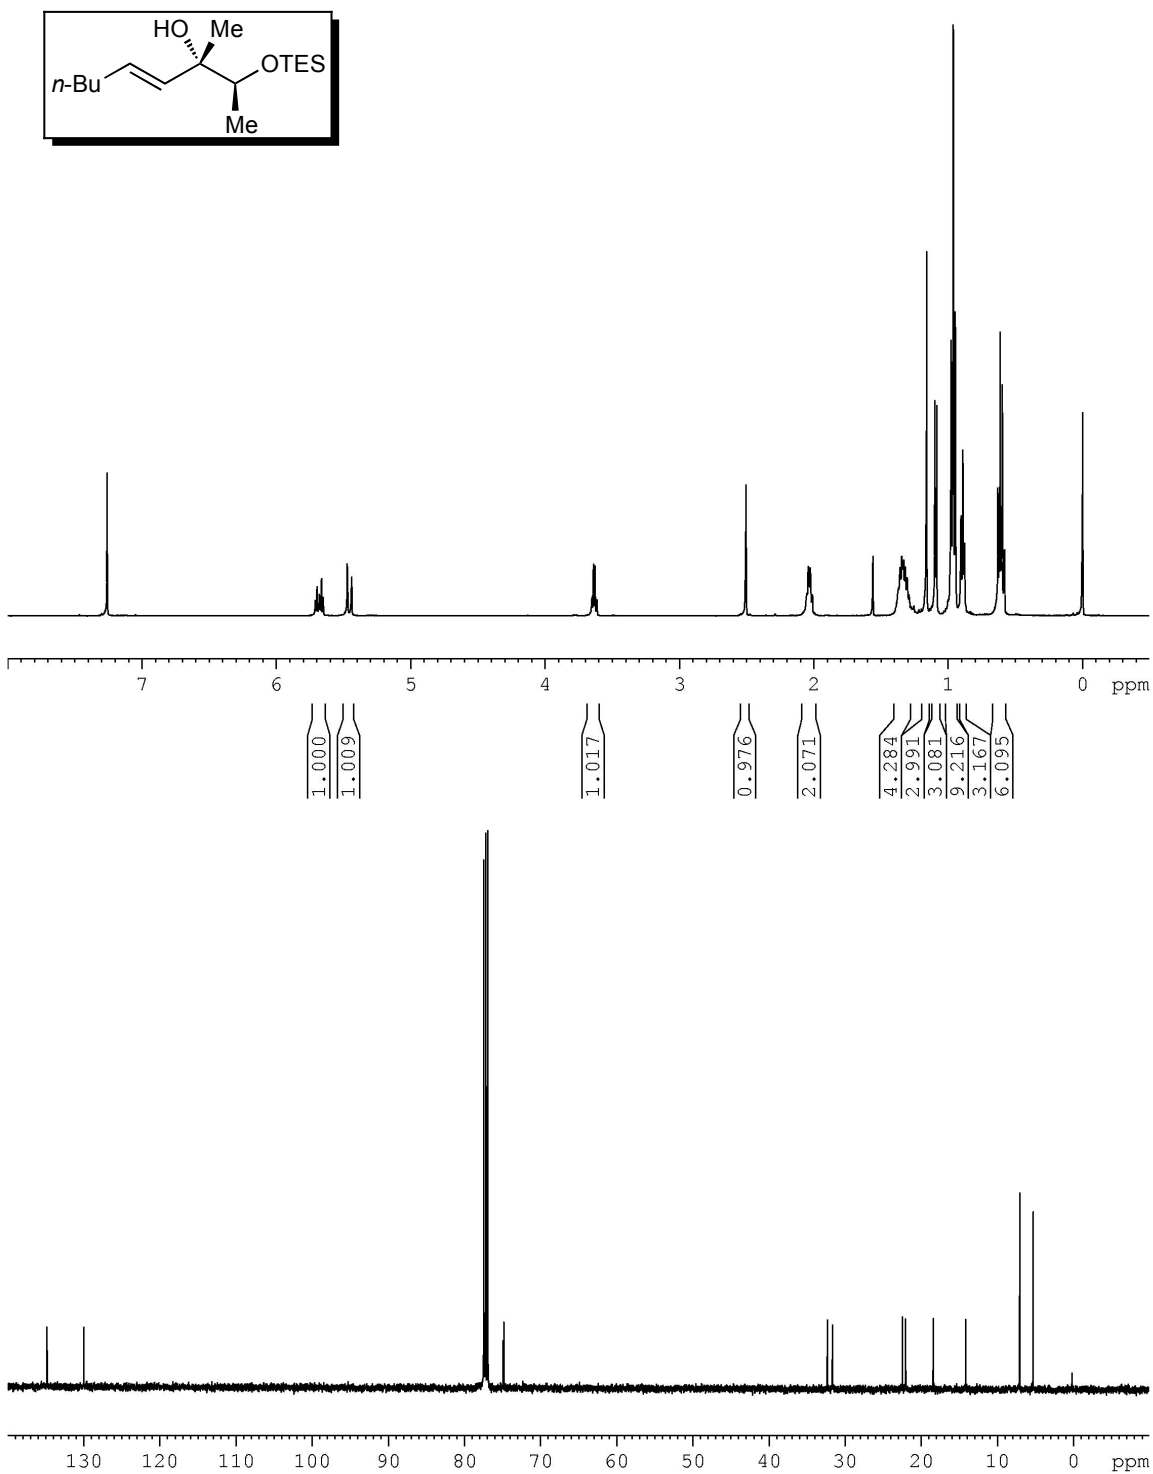

Figure SI-29. 500 MHz  $^1\text{H}$  and 125 MHz  $^{13}\text{C}\{^1\text{H}\}$  NMR in  $\text{CDCl}_3$ .

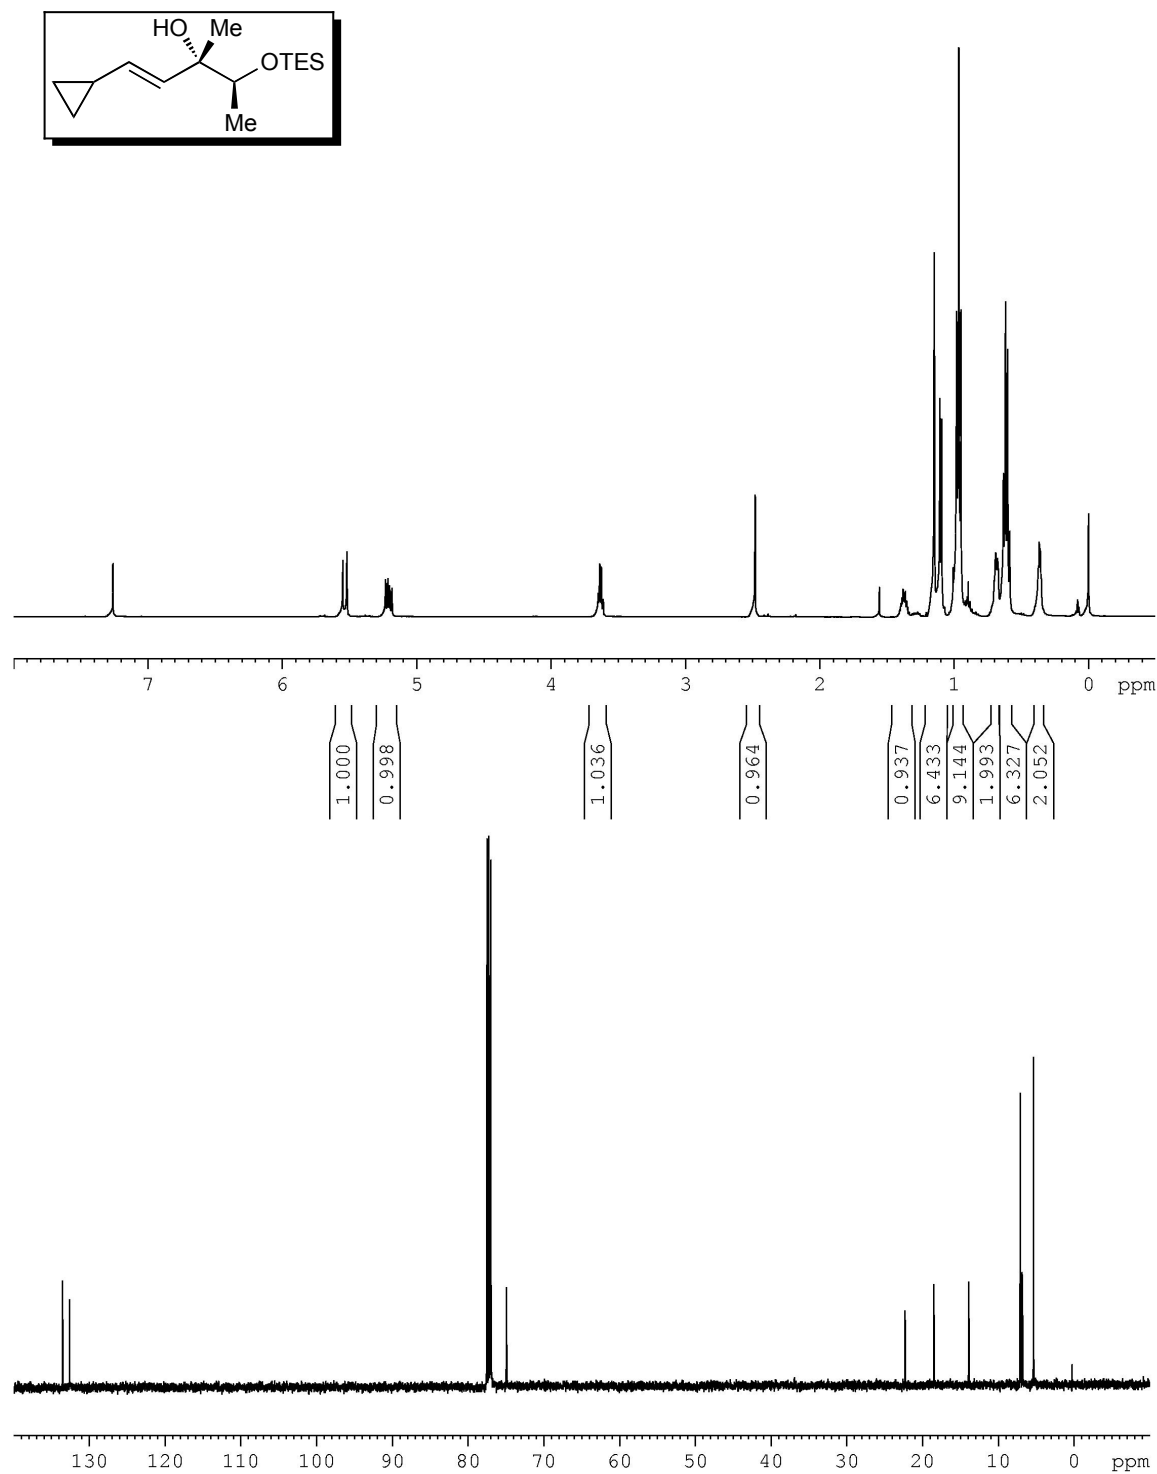

**Figure SI-30.** 500 MHz  $^1\text{H}$  and 125 MHz  $^{13}\text{C}\{^1\text{H}\}$  NMR in  $\text{CDCl}_3$ .

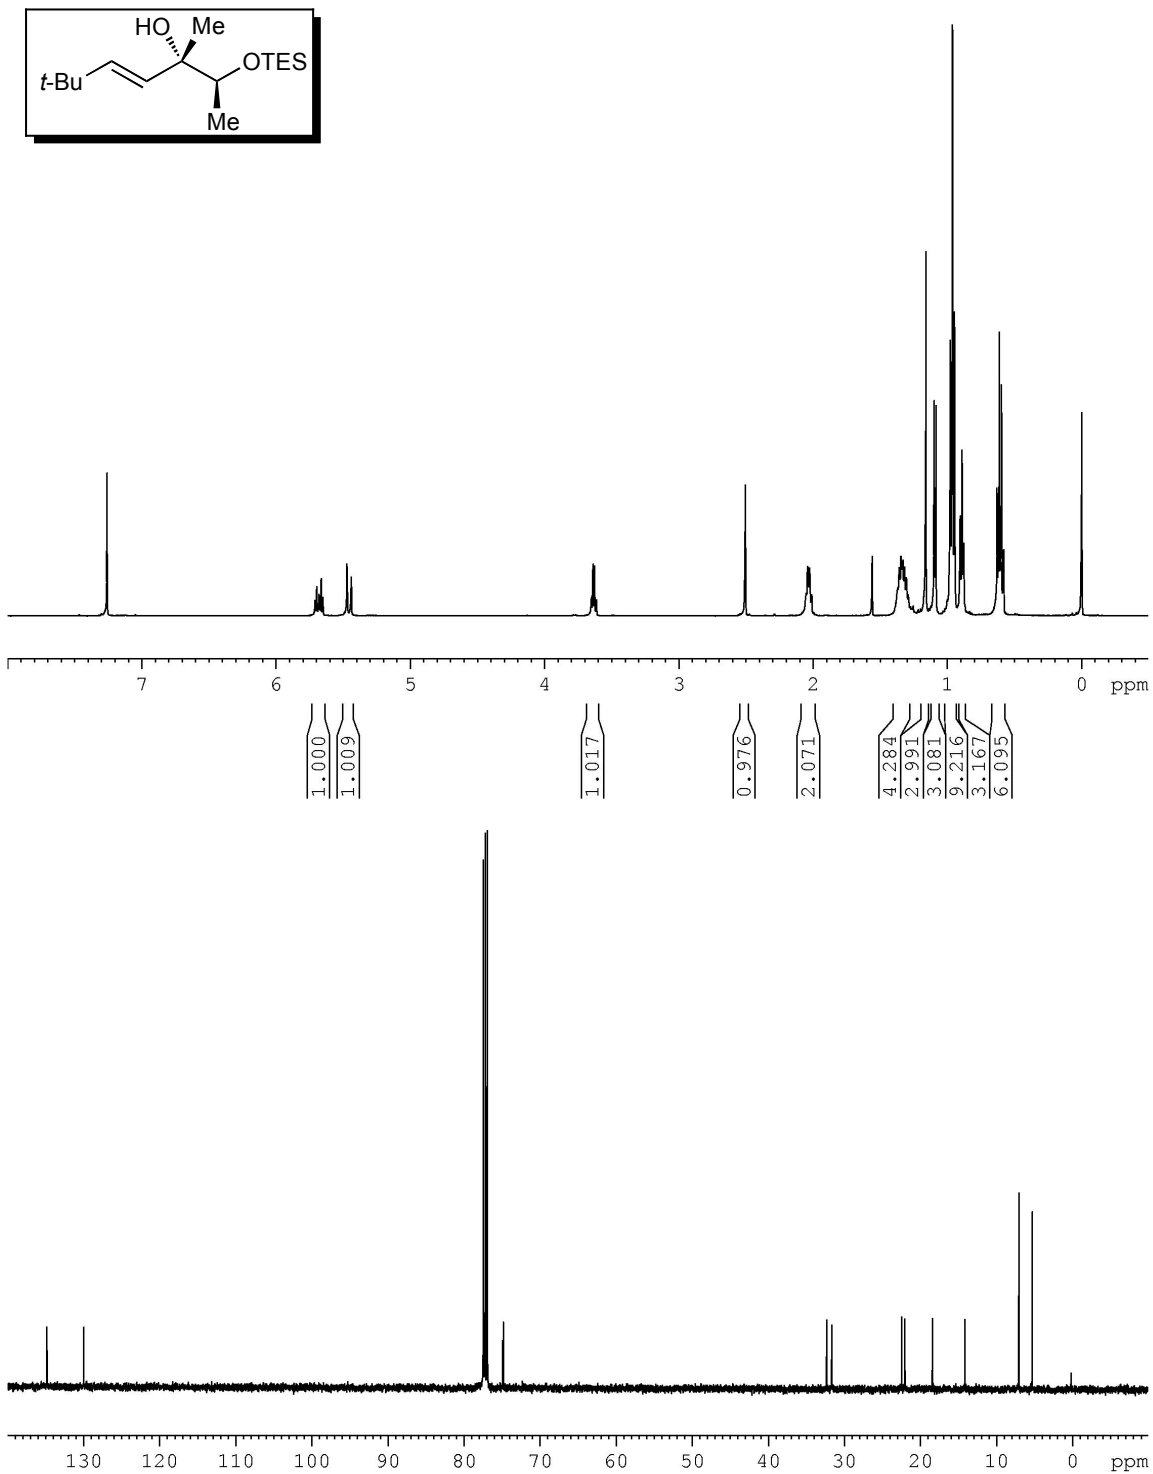

**Figure SI-31.** 500 MHz  $^1\text{H}$  and 125 MHz  $^{13}\text{C}\{^1\text{H}\}$  NMR in  $\text{CDCl}_3$ .

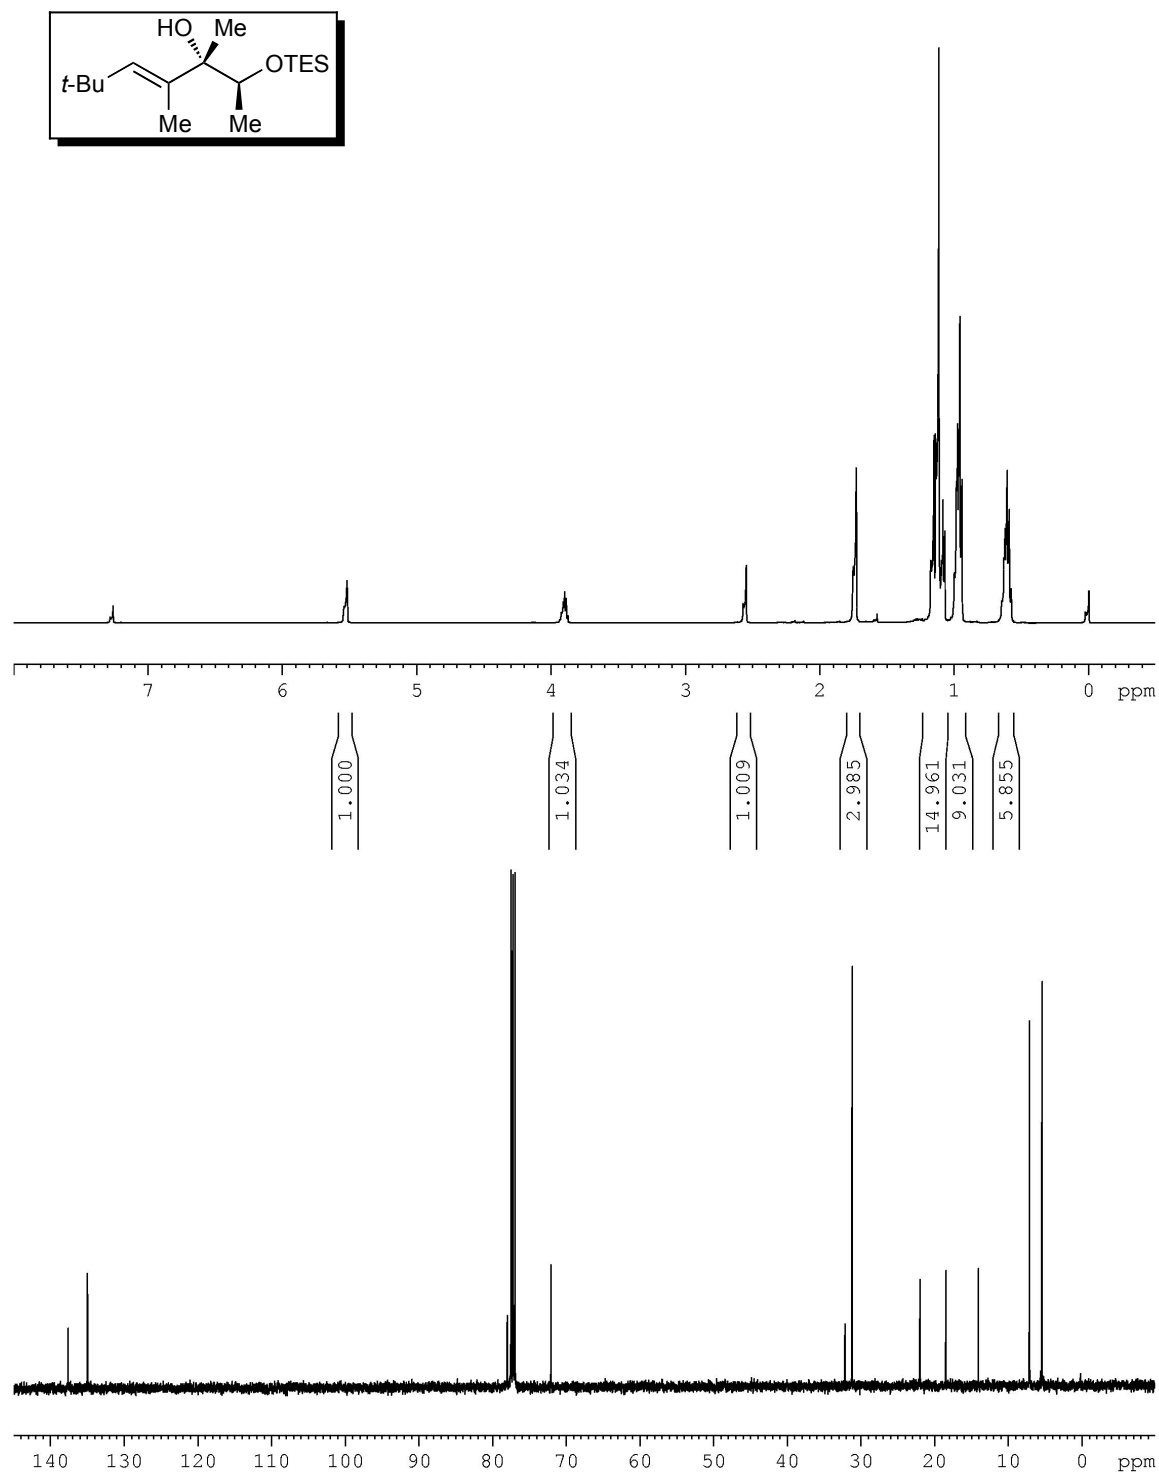

Figure SI-32. 500 MHz  $^1\text{H}$  and 125 MHz  $^{13}\text{C}\{^1\text{H}\}$  NMR in  $\text{CDCl}_3$ .

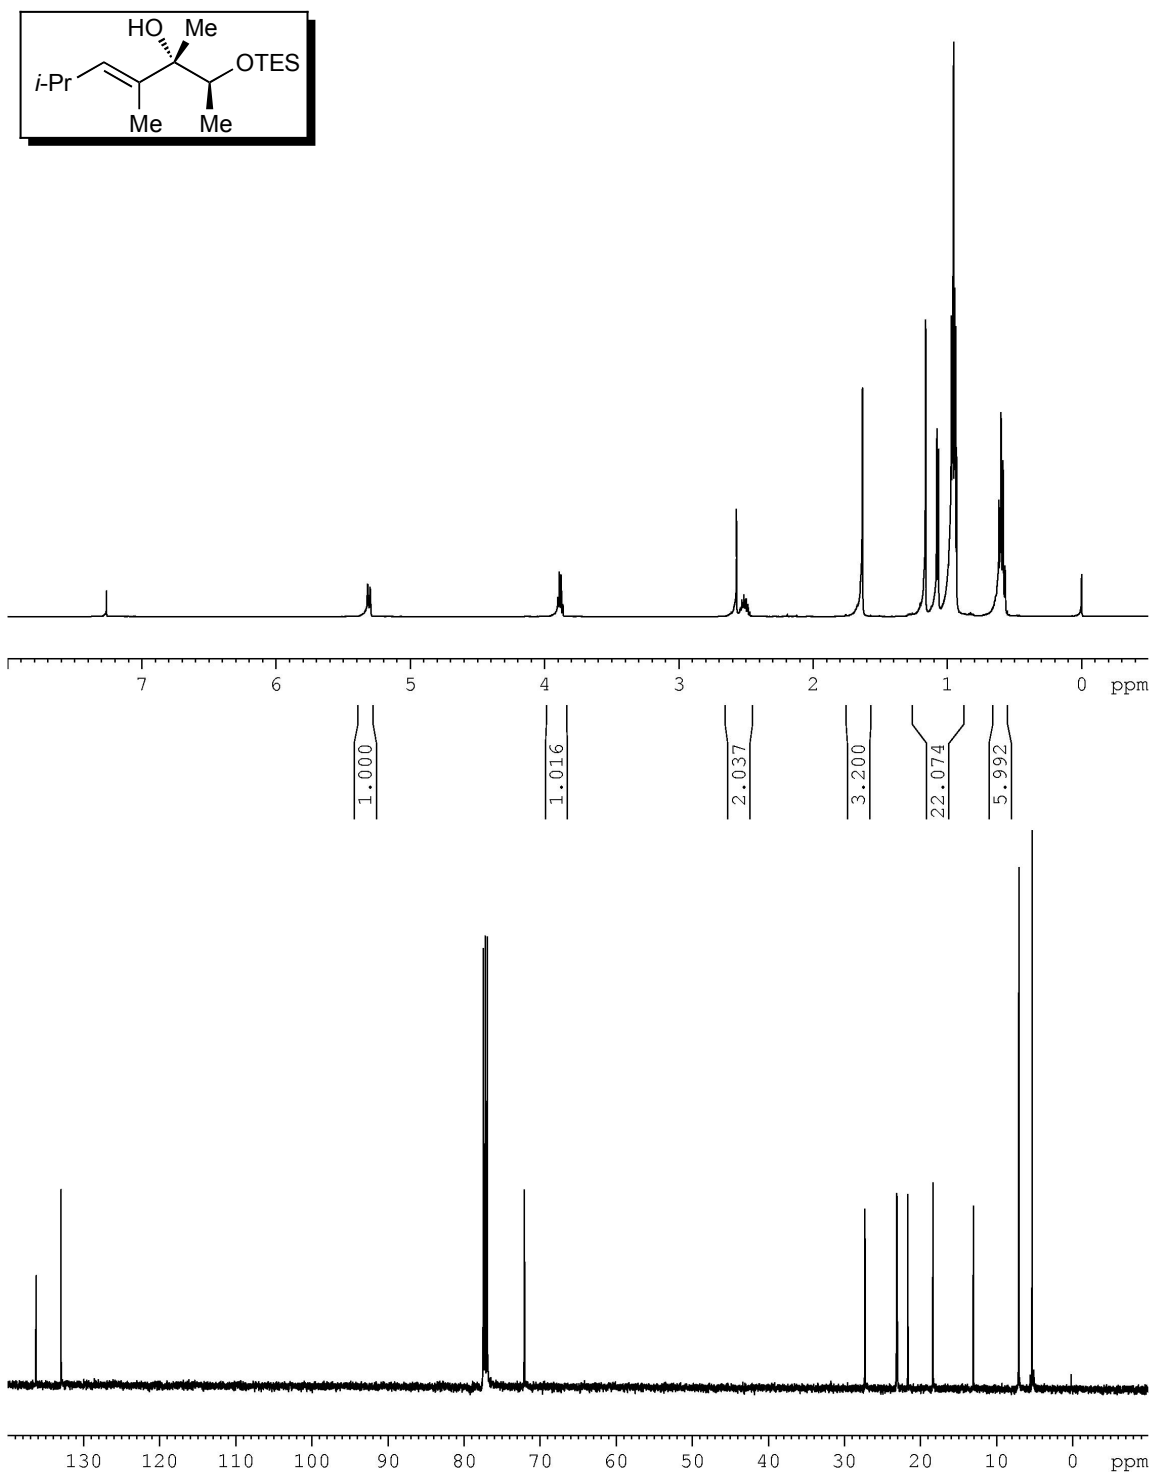

Figure SI-33. 500 MHz  $^1\text{H}$  and 125 MHz  $^{13}\text{C}\{^1\text{H}\}$  NMR in  $\text{CDCl}_3$ .

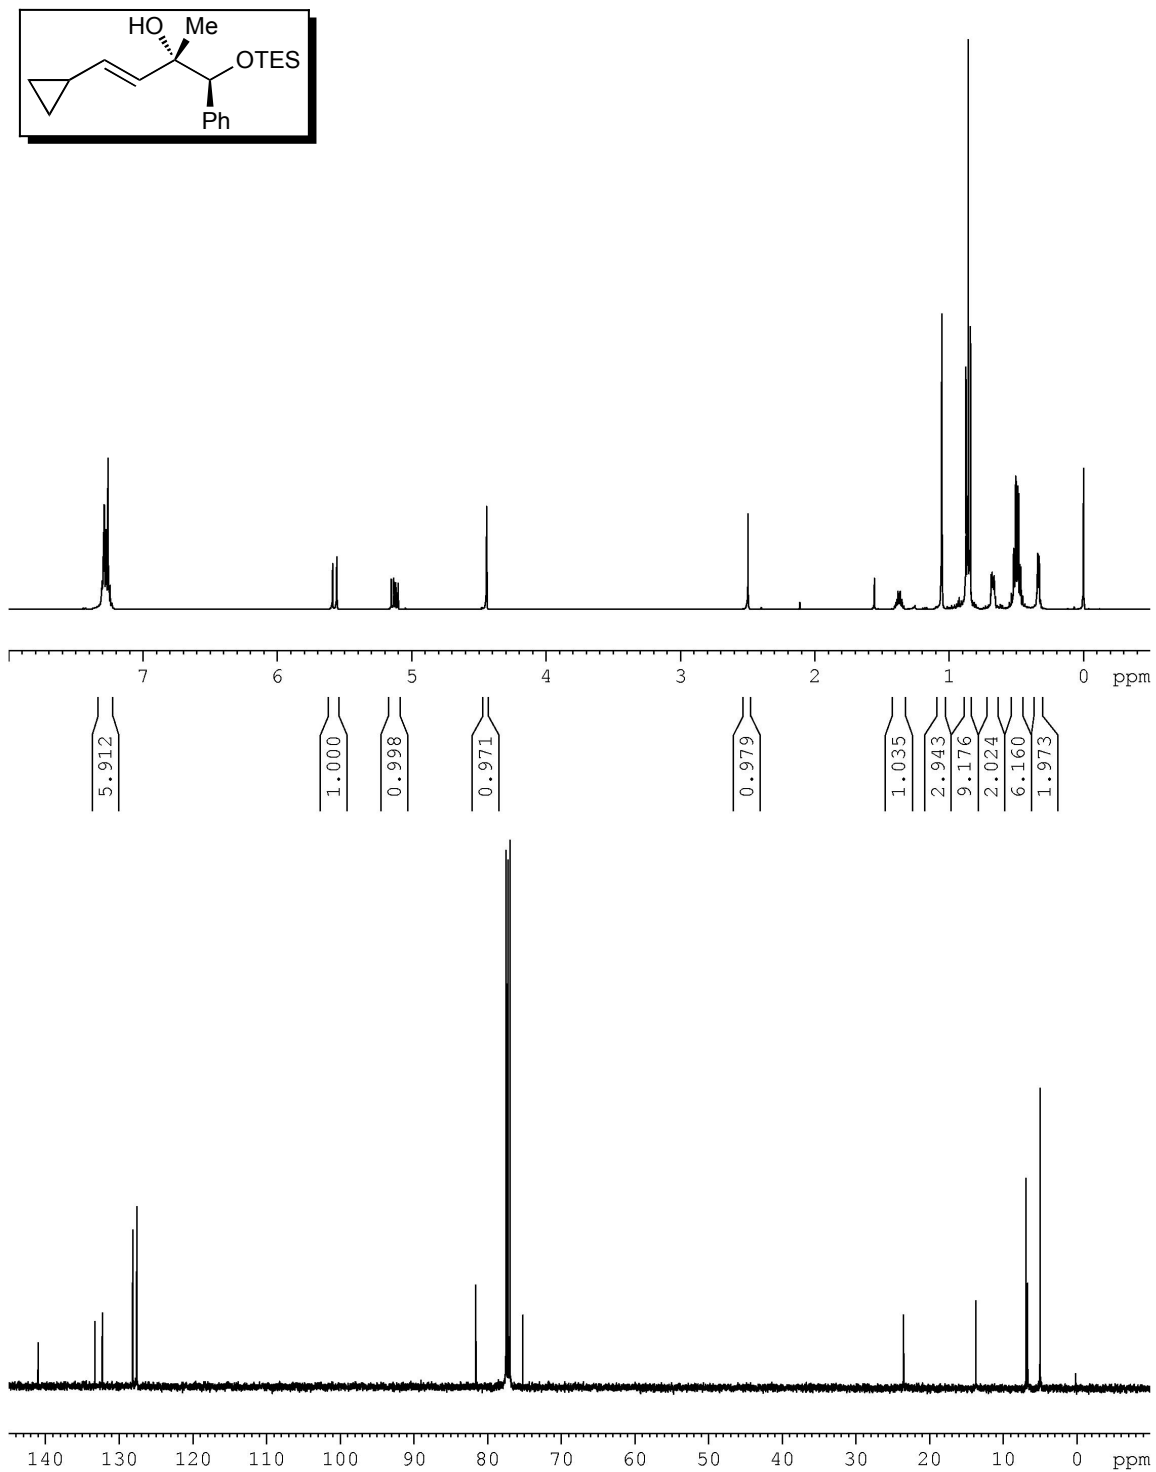

Figure SI-34. 500 MHz <sup>1</sup>H and 125 MHz <sup>13</sup>C{<sup>1</sup>H} NMR in CDCl<sub>3</sub>.

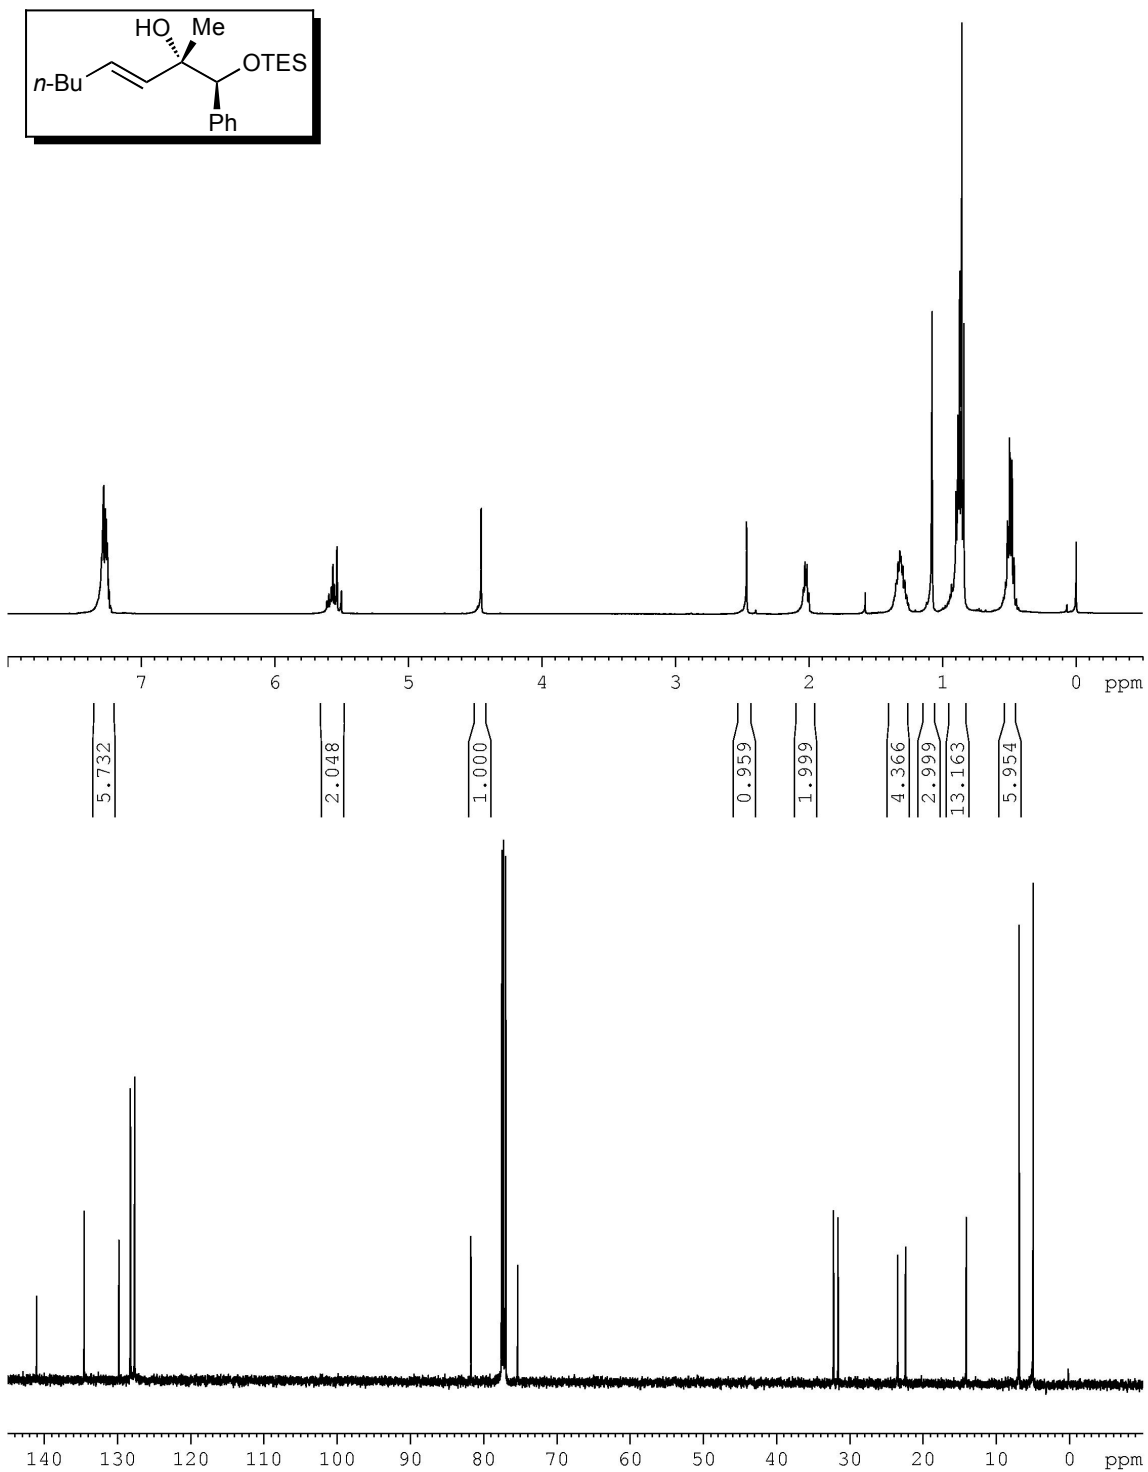

Figure SI-35. 500 MHz  $^1\text{H}$  and 125 MHz  $^{13}\text{C}\{^1\text{H}\}$  NMR in  $\text{CDCl}_3$ .

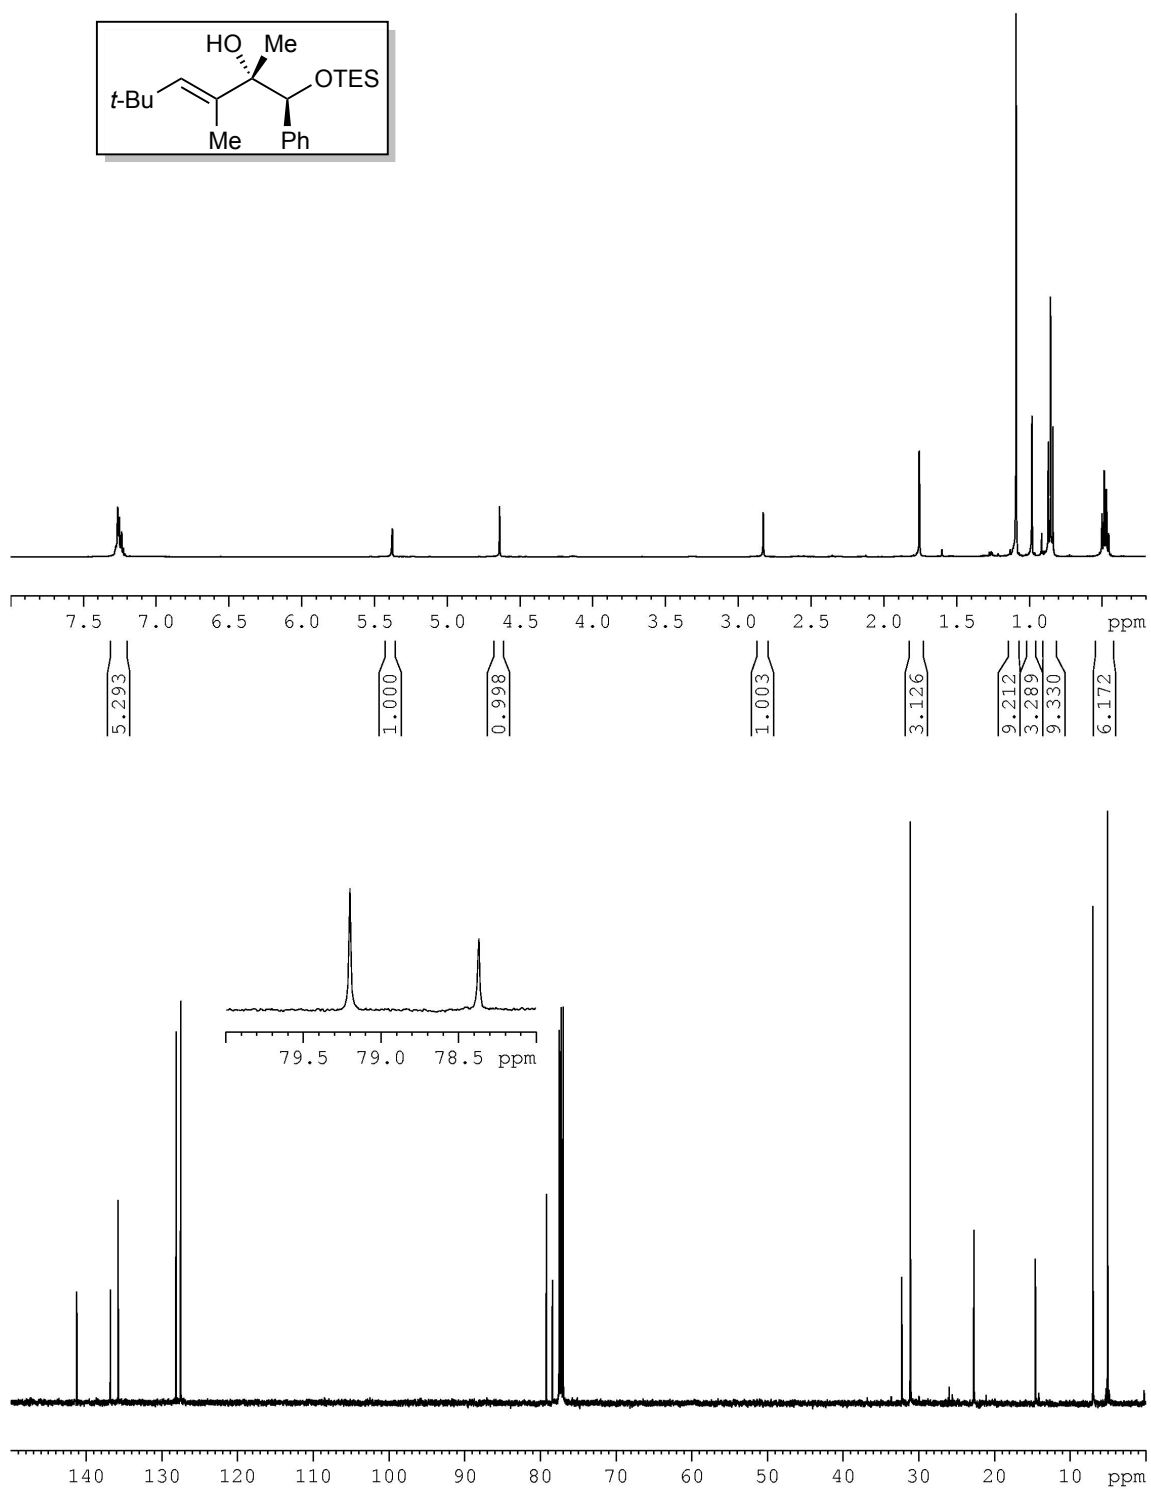

Figure SI-36. 500 MHz <sup>1</sup>H and 125 MHz <sup>13</sup>C{<sup>1</sup>H} NMR in CDCl<sub>3</sub>.



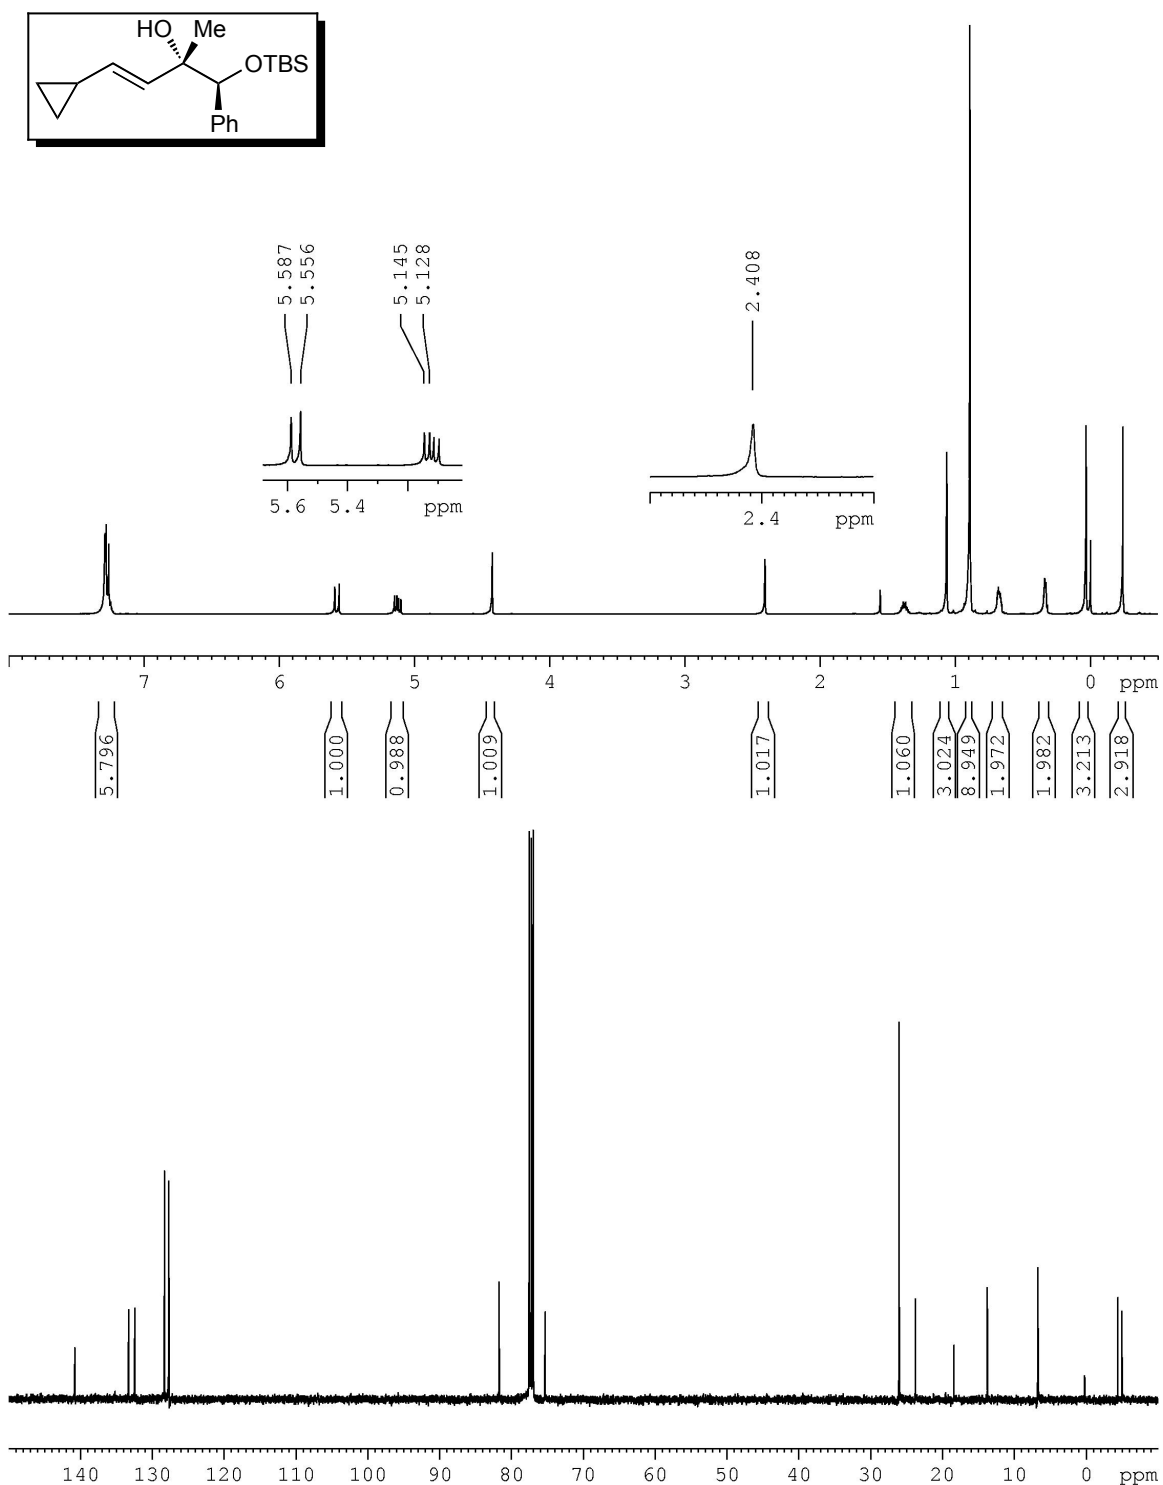

Figure SI-37. 500 MHz  $^1\text{H}$  and 125 MHz  $^{13}\text{C}\{^1\text{H}\}$  NMR in  $\text{CDCl}_3$ .

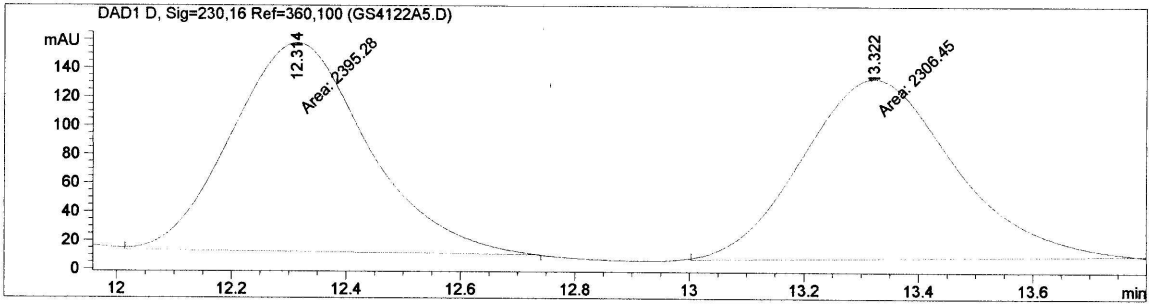

=====  
Area Percent Report  
=====

Sorted By : Signal  
Multiplier : 1.0000  
Dilution : 1.0000  
Use Multiplier & Dilution Factor with ISTDs

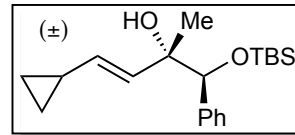

Signal 1: DAD1 D, Sig=230,16 Ref=360,100

| Peak # | RetTime [min] | Type | Width [min] | Area [mAU*s] | Height [mAU] | Area %  |
|--------|---------------|------|-------------|--------------|--------------|---------|
| 1      | 12.314        | MM   | 0.2742      | 2395.28027   | 145.61722    | 50.9446 |
| 2      | 13.322        | MM   | 0.3071      | 2306.45288   | 125.16226    | 49.0554 |

Totals : 4701.73315 270.77948

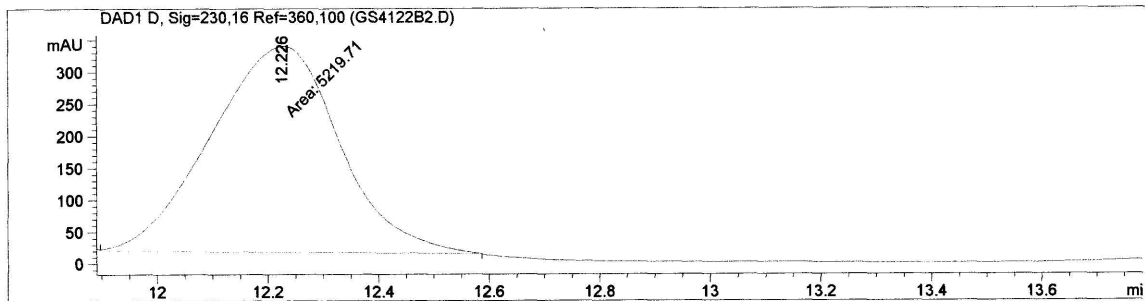

=====  
Area Percent Report  
=====

Sorted By : Signal  
Multiplier : 1.0000  
Dilution : 1.0000  
Use Multiplier & Dilution Factor with ISTDs

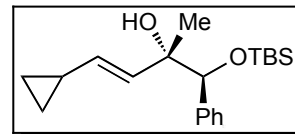

Signal 1: DAD1 D, Sig=230,16 Ref=360,100

| Peak # | RetTime [min] | Type | Width [min] | Area [mAU*s] | Height [mAU] | Area %   |
|--------|---------------|------|-------------|--------------|--------------|----------|
| 1      | 12.226        | MM   | 0.2696      | 5219.71094   | 322.73309    | 100.0000 |

Totals : 5219.71094 322.73309

Figure SI 38. HPLC analysis of chiral purity of vinyl addition product

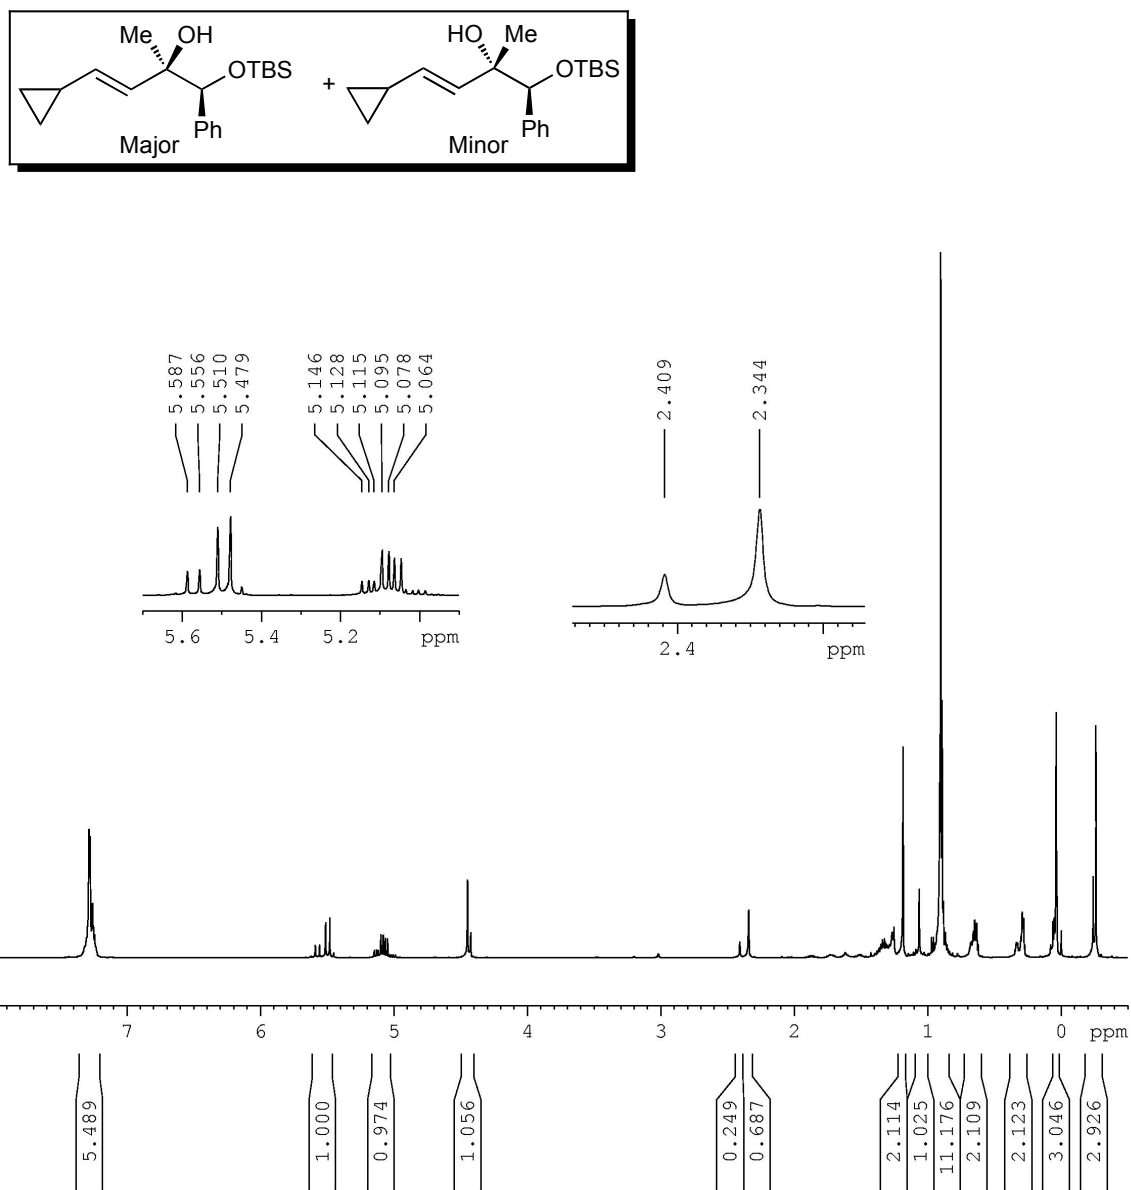

Figure SI-39. 500 MHz  $^1\text{H}$  NMR in  $\text{CDCl}_3$  (from vinyl lithium addition).

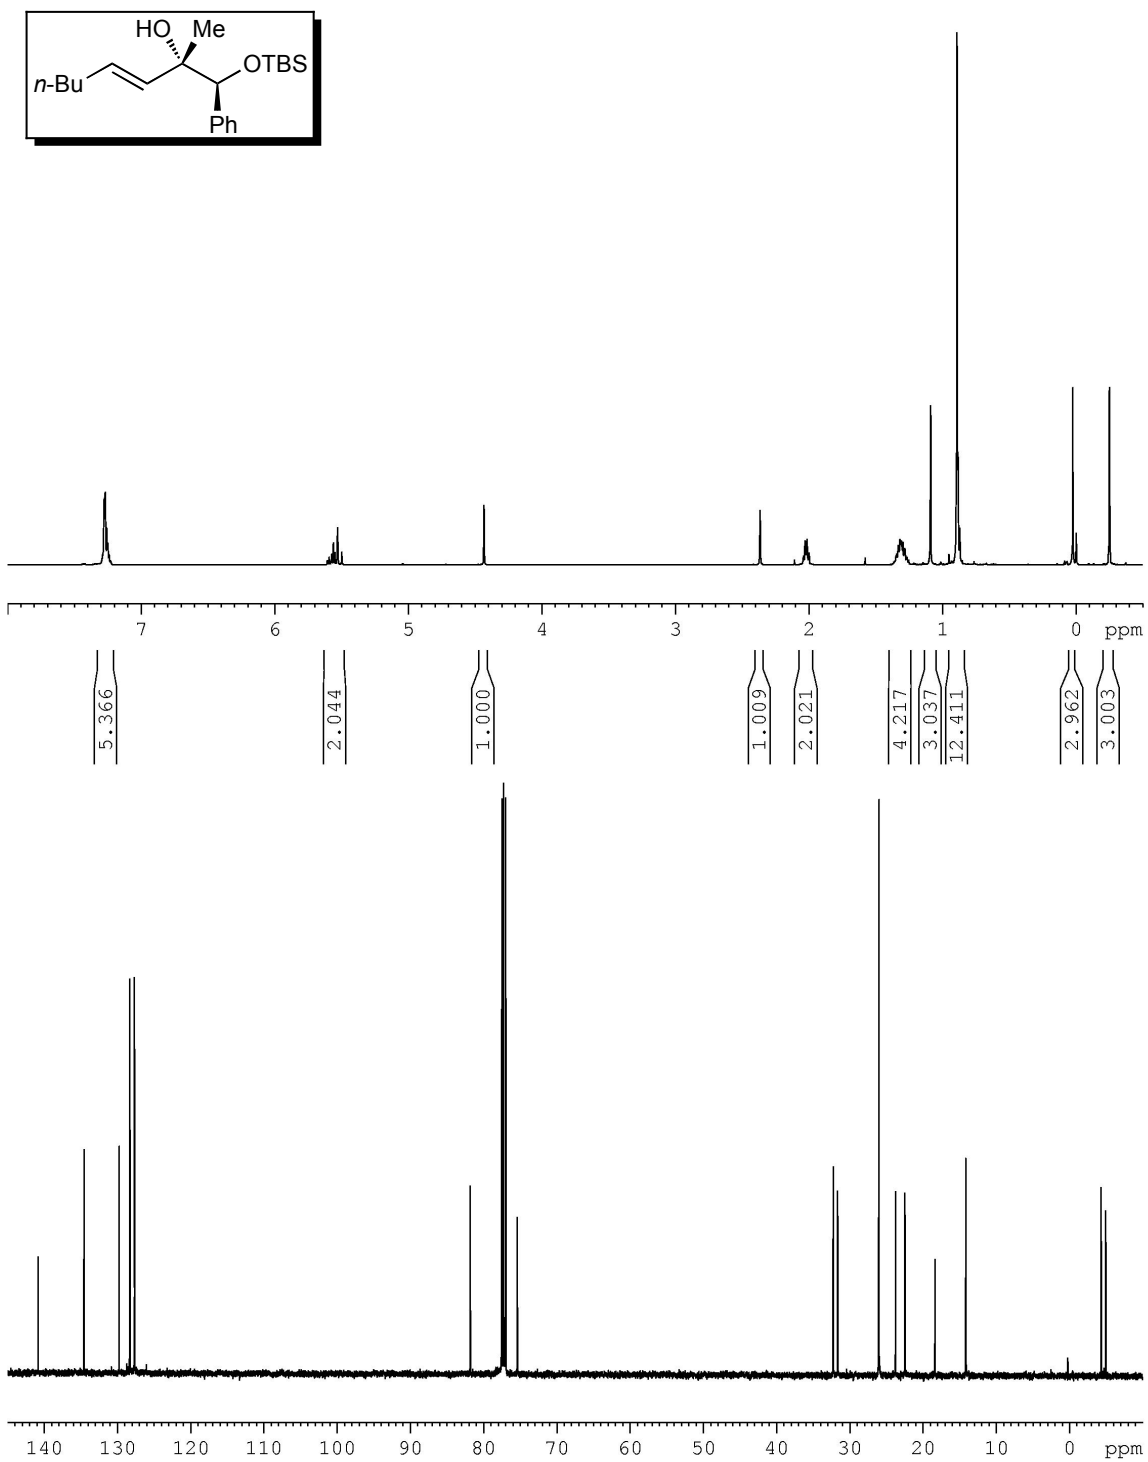

Figure SI-40. 500 MHz  $^1\text{H}$  and 125 MHz  $^{13}\text{C}\{^1\text{H}\}$  NMR in  $\text{CDCl}_3$ .

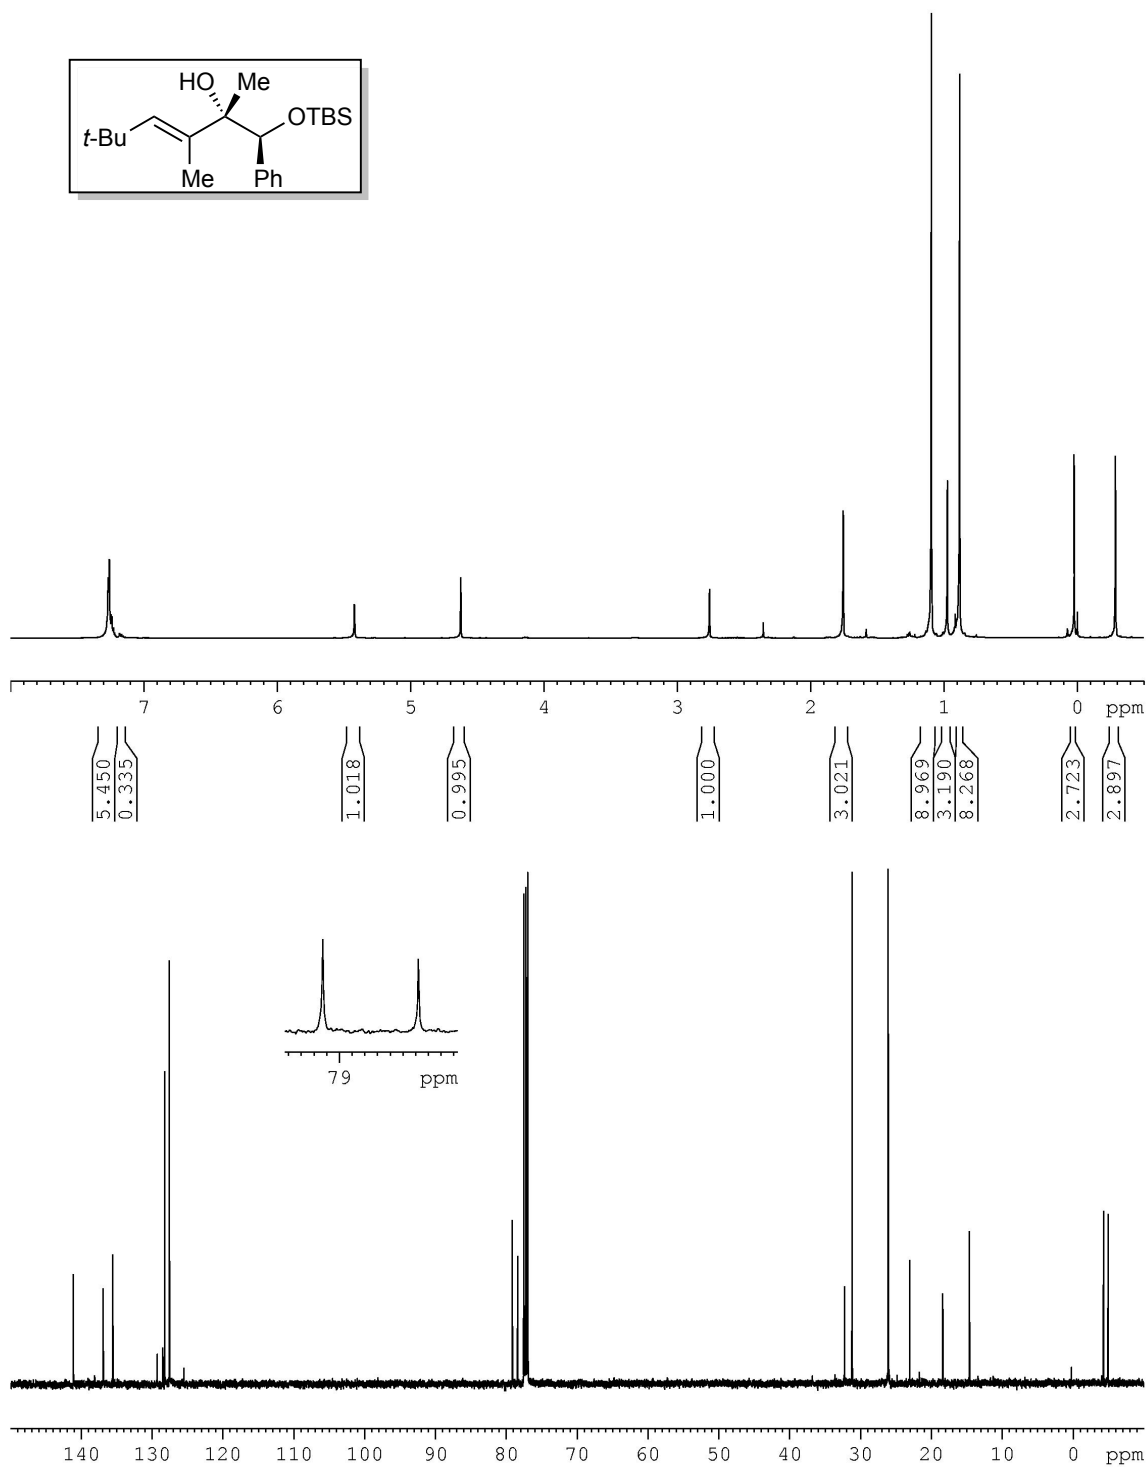

**Figure SI-41.** 500 MHz  $^1\text{H}$  and 125 MHz  $^{13}\text{C}\{^1\text{H}\}$  NMR in  $\text{CDCl}_3$  (small amount residual toluene).

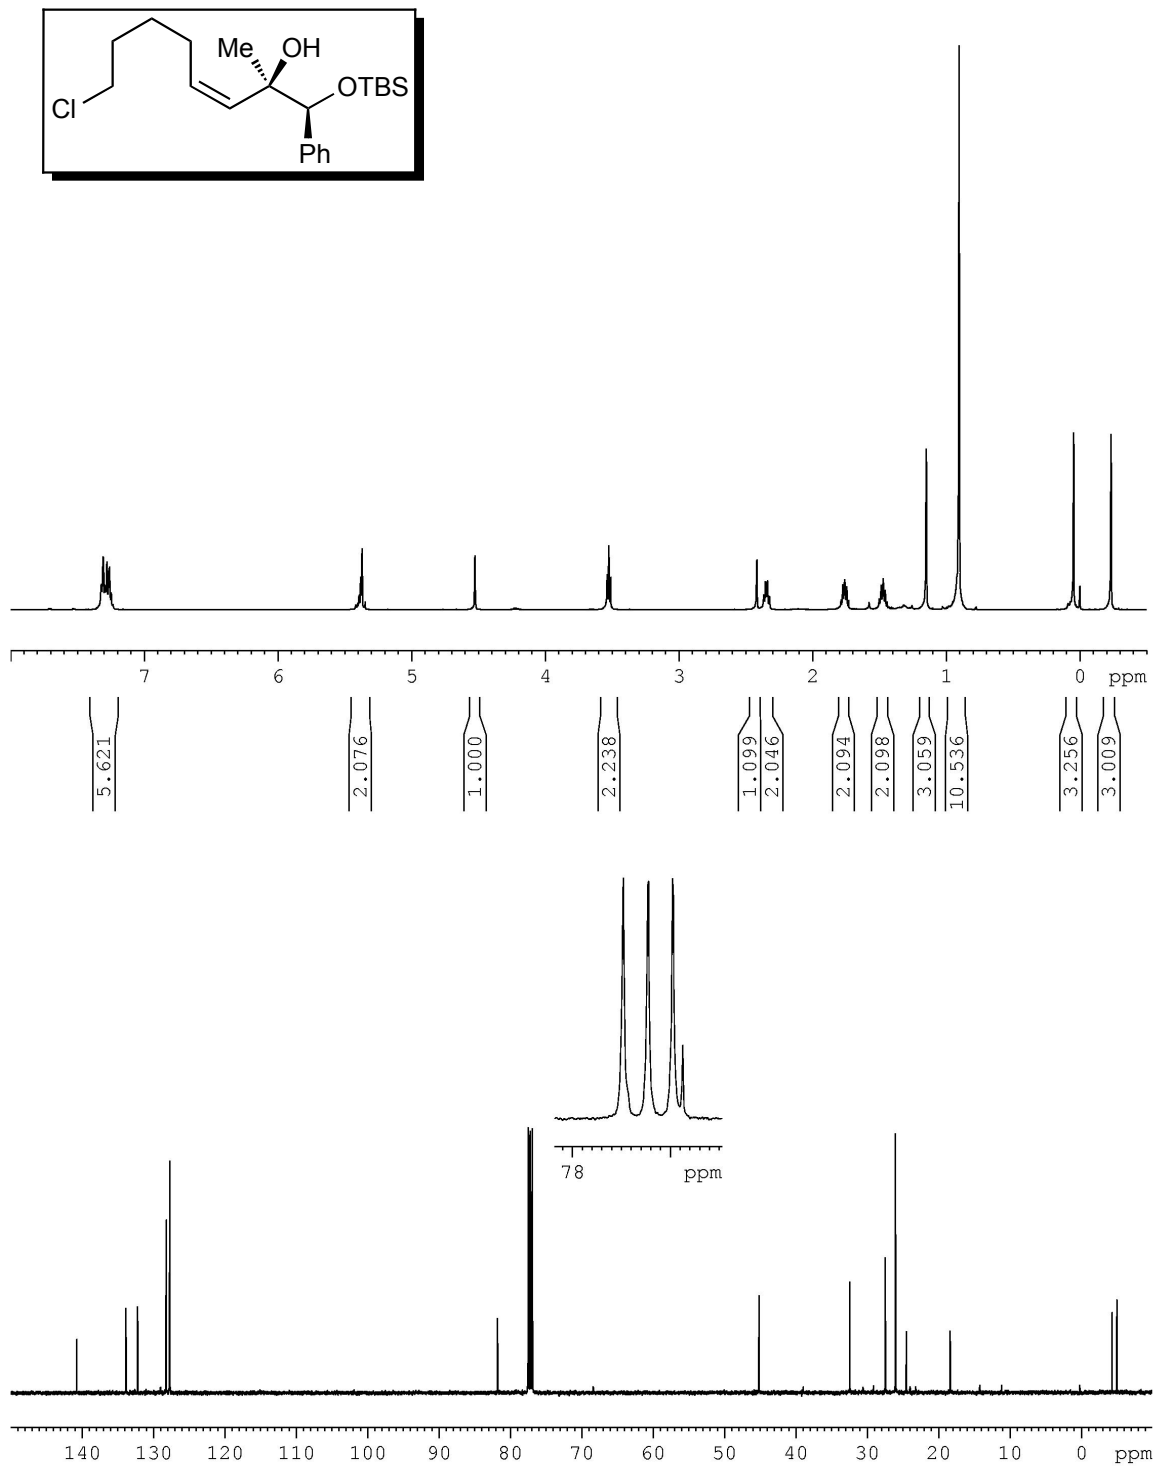

Figure SI-42. 500 MHz <sup>1</sup>H and 125 MHz <sup>13</sup>C{<sup>1</sup>H} NMR in CDCl<sub>3</sub>.

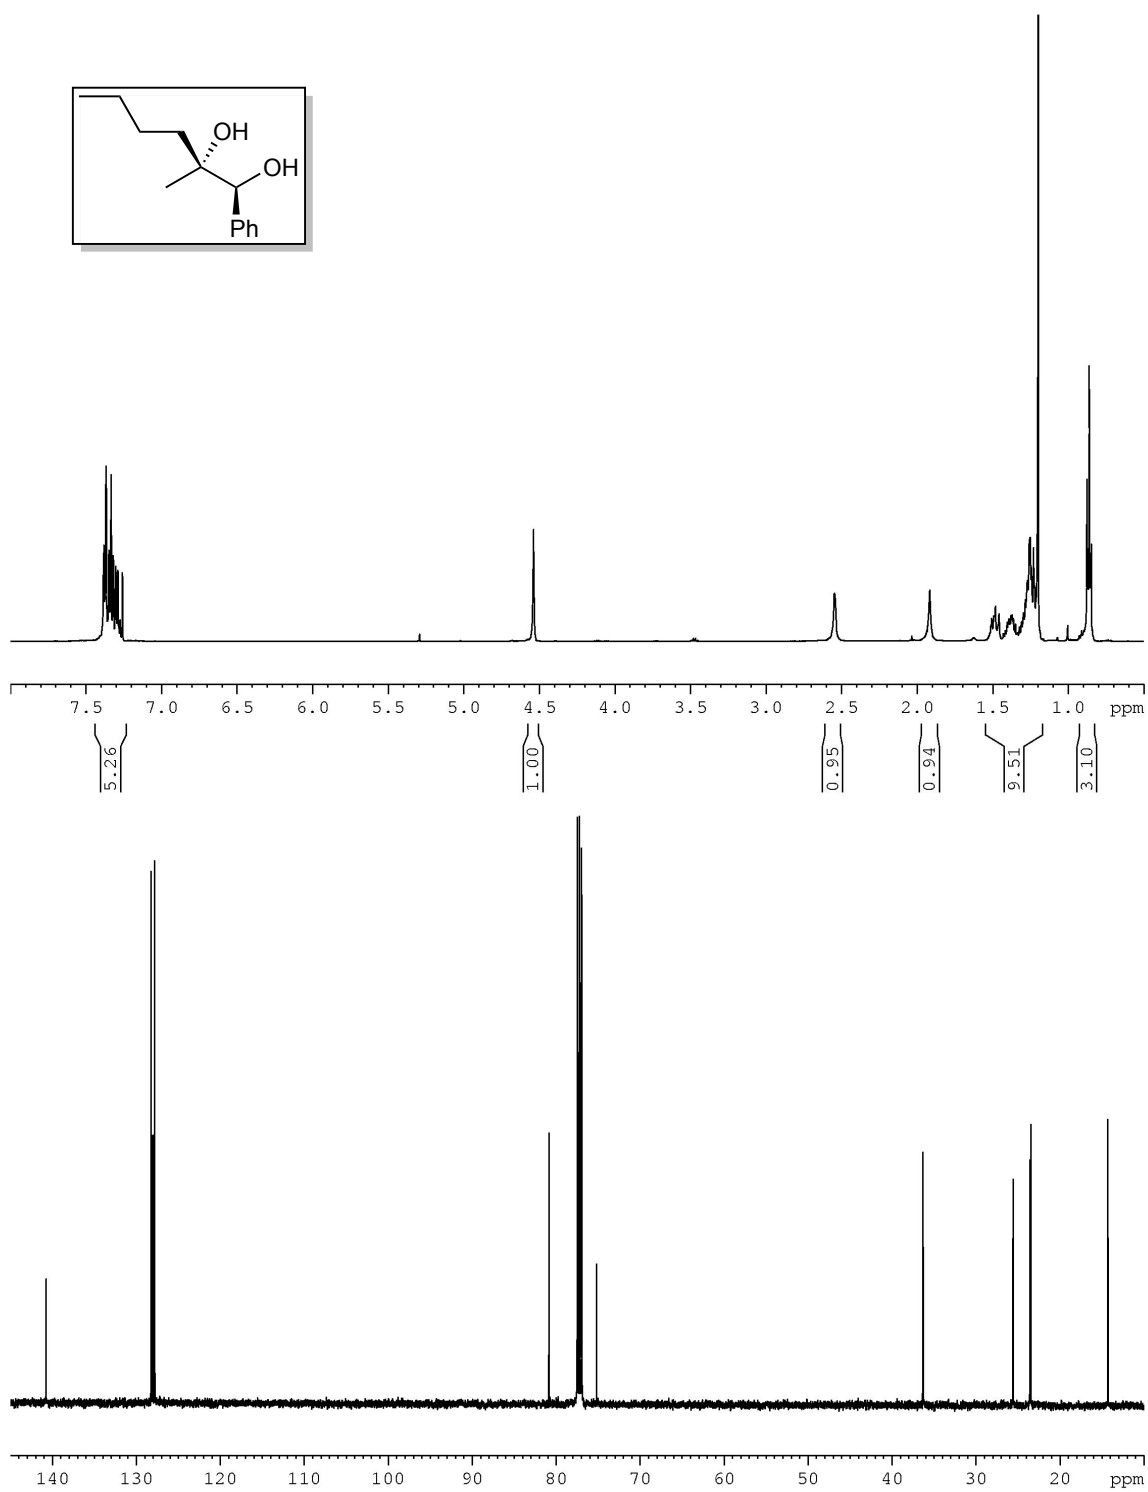

**Figure SI-43.** 500 MHz  $^1\text{H}$  and 125 MHz  $^{13}\text{C}\{^1\text{H}\}$  NMR in  $\text{CDCl}_3$ .

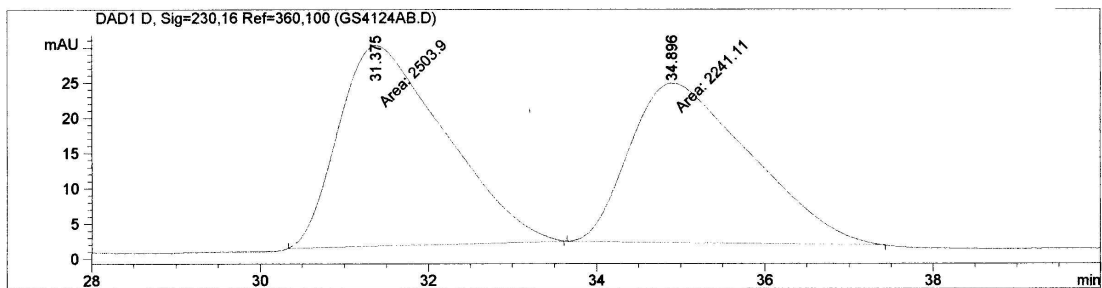

=====  
 Area Percent Report  
 =====

Sorted By : Signal  
 Multiplier : 1.0000  
 Dilution : 1.0000  
 Use Multiplier & Dilution Factor with ISTDs

Signal 1: DAD1 D, Sig=230,16 Ref=360,100

| Peak # | RetTime [min] | Type | Width [min] | Area [mAU*s] | Height [mAU] | Area %  |
|--------|---------------|------|-------------|--------------|--------------|---------|
| 1      | 6.269         | PB   | 0.2672      | 45.73721     | 2.60085      | 0.9547  |
| 2      | 31.375        | MM   | 1.4679      | 2503.90405   | 28.42905     | 52.2654 |
| 3      | 34.896        | MM   | 1.6564      | 2241.10645   | 22.55004     | 46.7799 |

Totals : 4790.74771 53.57994

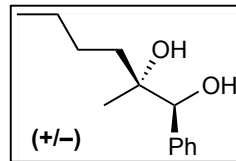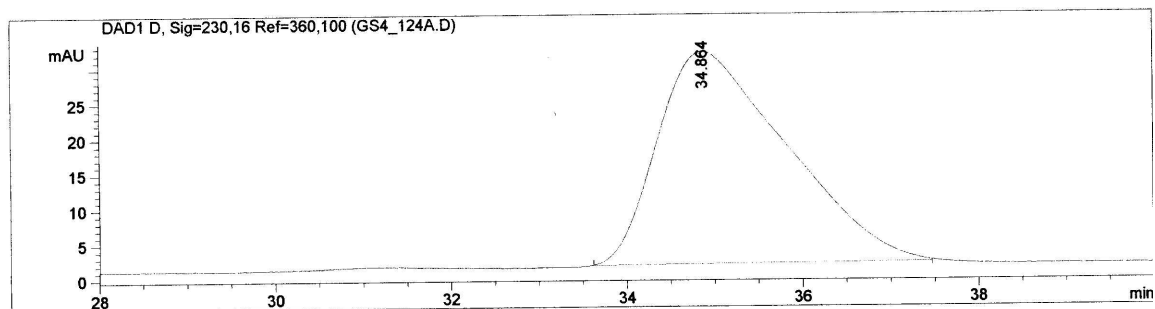

=====  
 Area Percent Report  
 =====

Sorted By : Signal  
 Multiplier : 1.0000  
 Dilution : 1.0000  
 Use Multiplier & Dilution Factor with ISTDs

Signal 1: DAD1 D, Sig=230,16 Ref=360,100

| Peak # | RetTime [min] | Type | Width [min] | Area [mAU*s] | Height [mAU] | Area %   |
|--------|---------------|------|-------------|--------------|--------------|----------|
| 1      | 34.864        | BB   | 1.2810      | 3068.48828   | 30.21077     | 100.0000 |

Totals : 3068.48828 30.21077

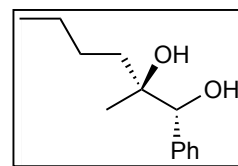

Figure SI-44. HPLC analysis of chiral purity of methyl addition product.



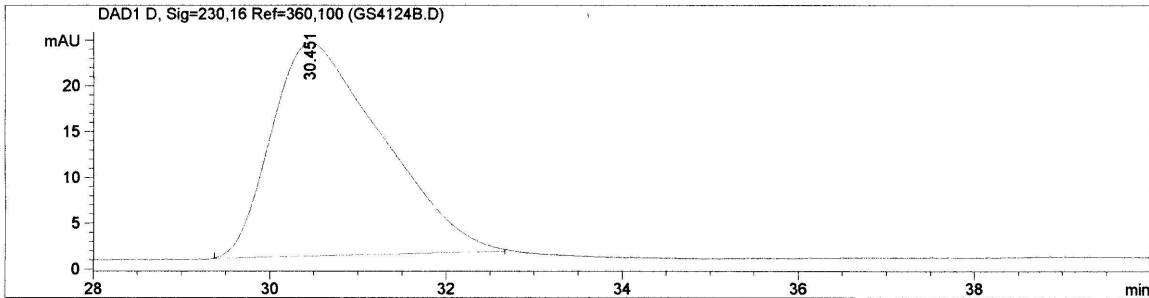

=====  
 Area Percent Report  
 =====

Sorted By : Signal  
 Multiplier : 1.0000  
 Dilution : 1.0000  
 Use Multiplier & Dilution Factor with ISTDs

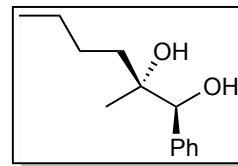

Signal 1: DAD1 D, Sig=230,16 Ref=360,100

| Peak # | RetTime [min] | Type | Width [min] | Area [mAU*s] | Height [mAU] | Area %   |
|--------|---------------|------|-------------|--------------|--------------|----------|
| 1      | 30.451        | BB   | 1.1111      | 2023.77087   | 23.25989     | 100.0000 |

Totals : 2023.77087 23.25989

**Figure SI-45** . HPLC analysis of chiral purity of methyl addition product.

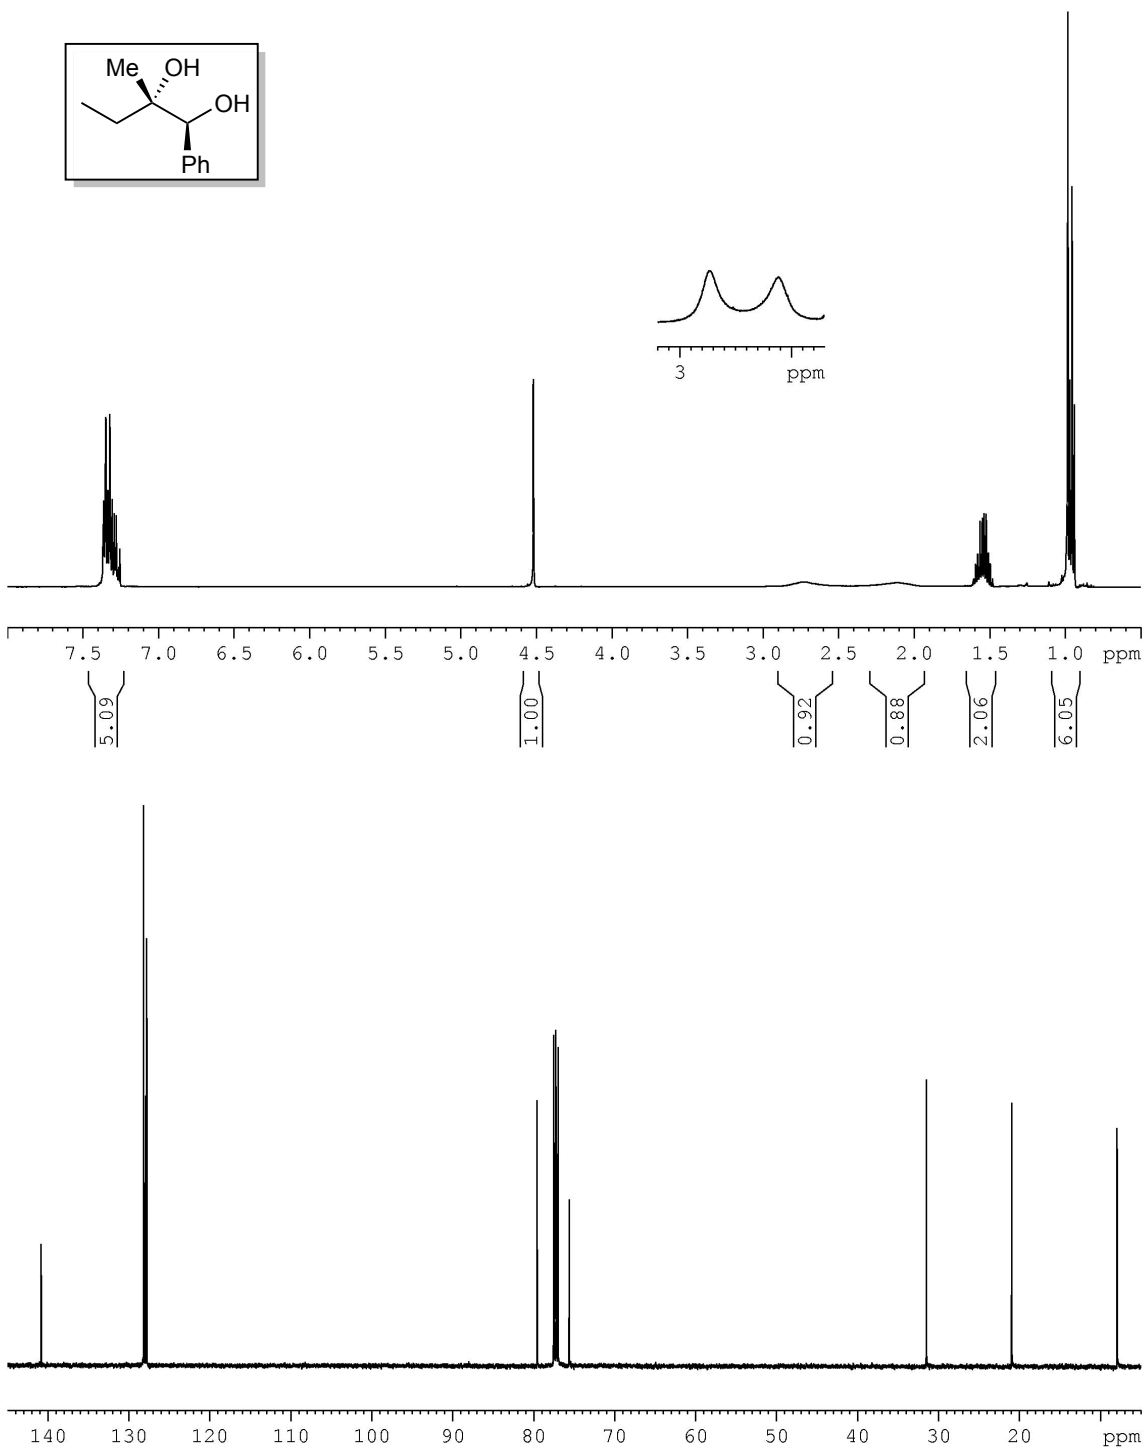

Figure SI-46. 500 MHz  $^1\text{H}$  and 125 MHz  $^{13}\text{C}\{^1\text{H}\}$  NMR in  $\text{CDCl}_3$ .

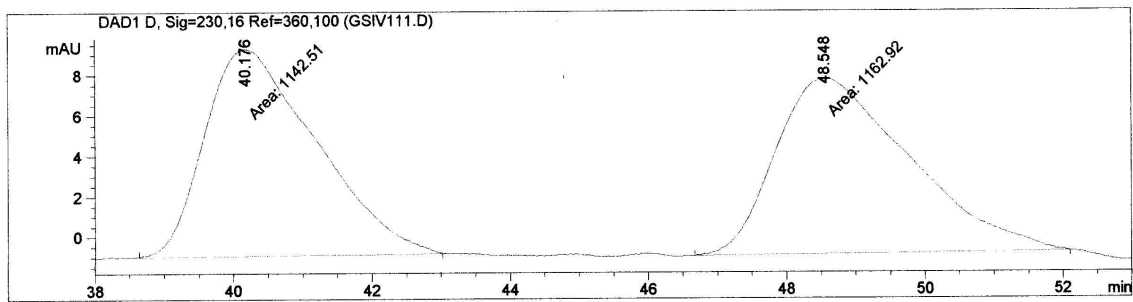

=====  
 Area Percent Report  
 =====

Sorted By : Signal  
 Multiplier : 1.0000  
 Dilution : 1.0000  
 Use Multiplier & Dilution Factor with ISTDs

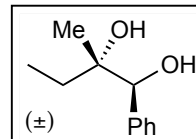

Signal 1: DAD1 D, Sig=230,16 Ref=360,100

| Peak # | RetTime [min] | Type | Width [min] | Area [mAU*s] | Height [mAU] | Area %  |
|--------|---------------|------|-------------|--------------|--------------|---------|
| 1      | 40.176        | MM   | 1.8641      | 1142.50952   | 10.21519     | 49.5574 |
| 2      | 48.548        | MM   | 2.2336      | 1162.91577   | 8.67759      | 50.4426 |

Totals : 2305.42529 18.89278

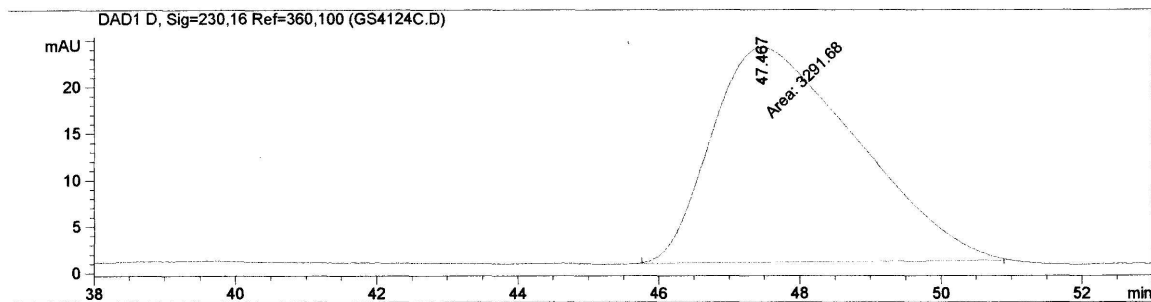

=====  
 Area Percent Report  
 =====

Sorted By : Signal  
 Multiplier : 1.0000  
 Dilution : 1.0000  
 Use Multiplier & Dilution Factor with ISTDs

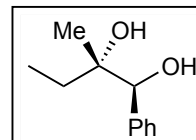

Signal 1: DAD1 D, Sig=230,16 Ref=360,100

| Peak # | RetTime [min] | Type | Width [min] | Area [mAU*s] | Height [mAU] | Area %   |
|--------|---------------|------|-------------|--------------|--------------|----------|
| 1      | 47.467        | MM   | 2.3765      | 3291.68335   | 23.08541     | 100.0000 |

Totals : 3291.68335 23.08541

Figure SI-47. HPLC analysis of chiral purity of ethyl addition product.
